# Supplementary material
Source: publisher figshare collection journal article supplement (https://acs.figshare.com/ndownloader/files/6214218)
Supplement: Supplementary file 1 [file 6214218]

38              
preCAT, RhC17NH18O
C       -1.375930000      2.205240000     -0.086380000
C       -2.205240000      0.025830000      0.003220000
C       -3.558310000      0.485700000     -0.021850000
C       -3.764430000      1.890280000     -0.083330000
C       -2.681130000      2.744710000     -0.117330000
H       -0.511580000      2.864040000     -0.111730000
C       -1.892640000     -1.380360000      0.056280000
C       -4.615510000     -0.462240000      0.011580000
H       -4.780140000      2.281700000     -0.104870000
H       -2.808370000      3.822690000     -0.166600000
C       -4.307600000     -1.812620000      0.065270000
C       -2.972820000     -2.274190000      0.086770000
H       -5.646730000     -0.118280000     -0.007080000
H       -5.112520000     -2.545070000      0.090350000
H       -2.762340000     -3.340700000      0.126720000
N       -1.139440000      0.898950000     -0.026450000
O       -0.631980000     -1.774990000      0.073260000
Rh       0.726780000     -0.169140000      0.017390000
C        2.101950000      1.389700000     -0.663750000
H        1.502270000      2.100060000     -1.233070000
C        1.986050000      1.439110000      0.736060000
H        1.321610000      2.197580000      1.152310000
C        3.301610000      0.810950000     -1.414780000
H        3.445340000      1.375840000     -2.341740000
H        4.212380000      0.961720000     -0.827580000
C        2.981050000      0.881290000      1.741400000
H        3.819590000      1.581560000      1.876330000
H        2.470830000      0.828320000      2.709340000
C        3.122880000     -0.685390000     -1.763890000
H        2.590370000     -0.767200000     -2.717410000
H        4.102700000     -1.162050000     -1.919210000
C        3.509080000     -0.525340000      1.375420000
H        3.814750000     -1.040460000      2.292110000
H        4.408860000     -0.449310000      0.758200000
C        2.460980000     -1.371670000      0.658450000
H        2.012470000     -2.172280000      1.246320000
C        2.320270000     -1.456340000     -0.730210000
H        1.785950000     -2.324280000     -1.117710000
40
LE-TS1, CsRhC17NH18OF
C        1.547650000      0.580800000     -2.162460000
C        2.441370000      0.721860000     -0.008860000
C        3.779550000      0.704440000     -0.509350000
C        3.951380000      0.621150000     -1.920140000
C        2.839460000      0.543260000     -2.731880000
H        0.673340000      0.518110000     -2.801520000
C        2.166690000      0.729830000      1.404770000
C        4.860110000      0.746390000      0.410970000
H        4.954730000      0.603730000     -2.341420000
H        2.930360000      0.457700000     -3.811730000
C        4.591340000      0.780450000      1.773550000
C        3.274490000      0.766720000      2.274630000
H        5.881610000      0.737340000      0.038340000
H        5.419240000      0.808260000      2.480510000
H        3.092530000      0.774500000      3.347300000
N        1.336880000      0.690190000     -0.846520000
O        0.920730000      0.688970000      1.809280000
Rh      -0.457230000      0.657430000      0.148310000
C       -1.316100000      1.874040000     -1.409900000
H       -0.523000000      2.034440000     -2.137870000
C       -1.904260000      0.581420000     -1.442970000
H       -1.524990000     -0.097910000     -2.211100000
C       -1.988350000      3.199440000     -1.026560000
H       -1.461980000      4.002560000     -1.555770000
H       -3.009800000      3.216540000     -1.419090000
C       -3.303210000      0.189970000     -0.988350000
H       -3.950010000      0.098060000     -1.875550000
H       -3.236880000     -0.809020000     -0.542870000
C       -1.987420000      3.567660000      0.471710000
H       -0.986130000      3.925610000      0.735940000
H       -2.658930000      4.426380000      0.627740000
C       -4.012340000      1.120250000      0.027390000
H       -4.933150000      0.614730000      0.343870000
H       -4.332290000      2.041150000     -0.465090000
C       -3.188600000      1.426670000      1.255880000
H       -3.259610000      0.697780000      2.058860000
C       -2.335910000      2.454960000      1.436380000
H       -1.841340000      2.519140000      2.406290000
F       -1.574890000     -0.979840000      1.317840000
Cs      -0.696680000     -3.405810000      0.008680000
40
LE-INT1, CsRhC17NH18OF                                           
C        0.876430000     -3.257990000      0.029620000
C        2.410760000     -1.500590000      0.000080000
C        3.517540000     -2.402440000      0.053030000
C        3.228150000     -3.794800000      0.095900000
C        1.914730000     -4.214070000      0.083720000
H       -0.158440000     -3.584950000      0.019220000
C        2.611940000     -0.073030000     -0.045870000
C        4.839440000     -1.881510000      0.060210000
H        4.044720000     -4.513300000      0.137350000
H        1.655160000     -5.269080000      0.114860000
C        5.026740000     -0.508110000      0.015400000
C        3.939210000      0.389170000     -0.037020000
H        5.684180000     -2.565030000      0.100460000
H        6.038060000     -0.104530000      0.020540000
H        4.114650000      1.462540000     -0.071300000
N        1.097410000     -1.943100000     -0.010510000
O        1.567570000      0.728740000     -0.093660000
Rh      -0.263280000     -0.388420000     -0.088590000
C       -1.960430000     -1.538150000     -0.788820000
H       -1.532230000     -2.446440000     -1.215800000
C       -1.973120000     -1.496390000      0.623720000
H       -1.585520000     -2.388360000      1.122460000
C       -2.868980000     -0.827640000     -1.789580000
H       -2.297540000     -0.054530000     -2.317090000
H       -3.147930000     -1.568120000     -2.552770000
C       -2.893860000     -0.697090000      1.527970000
H       -2.395340000     -0.588900000      2.500560000
H       -3.024110000      0.314190000      1.147350000
C       -4.164820000     -0.174930000     -1.259070000
H       -3.901600000      0.631750000     -0.575510000
H       -4.660350000      0.300860000     -2.115040000
C       -4.250360000     -1.386990000      1.788690000
H       -4.803980000     -0.800940000      2.539260000
H       -4.063140000     -2.355660000      2.274910000
C       -5.167200000     -1.643890000      0.613470000
H       -5.975430000     -2.343410000      0.839460000
C       -5.142090000     -1.150730000     -0.637100000
H       -5.918670000     -1.517010000     -1.311700000
F       -1.374770000      1.371160000     -0.176600000
Cs       0.500990000      3.656890000     -0.376630000
83
LE-TS2, CsRhC38PNH30OF10                                          
C       -0.585770000     -0.890170000     -3.764290000
C       -0.300220000     -2.710850000     -2.328540000
C        0.322480000     -3.481660000     -3.361810000
C        0.472370000     -2.871640000     -4.639040000
C        0.022990000     -1.583880000     -4.833830000
H       -0.947330000      0.122320000     -3.910120000
C       -0.479200000     -3.252570000     -0.997040000
C        0.763840000     -4.801600000     -3.081900000
H        0.942420000     -3.428590000     -5.447630000
H        0.123910000     -1.084980000     -5.794280000
C        0.585940000     -5.318880000     -1.805800000
C       -0.018410000     -4.568520000     -0.779160000
H        1.236470000     -5.386120000     -3.867640000
H        0.923460000     -6.330860000     -1.586210000
H       -0.139950000     -4.996210000      0.214310000
N       -0.749610000     -1.420760000     -2.551880000
O       -1.038020000     -2.525410000     -0.066090000
Rh      -1.651030000     -0.542770000     -0.907140000
C       -2.438400000      1.229650000     -1.843120000
H       -1.796740000      1.472120000     -2.691450000
C       -3.314260000      0.123040000     -2.060480000
H       -3.231610000     -0.349090000     -3.044020000
C       -2.669000000      2.452470000     -0.951330000
H       -2.162890000      2.317480000      0.009350000
H       -2.179820000      3.306130000     -1.438320000
C       -4.686130000     -0.086700000     -1.447290000
H       -4.905320000     -1.163330000     -1.450430000
H       -4.688140000      0.217830000     -0.401600000
C       -4.132790000      2.855380000     -0.636120000
H       -4.562900000      2.131120000      0.057090000
H       -4.096320000      3.807830000     -0.091290000
C       -5.819130000      0.602470000     -2.246330000
H       -6.779730000      0.389550000     -1.750650000
H       -5.894830000      0.109830000     -3.226010000
C       -5.719540000      2.091920000     -2.504110000
H       -6.311820000      2.431570000     -3.356720000
C       -5.020800000      3.033340000     -1.846580000
H       -5.085390000      4.050620000     -2.238240000
F       -2.594980000      0.044370000      0.870980000
Cs      -3.460510000     -2.597510000      1.915350000
P        0.925330000      0.492370000      0.269940000
C        1.179350000      2.235910000     -0.294240000
C        1.175710000      2.468860000     -1.683910000
C        1.293820000      3.337760000      0.567190000
C        1.310980000      3.756870000     -2.197230000
H        1.067210000      1.635750000     -2.374380000
C        1.413840000      4.636260000      0.060610000
H        1.294340000      3.197250000      1.644080000
C        1.430550000      4.845420000     -1.321070000
H        1.319310000      3.912020000     -3.273520000
H        1.505530000      5.475080000      0.745500000
C        0.985020000      0.644630000      2.116930000
C        2.170680000      0.685530000      2.871460000
C       -0.252780000      0.699230000      2.783880000
C        2.126740000      0.788910000      4.263210000
H        3.139000000      0.638710000      2.380400000
C       -0.299610000      0.813400000      4.176560000
H       -1.176520000      0.628570000      2.207210000
C        0.888770000      0.860250000      4.914650000
H        3.052050000      0.824170000      4.832860000
H       -1.260990000      0.861430000      4.682290000
C        2.569970000     -0.285110000     -0.091370000
C        2.649690000     -1.681410000      0.076270000
C        3.707080000      0.400610000     -0.549260000
C        3.834520000     -2.368960000     -0.183500000
H        1.776900000     -2.238400000      0.407430000
C        4.894980000     -0.283520000     -0.824370000
H        3.682640000      1.477650000     -0.687930000
C        4.960980000     -1.667580000     -0.634740000
H        3.876230000     -3.445880000     -0.040150000
H        5.765840000      0.266820000     -1.170860000
C        6.220040000     -2.420150000     -0.966050000
F        6.182570000     -2.958290000     -2.221580000
F        7.325590000     -1.634580000     -0.922530000
F        6.439710000     -3.459860000     -0.118590000
C        0.838750000      0.923970000      6.416880000
F        0.834010000     -0.320200000      6.983010000
F        1.906660000      1.574910000      6.946220000
F       -0.274110000      1.551880000      6.875350000
C        1.524180000      6.237200000     -1.882010000
F        2.308700000      6.295250000     -2.991460000
F        0.303970000      6.723310000     -2.258940000
F        2.030970000      7.127790000     -0.993370000
83                       
LE-INT2, CsRhC38PNH30OF10
C       -0.201970000     -1.880310000     -3.112550000
C       -0.949540000     -3.123500000     -1.277900000
C       -0.610660000     -4.355330000     -1.930030000
C       -0.040040000     -4.279110000     -3.231480000
C        0.171210000     -3.048990000     -3.812740000
H       -0.053990000     -0.905080000     -3.563130000
C       -1.496690000     -3.118100000      0.069870000
C       -0.841650000     -5.590030000     -1.270630000
H        0.229110000     -5.196820000     -3.751570000
H        0.613100000     -2.952620000     -4.801080000
C       -1.383620000     -5.582500000      0.008180000
C       -1.702740000     -4.383210000      0.669220000
H       -0.586350000     -6.520610000     -1.771810000
H       -1.561890000     -6.527340000      0.520110000
H       -2.112150000     -4.405670000      1.677570000
N       -0.749390000     -1.904340000     -1.898070000
O       -1.756790000     -1.995790000      0.672950000
Rh      -1.423780000     -0.245400000     -0.848090000
C       -2.001700000      0.940680000     -2.554250000
H       -1.369140000      0.662830000     -3.398780000
C       -3.029640000     -0.015950000     -2.260520000
H       -3.025950000     -0.902670000     -2.901340000
C       -2.066860000      2.461350000     -2.375370000
H       -1.641970000      2.743460000     -1.407800000
H       -1.419070000      2.909010000     -3.139750000
C       -4.415320000      0.291280000     -1.725840000
H       -4.798330000     -0.600070000     -1.208580000
H       -4.369080000      1.080460000     -0.975680000
C       -3.458310000      3.144430000     -2.468980000
H       -4.019910000      2.941430000     -1.555500000
H       -3.286600000      4.228730000     -2.480350000
C       -5.439690000      0.624720000     -2.840120000
H       -6.412070000      0.847110000     -2.371820000
H       -5.612720000     -0.289160000     -3.425280000
C       -5.103200000      1.725410000     -3.825880000
H       -5.617560000      1.633790000     -4.784990000
C       -4.276000000      2.775300000     -3.684870000
H       -4.166800000      3.433830000     -4.549020000
F       -2.291550000      1.223250000      0.370460000
Cs      -3.933610000     -0.434130000      2.243810000
P        0.853060000      0.365230000      0.115440000
C        1.625410000      1.866030000     -0.661160000
C        1.530590000      1.996450000     -2.058400000
C        2.278120000      2.877770000      0.061480000
C        2.089580000      3.089450000     -2.719570000
H        1.007120000      1.239800000     -2.635740000
C        2.825670000      3.986810000     -0.590590000
H        2.369020000      2.813970000      1.141490000
C        2.738680000      4.088450000     -1.982560000
H        2.014470000      3.163090000     -3.801650000
H        3.326980000      4.758510000     -0.012120000
C        0.973560000      0.779770000      1.922130000
C        2.064800000      0.442410000      2.740120000
C       -0.112200000      1.474070000      2.489090000
C        2.079150000      0.791690000      4.093360000
H        2.917040000     -0.093370000      2.331940000
C       -0.096630000      1.834830000      3.837680000
H       -0.975610000      1.702270000      1.865350000
C        0.997450000      1.489110000      4.641770000
H        2.930360000      0.519590000      4.712030000
H       -0.942540000      2.369620000      4.263490000
C        2.194780000     -0.900650000     -0.065290000
C        1.950800000     -2.172620000      0.489130000
C        3.396830000     -0.692320000     -0.759120000
C        2.888870000     -3.196610000      0.374510000
H        1.021160000     -2.364750000      1.017960000
C        4.337310000     -1.719370000     -0.890330000
H        3.619980000      0.274510000     -1.200120000
C        4.083820000     -2.971480000     -0.323410000
H        2.681590000     -4.169810000      0.812790000
H        5.261320000     -1.536910000     -1.432650000
C        5.107210000     -4.069350000     -0.413990000
F        4.539650000     -5.294950000     -0.567640000
F        5.967230000     -3.899620000     -1.449440000
F        5.876320000     -4.149080000      0.713020000
C        1.023170000      1.913770000      6.084500000
F        1.837160000      1.138250000      6.844120000
F        1.468640000      3.196870000      6.233990000
F       -0.208510000      1.874730000      6.658300000
C        3.289420000      5.296900000     -2.689130000
F        3.769470000      4.999950000     -3.924870000
F        2.339110000      6.261000000     -2.873470000
F        4.300600000      5.886720000     -2.002930000
83                       
LE-TS3, CsRhC38PNH30OF10
C        0.163820000      2.662180000     -2.033510000
C        1.938470000      3.138140000     -0.584510000
C        1.942770000      4.515210000     -0.985120000
C        0.997050000      4.920190000     -1.969300000
C        0.123290000      3.995350000     -2.496240000
H       -0.529380000      1.925880000     -2.425220000
C        2.910020000      2.634120000      0.371860000
C        2.880120000      5.412480000     -0.411350000
H        0.979070000      5.957700000     -2.298480000
H       -0.606810000      4.267340000     -3.254040000
C        3.790220000      4.934040000      0.523270000
C        3.814080000      3.582220000      0.908390000
H        2.877690000      6.456310000     -0.715940000
H        4.512440000      5.618600000      0.966420000
H        4.547510000      3.231440000      1.632220000
N        1.026240000      2.237980000     -1.108600000
O        2.927560000      1.374080000      0.691350000
Rh       1.234730000      0.283660000     -0.481420000
C        2.039700000     -0.560910000     -2.909690000
H        1.321020000      0.092960000     -3.402350000
C        3.115460000      0.052230000     -2.346530000
H        3.167310000      1.135020000     -2.454790000
C        1.765310000     -2.036860000     -3.125220000
H        0.998570000     -2.366550000     -2.415710000
H        1.313300000     -2.137170000     -4.122130000
C        4.349910000     -0.582120000     -1.745030000
H        4.778440000      0.129950000     -1.030730000
H        4.083750000     -1.465580000     -1.165090000
C        2.951910000     -3.023080000     -3.031870000
H        3.312710000     -3.059540000     -2.003500000
H        2.553240000     -4.023010000     -3.243460000
C        5.442980000     -0.916110000     -2.784460000
H        6.331050000     -1.292240000     -2.252250000
H        5.774250000      0.019940000     -3.256270000
C        5.100560000     -1.884120000     -3.895070000
H        5.806270000     -1.858610000     -4.728340000
C        4.079360000     -2.751280000     -4.007260000
H        4.040230000     -3.331370000     -4.931210000
F        1.783620000     -1.622030000      0.174620000
Cs       3.789840000     -1.080910000      2.326740000
P       -0.971990000     -0.161200000      0.015550000
C       -1.919010000     -1.385780000     -1.035380000
C       -1.760710000     -1.305030000     -2.430310000
C       -2.756740000     -2.388040000     -0.519020000
C       -2.432150000     -2.176700000     -3.287060000
H       -1.097500000     -0.554400000     -2.853020000
C       -3.419390000     -3.280480000     -1.367400000
H       -2.905440000     -2.484800000      0.552030000
C       -3.263620000     -3.169880000     -2.752770000
H       -2.303010000     -2.085280000     -4.362690000
H       -4.062520000     -4.048560000     -0.945330000
C       -1.288910000     -0.865810000      1.713210000
C       -2.349690000     -0.460010000      2.540730000
C       -0.408870000     -1.860050000      2.183510000
C       -2.527930000     -1.023300000      3.808240000
H       -3.054830000      0.295450000      2.207790000
C       -0.590810000     -2.434750000      3.441500000
H        0.429170000     -2.155770000      1.555220000
C       -1.651700000     -2.016010000      4.257120000
H       -3.355770000     -0.695830000      4.431760000
H        0.093120000     -3.207230000      3.786040000
C       -2.129720000      1.292640000      0.017840000
C       -1.742850000      2.423220000      0.762850000
C       -3.337830000      1.344640000     -0.693760000
C       -2.544350000      3.561480000      0.812210000
H       -0.802870000      2.412480000      1.309730000
C       -4.141550000      2.489610000     -0.663910000
H       -3.673340000      0.491890000     -1.276100000
C       -3.748240000      3.595590000      0.094240000
H       -2.230650000      4.418380000      1.403490000
H       -5.074670000      2.506920000     -1.220890000
C       -1.807230000     -2.602420000      5.632220000
F       -3.068270000     -2.476720000      6.117240000
F       -1.499660000     -3.926390000      5.669410000
F       -0.985720000     -2.000310000      6.544780000
C       -3.939700000     -4.151110000     -3.670240000
F       -4.281670000     -3.595780000     -4.862040000
F       -3.136460000     -5.216480000     -3.965510000
F       -5.074410000     -4.668990000     -3.135110000
C       -4.581990000      4.847060000      0.103450000
F       -4.126680000      5.773980000     -0.791470000
F       -5.879380000      4.614080000     -0.217550000
F       -4.578360000      5.462170000      1.315480000
63                      
CAT, CsRhC30PNH18OF10
C        1.016440000     -3.147570000      0.179450000
C        3.234360000     -2.463860000      0.384540000
C        3.694460000     -3.816100000      0.448320000
C        2.717920000     -4.847330000      0.370820000
C        1.388760000     -4.508670000      0.237570000
H       -0.028270000     -2.884730000      0.065590000
C        4.159950000     -1.361200000      0.458630000
C        5.084480000     -4.074010000      0.584380000
H        3.029610000     -5.889190000      0.416820000
H        0.612000000     -5.266260000      0.174050000
C        5.969070000     -3.007440000      0.653060000
C        5.525390000     -1.670750000      0.592100000
H        5.435460000     -5.102030000      0.632760000
H        7.035510000     -3.200950000      0.757580000
H        6.239140000     -0.851440000      0.649740000
N        1.891510000     -2.141320000      0.250190000
O        3.701640000     -0.130560000      0.401110000
Rh       1.576050000     -0.083940000      0.206540000
F        1.664760000      1.987290000      0.209160000
Cs       4.473150000      2.876690000     -0.078570000
P       -0.692190000      0.011750000     -0.003680000
C       -1.693650000     -0.384580000      1.517490000
C       -1.093280000     -1.146560000      2.532540000
C       -3.014500000      0.061450000      1.701980000
C       -1.794580000     -1.472840000      3.696240000
H       -0.062520000     -1.472250000      2.419990000
C       -3.720740000     -0.253730000      2.864140000
H       -3.503970000      0.664430000      0.941600000
C       -3.110640000     -1.027490000      3.859100000
H       -1.313970000     -2.067530000      4.468810000
H       -4.742090000      0.097540000      2.987660000
C       -1.395390000      1.670240000     -0.446660000
C       -2.165110000      1.907730000     -1.593840000
C       -1.116130000      2.746730000      0.416930000
C       -2.655880000      3.188170000     -1.876090000
H       -2.402240000      1.100630000     -2.280280000
C       -1.612430000      4.020060000      0.149480000
H       -0.497530000      2.589960000      1.294100000
C       -2.384360000      4.241840000     -1.001000000
H       -3.255290000      3.350960000     -2.767540000
H       -1.396210000      4.838320000      0.832660000
C       -1.439180000     -1.092720000     -1.302530000
C       -0.742510000     -1.201300000     -2.520900000
C       -2.620240000     -1.831850000     -1.137560000
C       -1.221430000     -2.007350000     -3.552840000
H        0.190570000     -0.658660000     -2.656270000
C       -3.100690000     -2.654160000     -2.162400000
H       -3.177310000     -1.787690000     -0.206870000
C       -2.401970000     -2.739980000     -3.369510000
H       -0.668460000     -2.076240000     -4.486540000
H       -4.011940000     -3.226530000     -2.010850000
C       -2.931080000     -3.585700000     -4.497190000
F       -3.781980000     -4.551320000     -4.071060000
F       -3.619130000     -2.841640000     -5.411940000
F       -1.937980000     -4.206670000     -5.185360000
C       -2.877260000      5.631800000     -1.294920000
F       -3.841080000      5.658510000     -2.247930000
F       -3.395370000      6.238750000     -0.192430000
F       -1.875480000      6.449050000     -1.736280000
C       -3.854750000     -1.328280000      5.132990000
F       -3.443810000     -2.483690000      5.713540000
F       -3.683880000     -0.347930000      6.067830000
F       -5.193680000     -1.436710000      4.937060000
34                   
PPh3, C18PH15                                         
P        0.000210000     -0.001000000     -1.197610000
C       -1.671490000     -0.050530000     -0.400380000
C       -2.689400000      0.710070000     -1.007680000
C       -1.992400000     -0.817020000      0.733370000
C       -3.985780000      0.724510000     -0.482520000
H       -2.468430000      1.296740000     -1.898400000
C       -3.293480000     -0.814080000      1.252530000
H       -1.228980000     -1.420780000      1.217050000
C       -4.292490000     -0.041050000      0.649850000
H       -4.756740000      1.323410000     -0.963110000
H       -3.523940000     -1.414730000      2.130290000
C        0.879580000     -1.423190000     -0.399640000
C        1.704940000     -1.316640000      0.733220000
C        0.729280000     -2.685670000     -1.005450000
C        2.353360000     -2.444320000      1.253030000
H        1.846670000     -0.353130000      1.215720000
C        1.365410000     -3.815040000     -0.479630000
H        0.109880000     -2.788570000     -1.895470000
C        2.182780000     -3.696650000      0.651880000
H        2.989640000     -2.342620000      2.130050000
H        1.231760000     -4.782690000     -0.959010000
C        0.792360000      1.472480000     -0.401390000
C        1.957080000      1.976920000     -1.011560000
C        0.291140000      2.130990000      0.734890000
C        2.617020000      3.093150000     -0.486940000
H        2.352840000      1.494270000     -1.904200000
C        0.943410000      3.256930000      1.253550000
H       -0.611330000      1.769310000      1.220720000
C        2.109490000      3.738880000      0.647870000
H        3.518860000      3.463990000     -0.969830000
H        0.540100000      3.754850000      2.133190000
H        2.615270000      4.613250000      1.052130000
H        2.686650000     -4.571700000      1.057040000
H       -5.302440000     -0.039380000      1.054530000
20           
cod, C8H12
C        0.004800000      1.712770000     -0.212250000
H        0.278940000      2.651270000     -0.697710000
C       -1.222470000      1.240840000     -0.490550000
H       -1.832210000      1.853350000     -1.158800000
C        1.088080000      1.112240000      0.663600000
H        1.778260000      1.914880000      0.949460000
H        0.678450000      0.730310000      1.600970000
C       -1.925740000     -0.016310000     -0.031470000
H       -2.749430000      0.272350000      0.639570000
H       -2.418530000     -0.457550000     -0.909500000
C        1.925740000      0.016310000     -0.031440000
H        2.418530000      0.457570000     -0.909470000
H        2.749420000     -0.272350000      0.639590000
C       -1.088090000     -1.112250000      0.663570000
H       -1.778280000     -1.914890000      0.949420000
H       -0.678480000     -0.730330000      1.600960000
C       -0.004790000     -1.712770000     -0.212260000
H       -0.278920000     -2.651270000     -0.697730000
C        1.222480000     -1.240840000     -0.490540000
H        1.832230000     -1.853340000     -1.158780000
2        
CsF, CsF
F        0.000000000      0.000000000     -2.436970000
Cs       0.000000000      0.000000000      0.398780000
40
LE-TS1a, CsRhC17NH18OF                                          
C        1.525650000      0.298830000      2.179100000
C        2.469410000      0.583090000      0.062600000
C        3.799800000      0.487670000      0.573760000
C        3.934240000      0.297310000      1.978870000
C        2.806940000      0.197340000      2.770460000
H        0.611960000      0.198940000      2.756730000
C        2.204920000      0.751550000     -1.344210000
C        4.891390000      0.577730000     -0.330260000
H        4.928320000      0.225100000      2.417190000
H        2.884650000      0.040730000      3.843480000
C        4.633290000      0.747330000     -1.685550000
C        3.321670000      0.832240000     -2.198060000
H        5.909940000      0.509860000      0.044580000
H        5.467980000      0.815940000     -2.381670000
H        3.156310000      0.959450000     -3.265950000
N        1.365570000      0.501460000      0.875170000
O        0.960340000      0.811670000     -1.762600000
Rh      -0.462010000      0.684560000     -0.177170000
C       -1.744200000      1.778930000     -1.556600000
H       -1.144480000      1.772370000     -2.465500000
C       -2.362160000      0.556220000     -1.237930000
H       -2.233780000     -0.253320000     -1.960690000
C       -2.200610000      3.177560000     -1.130160000
H       -1.886230000      3.887050000     -1.904730000
H       -3.293840000      3.221450000     -1.122370000
C       -3.535100000      0.326960000     -0.298950000
H       -4.465160000      0.266690000     -0.886990000
H       -3.390590000     -0.655140000      0.164780000
C       -1.637670000      3.677840000      0.219630000
H       -0.620190000      4.047680000      0.054570000
H       -2.222510000      4.549740000      0.552820000
C       -3.734340000      1.362530000      0.837500000
H       -4.475120000      0.949130000      1.532920000
H       -4.176410000      2.279520000      0.440600000
C       -2.468710000      1.669020000      1.604170000
H       -2.244890000      1.001570000      2.431630000
C       -1.570420000      2.642030000      1.325750000
H       -0.733610000      2.757450000      2.014530000
F       -1.190420000     -0.948020000      1.390260000
Cs      -0.754760000     -3.220170000     -0.354140000
81
LE-TS1b, RhC38PNH30OF9                                           
C        2.707460000     -0.928650000      1.324310000
C        3.889440000      0.179180000     -0.354570000
C        5.060790000      0.265660000      0.466030000
C        4.993570000     -0.311570000      1.763300000
C        3.829630000     -0.919190000      2.182100000
H        1.780370000     -1.383130000      1.653040000
C        3.887300000      0.674560000     -1.715030000
C        6.228040000      0.889310000     -0.044670000
H        5.867140000     -0.274310000      2.412030000
H        3.747110000     -1.379940000      3.162840000
C        6.212760000      1.390690000     -1.339680000
C        5.076810000      1.286840000     -2.165220000
H        7.117970000      0.953530000      0.576580000
H        7.106650000      1.868150000     -1.738400000
H        5.101390000      1.672240000     -3.182410000
N        2.722760000     -0.395250000      0.104220000
O        2.824390000      0.535490000     -2.454710000
Rh       1.159460000     -0.568380000     -1.382830000
C       -0.350100000     -1.762880000     -2.551930000
H       -1.325750000     -1.559540000     -2.122870000
C        0.150990000     -0.727900000     -3.353600000
H       -0.473760000      0.164070000     -3.413590000
C       -0.078130000     -3.266660000     -2.665960000
H       -0.906040000     -3.784570000     -2.167510000
H       -0.155040000     -3.556150000     -3.718710000
C        1.115280000     -0.819580000     -4.524360000
H        0.511440000     -0.721550000     -5.439880000
H        1.771130000      0.055560000     -4.495390000
C        1.224520000     -3.826540000     -2.056900000
H        1.120620000     -3.831020000     -0.966070000
H        1.305660000     -4.886480000     -2.343250000
C        1.984190000     -2.091950000     -4.664320000
H        2.638140000     -1.937870000     -5.530900000
H        1.355070000     -2.948300000     -4.916430000
C        2.848870000     -2.395930000     -3.463460000
H        3.839820000     -1.944620000     -3.473110000
C        2.521990000     -3.119120000     -2.377220000
H        3.294540000     -3.238150000     -1.616470000
P       -0.515020000     -0.014930000      0.063010000
C       -0.304730000      1.681480000      0.801320000
C        0.891910000      2.388260000      0.620890000
C       -1.356980000      2.301590000      1.502060000
C        1.048640000      3.676970000      1.140920000
H        1.705070000      1.942080000      0.060260000
C       -1.208410000      3.585450000      2.024310000
H       -2.306060000      1.790160000      1.641200000
C        0.000220000      4.271780000      1.846710000
H        1.985010000      4.207830000      0.991600000
H       -2.030290000      4.045260000      2.567610000
C       -2.225520000      0.186860000     -0.634090000
C       -3.328330000     -0.586090000     -0.243650000
C       -2.404620000      1.170370000     -1.625600000
C       -4.582830000     -0.386950000     -0.829950000
H       -3.232440000     -1.344020000      0.527320000
C       -3.652200000      1.375880000     -2.210490000
H       -1.569230000      1.793360000     -1.937250000
C       -4.744670000      0.593920000     -1.811010000
H       -5.427140000     -0.991190000     -0.509200000
H       -3.772050000      2.146560000     -2.968090000
C       -0.789170000     -1.115390000      1.537090000
C       -0.937030000     -2.494130000      1.290060000
C       -0.789930000     -0.670680000      2.867980000
C       -1.117790000     -3.396960000      2.335860000
H       -0.903170000     -2.870730000      0.271740000
C       -0.953530000     -1.573150000      3.924670000
H       -0.648720000      0.378780000      3.104440000
C       -1.122420000     -2.933600000      3.658680000
H       -1.236730000     -4.456130000      2.120340000
H       -0.942010000     -1.208420000      4.948160000
C       -1.342960000     -3.912950000      4.781770000
F       -0.660820000     -5.072360000      4.591650000
F       -0.963030000     -3.421060000      5.985330000
F       -2.656910000     -4.259710000      4.900630000
C        0.138410000      5.676760000      2.372580000
F       -0.403330000      6.593880000      1.519860000
F       -0.494020000      5.844550000      3.562540000
F        1.431600000      6.038880000      2.555350000
C       -6.079790000      0.792480000     -2.478510000
F       -6.145120000      0.156880000     -3.684410000
F       -7.109260000      0.315940000     -1.736870000
F       -6.340600000      2.102290000     -2.726280000
63
CATa, CsRhC30PNH18OF10                                         
C        3.844260000     -2.323270000     -1.760010000
C        4.417230000     -0.422380000     -0.530350000
C        5.815380000     -0.663800000     -0.695760000
C        6.184490000     -1.817010000     -1.445270000
C        5.207420000     -2.637310000     -1.973480000
H        3.040810000     -2.937600000     -2.158970000
C        3.924470000      0.719070000      0.202350000
C        6.744460000      0.242000000     -0.118980000
H        7.238980000     -2.041140000     -1.597770000
H        5.464650000     -3.521160000     -2.551750000
C        6.266730000      1.338810000      0.587000000
C        4.886990000      1.585040000      0.751500000
H        7.811560000      0.069770000     -0.237720000
H        6.975180000      2.037070000      1.030090000
H        4.547880000      2.455520000      1.309220000
N        3.465350000     -1.257590000     -1.062860000
O        2.626690000      0.905670000      0.327670000
Rh       1.503680000     -0.590170000     -0.644870000
F        0.687670000     -2.215010000     -1.691990000
Cs       0.381430000     -4.597190000      0.037110000
P       -0.473790000      0.440320000     -0.101420000
C       -2.093230000     -0.438410000     -0.304800000
C       -2.181160000     -1.405910000     -1.321940000
C       -3.222520000     -0.180240000      0.490780000
C       -3.380600000     -2.085160000     -1.550390000
H       -1.292940000     -1.648610000     -1.901230000
C       -4.420900000     -0.863500000      0.271080000
H       -3.181890000      0.556920000      1.287750000
C       -4.500520000     -1.810950000     -0.756230000
H       -3.438360000     -2.827210000     -2.343140000
H       -5.287080000     -0.648700000      0.891640000
C       -0.576820000      1.035450000      1.656010000
C       -1.029540000      2.310050000      2.028040000
C       -0.175940000      0.141880000      2.664970000
C       -1.085010000      2.686140000      3.374180000
H       -1.346460000      3.025680000      1.274700000
C       -0.238900000      0.503240000      4.010230000
H        0.198210000     -0.842980000      2.394290000
C       -0.695480000      1.780080000      4.364710000
H       -1.440010000      3.677570000      3.642890000
H        0.068500000     -0.204470000      4.776290000
C       -0.733470000      2.007950000     -1.065290000
C        0.360980000      2.890880000     -1.163410000
C       -1.924790000      2.332660000     -1.729730000
C        0.256210000      4.075420000     -1.889110000
H        1.299080000      2.636540000     -0.675060000
C       -2.031080000      3.514620000     -2.472570000
H       -2.784190000      1.670540000     -1.681530000
C       -0.942360000      4.385740000     -2.549970000
H        1.109110000      4.747380000     -1.952670000
H       -2.960330000      3.746690000     -2.985730000
C       -1.048340000      5.681150000     -3.306930000
F       -2.108470000      5.711830000     -4.151340000
F       -1.189820000      6.752350000     -2.471110000
F        0.060020000      5.933810000     -4.054090000
C       -5.774660000     -2.583030000     -0.968720000
F       -5.789220000     -3.750610000     -0.258430000
F       -6.875060000     -1.889950000     -0.581090000
F       -5.961430000     -2.929190000     -2.268130000
C       -0.711410000      2.186310000      5.813660000
F       -1.048150000      1.157050000      6.634470000
F        0.511070000      2.623920000      6.236540000
F       -1.584610000      3.193710000      6.063760000
22
1a, C8H14
C       -0.193890000     -1.343320000     -4.707290000
C       -0.007240000     -1.564270000     -3.265370000
H       -0.336170000     -0.269700000     -4.884600000
C        0.135960000     -1.755250000     -2.074840000
H        0.265810000     -1.921390000     -1.023180000
H        0.729520000     -1.623400000     -5.229960000
C       -1.383840000     -2.129060000     -5.299310000
H       -2.299750000     -1.844200000     -4.767350000
H       -1.233050000     -3.199350000     -5.112840000
C       -1.556150000     -1.881110000     -6.803940000
H       -1.696360000     -0.805540000     -6.981190000
H       -0.630400000     -2.160160000     -7.326460000
C       -2.735060000     -2.653490000     -7.413170000
H       -3.660870000     -2.374940000     -6.890170000
H       -2.595460000     -3.729130000     -7.235080000
C       -2.912930000     -2.409950000     -8.918970000
H       -3.052910000     -1.335280000     -9.097620000
H       -1.988350000     -2.688800000     -9.442260000
C       -4.092680000     -3.184390000     -9.521560000
H       -5.038250000     -2.902020000     -9.043380000
H       -3.965780000     -4.265690000     -9.390510000
H       -4.191790000     -2.989020000    -10.595280000
21
2a, C7H12O2
C        0.496370000      0.616670000     -0.000380000
H        0.503310000      1.257850000     -0.887280000
H        0.503170000      1.258520000      0.886030000
C       -1.888940000      0.536310000     -0.000020000
C       -3.104360000     -0.317340000      0.000200000
C       -3.095250000     -1.657530000     -0.000040000
H       -2.167110000     -2.222460000     -0.000350000
O       -0.736260000     -0.159540000     -0.000200000
O       -1.941770000      1.762440000     -0.000020000
H       -4.036300000      0.243260000      0.000530000
H       -4.025540000     -2.220510000      0.000130000
C        1.661920000     -0.361240000      0.000080000
H        1.586530000     -1.010120000     -0.881300000
H        1.586460000     -1.009350000      0.882020000
C        3.017410000      0.362440000     -0.000190000
H        3.081900000      1.018030000      0.878130000
H        3.081990000      1.017180000     -0.879140000
C        4.206070000     -0.607680000      0.000340000
H        4.190070000     -1.254780000     -0.884340000
H        5.157840000     -0.065600000      0.000090000
H        4.190010000     -1.253870000      0.885690000
85
TS1, CsRhC38PNH32OF10                                          
C       -2.070700000      0.998910000     -2.707450000
C       -0.860320000      2.979010000     -2.514340000
C       -1.540070000      3.561170000     -3.628520000
C       -2.529260000      2.772610000     -4.279220000
C       -2.792920000      1.503240000     -3.811680000
H       -2.282160000      0.000000000     -2.345540000
C        0.132310000      3.718320000     -1.782450000
C       -1.210830000      4.883610000     -4.028530000
H       -3.069090000      3.180000000     -5.131970000
H       -3.546280000      0.871360000     -4.274990000
C       -0.242800000      5.585430000     -3.324750000
C        0.423400000      5.022880000     -2.216570000
H       -1.723680000      5.328720000     -4.877790000
H        0.012090000      6.599260000     -3.629160000
H        1.175860000      5.594930000     -1.677580000
N       -1.123270000      1.691100000     -2.071110000
O        0.715170000      3.156490000     -0.743770000
Rh       0.053240000      1.181870000     -0.411210000
F       -0.130580000      1.477550000      2.226210000
Cs       0.178050000      4.400280000      2.139070000
P       -0.797720000     -0.901900000      0.035550000
C       -0.744110000     -2.220460000     -1.274610000
C       -0.173780000     -1.912470000     -2.517620000
C       -1.182720000     -3.537160000     -1.038660000
C       -0.060120000     -2.885350000     -3.516750000
H        0.199320000     -0.907970000     -2.701480000
C       -1.075820000     -4.512330000     -2.028680000
H       -1.598970000     -3.815350000     -0.073430000
C       -0.513290000     -4.183360000     -3.270500000
H        0.388730000     -2.629470000     -4.472620000
H       -1.417740000     -5.525210000     -1.829250000
C       -0.037470000     -1.862120000      1.433540000
C       -0.702460000     -2.153050000      2.632360000
C        1.279380000     -2.324920000      1.261380000
C       -0.071370000     -2.889660000      3.639780000
H       -1.720690000     -1.816060000      2.796970000
C        1.913830000     -3.063420000      2.258580000
H        1.819120000     -2.111560000      0.343280000
C        1.235430000     -3.347780000      3.451410000
H       -0.605410000     -3.110370000      4.560140000
H        2.929490000     -3.419180000      2.103620000
C       -2.579720000     -0.761630000      0.523400000
C       -2.865740000      0.211840000      1.504100000
C       -3.634940000     -1.474150000     -0.062260000
C       -4.181190000      0.436870000      1.905480000
H       -2.039560000      0.785860000      1.932040000
C       -4.958530000     -1.236760000      0.328740000
H       -3.449970000     -2.212940000     -0.836170000
C       -5.229300000     -0.285840000      1.314400000
H       -4.392570000      1.184660000      2.667000000
H       -5.766500000     -1.791650000     -0.139870000
C        4.339490000      0.473640000     -0.694900000
C        3.189540000      0.698260000      0.192110000
H        4.290560000     -0.546370000     -1.097920000
C        2.239510000      0.881710000      0.936920000
H        1.417000000      1.072090000      1.649280000
H        4.265370000      1.150960000     -1.555410000
C        5.699110000      0.684450000      0.008080000
H        5.765720000      0.006710000      0.868000000
H        5.738400000      1.704560000      0.409530000
C        6.887960000      0.449390000     -0.933530000
H        6.835360000     -0.571320000     -1.337630000
H        6.807140000      1.125580000     -1.796170000
C        8.248620000      0.656060000     -0.252750000
H        8.329440000     -0.019960000      0.610220000
H        8.300400000      1.676430000      0.152770000
C        9.443260000      0.424050000     -1.189460000
H        9.392710000     -0.595620000     -1.594640000
H        9.363430000      1.099730000     -2.051730000
C       10.799640000      0.632630000     -0.502830000
H       10.925710000     -0.053540000      0.343190000
H       10.895900000      1.654560000     -0.116960000
H       11.629540000      0.460030000     -1.197360000
C       -6.639330000     -0.038340000      1.776970000
F       -6.929130000      1.289180000      1.856130000
F       -7.567400000     -0.595400000      0.961230000
F       -6.865110000     -0.546390000      3.024090000
C        1.940430000     -4.106520000      4.542050000
F        2.744340000     -3.296850000      5.293500000
F        1.080290000     -4.698350000      5.408230000
F        2.746180000     -5.086050000      4.053010000
C       -0.434650000     -5.238630000     -4.342160000
F        0.429140000     -4.913940000     -5.334180000
F       -0.039600000     -6.442270000     -3.849600000
F       -1.645040000     -5.450850000     -4.935760000
85                   
INT1, CsRhC38PNH32OF10                                           
C       -2.792530000     -0.001860000      2.229540000
C       -2.225120000     -2.235180000      2.562440000
C       -3.324050000     -2.430550000      3.457730000
C       -4.166880000     -1.314480000      3.708750000
C       -3.905580000     -0.109270000      3.092630000
H       -2.580690000      0.945290000      1.746610000
C       -1.336700000     -3.321470000      2.230550000
C       -3.531130000     -3.707220000      4.043760000
H       -5.014320000     -1.423520000      4.383460000
H       -4.532160000      0.763180000      3.257180000
C       -2.665270000     -4.743160000      3.727930000
C       -1.586340000     -4.564100000      2.836900000
H       -4.363570000     -3.854820000      4.727420000
H       -2.817410000     -5.724620000      4.173800000
H       -0.925130000     -5.395550000      2.601640000
N       -1.969780000     -1.014620000      1.969270000
O       -0.352270000     -3.125580000      1.379160000
Rh      -0.205280000     -1.111830000      0.715920000
F       -0.456770000     -1.933380000     -3.185900000
Cs      -1.519920000     -4.200130000     -1.615030000
P       -0.166900000      1.044880000     -0.079270000
C       -0.026610000      2.420030000      1.160790000
C        0.030340000      2.102620000      2.525190000
C        0.089740000      3.767890000      0.772220000
C        0.181280000      3.105420000      3.488840000
H       -0.031100000      1.064130000      2.839820000
C        0.238230000      4.773450000      1.725840000
H        0.072590000      4.041920000     -0.279890000
C        0.279070000      4.439650000      3.087050000
H        0.221630000      2.841530000      4.542170000
H        0.319910000      5.810600000      1.409580000
C        1.198410000      1.545550000     -1.235930000
C        1.014440000      1.784080000     -2.603470000
C        2.492200000      1.666760000     -0.696290000
C        2.094540000      2.142730000     -3.417940000
H        0.031920000      1.701080000     -3.055540000
C        3.571740000      2.025850000     -1.499280000
H        2.664800000      1.487990000      0.362320000
C        3.372140000      2.261370000     -2.867030000
H        1.931640000      2.324210000     -4.476890000
H        4.563680000      2.114760000     -1.062800000
C       -1.715470000      1.400310000     -1.035500000
C       -2.052850000      0.496400000     -2.065750000
C       -2.594300000      2.451540000     -0.733520000
C       -3.235650000      0.670320000     -2.785090000
H       -1.407530000     -0.349440000     -2.329520000
C       -3.787870000      2.614240000     -1.445270000
H       -2.372920000      3.152610000      0.065450000
C       -4.106520000      1.723750000     -2.472620000
H       -3.481780000     -0.027860000     -3.582120000
H       -4.460160000      3.428800000     -1.190260000
C        3.001100000     -1.766300000      1.011150000
C        1.850000000     -1.650040000      0.090230000
H        3.253700000     -0.772800000      1.403260000
C        1.135000000     -1.710950000     -0.927960000
H        0.635020000     -1.789240000     -1.919020000
H        2.699260000     -2.366830000      1.878190000
C        4.243350000     -2.394460000      0.344970000
H        4.529010000     -1.788260000     -0.523520000
H        3.977540000     -3.386870000     -0.039840000
C        5.430550000     -2.512290000      1.310740000
H        5.687370000     -1.515020000      1.694840000
H        5.131060000     -3.109330000      2.183590000
C        6.674170000     -3.143360000      0.667950000
H        6.973550000     -2.547310000     -0.205770000
H        6.417410000     -4.140690000      0.283610000
C        7.865920000     -3.264260000      1.628960000
H        8.124390000     -2.267780000      2.011990000
H        7.567240000     -3.859270000      2.502610000
C        9.104220000     -3.897590000      0.980690000
H        9.449590000     -3.306610000      0.123970000
H        8.888430000     -4.909910000      0.618540000
H        9.935010000     -3.969020000      1.691770000
C       -5.364970000      1.902950000     -3.278050000
F       -5.114970000      2.457760000     -4.500240000
F       -5.992080000      0.721300000     -3.523140000
F       -6.268150000      2.709700000     -2.668340000
C        0.484680000      5.529640000      4.106540000
F       -0.203140000      6.659090000      3.795820000
F        0.097720000      5.159070000      5.351230000
F        1.795540000      5.896080000      4.201260000
C        4.535750000      2.689090000     -3.719480000
F        4.818840000      4.016940000     -3.569610000
F        5.678160000      2.023570000     -3.403420000
F        4.316080000      2.492010000     -5.042590000
85                    
TS2, CsRhC38PNH32OF10                                           
C        2.883020000     -1.390750000     -1.829300000
C        1.381350000     -3.101980000     -2.305630000
C        2.363780000     -3.822110000     -3.054880000
C        3.659370000     -3.245550000     -3.160330000
C        3.914870000     -2.040060000     -2.543320000
H        3.085950000     -0.441510000     -1.347790000
C        0.053630000     -3.630980000     -2.124680000
C        2.016730000     -5.065630000     -3.647060000
H        4.435100000     -3.763340000     -3.721600000
H        4.893620000     -1.570210000     -2.594510000
C        0.732350000     -5.561390000     -3.478590000
C       -0.239450000     -4.865300000     -2.730180000
H        2.761790000     -5.611990000     -4.220440000
H        0.461130000     -6.513870000     -3.931090000
H       -1.239250000     -5.277450000     -2.609180000
N        1.649710000     -1.882000000     -1.710130000
O       -0.819190000     -2.961900000     -1.402280000
Rh      -0.059290000     -1.104980000     -0.693520000
F       -1.120980000     -1.598440000      2.628180000
Cs      -1.411820000     -4.415090000      1.411050000
P        0.825410000      0.849470000      0.090450000
C        1.506830000      2.055550000     -1.154450000
C        1.474450000      1.715040000     -2.513800000
C        1.986930000      3.327190000     -0.786980000
C        1.927850000      2.609420000     -3.489880000
H        1.079720000      0.747830000     -2.813770000
C        2.443320000      4.223290000     -1.751710000
H        1.999600000      3.631740000      0.256680000
C        2.416680000      3.859960000     -3.106190000
H        1.895880000      2.327510000     -4.538660000
H        2.816570000      5.199250000     -1.449840000
C       -0.252560000      2.025860000      1.046160000
C       -0.055580000      2.354420000      2.393310000
C       -1.329300000      2.614410000      0.357710000
C       -0.910770000      3.251580000      3.044060000
H        0.765720000      1.922520000      2.956250000
C       -2.179280000      3.514750000      0.994430000
H       -1.508290000      2.368810000     -0.685860000
C       -1.972130000      3.830420000      2.345380000
H       -0.742690000      3.492240000      4.090300000
H       -3.005450000      3.959530000      0.444770000
C        2.230440000      0.524430000      1.261910000
C        1.972810000     -0.381340000      2.312590000
C        3.524130000      1.046890000      1.122380000
C        2.980350000     -0.728320000      3.210830000
H        0.981270000     -0.817780000      2.429060000
C        4.543450000      0.685810000      2.011630000
H        3.763880000      1.734190000      0.316820000
C        4.269090000     -0.194920000      3.059340000
H        2.762510000     -1.416690000      4.024470000
H        5.540370000      1.098470000      1.883650000
C       -3.996240000      0.012670000     -1.177310000
C       -2.864560000     -0.422760000     -0.347260000
H       -3.914630000      1.087470000     -1.389110000
C       -1.932080000     -0.786000000      0.383250000
H       -1.459660000     -1.197440000      1.611010000
H       -3.955800000     -0.502540000     -2.146050000
C       -5.363550000     -0.271410000     -0.512140000
H       -5.398480000      0.231400000      0.462150000
H       -5.446060000     -1.347020000     -0.313210000
C       -6.544300000      0.190480000     -1.377030000
H       -6.449570000      1.267040000     -1.576500000
H       -6.495470000     -0.308800000     -2.354890000
C       -7.909970000     -0.087800000     -0.732660000
H       -7.957610000      0.409350000      0.246550000
H       -8.004640000     -1.164690000     -0.533350000
C       -9.097360000      0.372810000     -1.590790000
H       -9.004470000      1.449140000     -1.789050000
H       -9.050450000     -0.123330000     -2.569610000
C      -10.458570000      0.090200000     -0.941180000
H      -10.551040000      0.601440000      0.024520000
H      -11.283210000      0.430380000     -1.577700000
H      -10.597470000     -0.982700000     -0.761990000
C        5.354680000     -0.619010000      4.010990000
F        4.935750000     -0.609740000      5.305220000
F        5.783620000     -1.891410000      3.763580000
F        6.450670000      0.175590000      3.945590000
C        2.881300000      4.854400000     -4.137270000
F        1.989540000      5.873980000     -4.299760000
F        4.060610000      5.436920000     -3.791060000
F        3.059360000      4.298130000     -5.359460000
C       -2.872910000      4.831300000      3.015320000
F       -2.543860000      6.116580000      2.688870000
F       -4.175150000      4.675520000      2.656060000
F       -2.824990000      4.757130000      4.368420000
85                   
INT2, CsRhC38PNH32OF10                                           
C        4.031440000      0.349880000      0.543840000
C        3.527760000      2.505290000      1.246910000
C        4.911760000      2.828460000      1.413160000
C        5.860430000      1.813680000      1.111180000
C        5.419140000      0.580010000      0.684680000
H        3.679670000     -0.616860000      0.207930000
C        2.500880000      3.471440000      1.558480000
C        5.281960000      4.120050000      1.874920000
H        6.923240000      2.019890000      1.226020000
H        6.113000000     -0.223310000      0.451070000
C        4.289870000      5.042700000      2.169020000
C        2.921990000      4.732310000      2.020360000
H        6.334460000      4.363270000      1.999540000
H        4.565920000      6.031930000      2.530810000
H        2.163220000      5.469530000      2.276700000
N        3.103950000      1.269170000      0.802650000
O        1.236010000      3.156510000      1.399830000
Rh       0.921120000      1.117530000      0.776610000
F       -1.979420000      3.272340000     -0.786200000
Cs       0.364440000      5.280520000     -0.904400000
P        0.428100000     -0.982230000      0.053680000
C        1.794850000     -2.127290000     -0.497850000
C        2.265300000     -3.207650000      0.262460000
C        2.429150000     -1.844890000     -1.723960000
C        3.334650000     -3.991430000     -0.186260000
H        1.803220000     -3.460030000      1.211650000
C        3.490410000     -2.623090000     -2.181140000
H        2.095860000     -1.006510000     -2.331580000
C        3.947870000     -3.699020000     -1.406730000
H        3.682660000     -4.823400000      0.420140000
H        3.964570000     -2.385640000     -3.130480000
C       -0.428210000     -2.007250000      1.352640000
C       -1.588510000     -2.765270000      1.140210000
C        0.119030000     -1.970690000      2.648730000
C       -2.180170000     -3.481490000      2.186220000
H       -2.060850000     -2.796910000      0.164030000
C       -0.453340000     -2.694390000      3.693920000
H        0.993010000     -1.354050000      2.846560000
C       -1.610290000     -3.450110000      3.461710000
H       -3.085730000     -4.053240000      2.001390000
H       -0.010530000     -2.653110000      4.686080000
C       -0.661700000     -1.152200000     -1.451530000
C       -1.253070000     -0.012640000     -2.013300000
C       -0.864430000     -2.394970000     -2.081950000
C       -2.039110000     -0.105030000     -3.166560000
H       -1.097390000      0.954130000     -1.548970000
C       -1.649450000     -2.497980000     -3.229770000
H       -0.402210000     -3.296290000     -1.687590000
C       -2.241010000     -1.348550000     -3.770960000
H       -2.490500000      0.790950000     -3.584290000
H       -1.798940000     -3.468380000     -3.696930000
C       -3.646460000      1.631850000      1.831280000
C       -2.239290000      1.483150000      1.401450000
H       -3.793880000      1.064540000      2.760810000
C       -1.052020000      1.305330000      1.098360000
H       -1.848450000      2.612230000     -0.065170000
H       -3.848670000      2.681380000      2.085880000
C       -4.681010000      1.160310000      0.786870000
H       -4.487330000      0.107810000      0.544710000
H       -4.533610000      1.725090000     -0.142090000
C       -6.128820000      1.324350000      1.269080000
H       -6.266020000      0.764020000      2.204870000
H       -6.312770000      2.379930000      1.515150000
C       -7.169650000      0.855740000      0.241970000
H       -6.986490000     -0.199840000     -0.004430000
H       -7.033040000      1.415220000     -0.694450000
C       -8.620370000      1.017550000      0.719070000
H       -8.758070000      0.458400000      1.654460000
H       -8.805250000      2.072280000      0.963970000
C       -9.653590000      0.545790000     -0.312830000
H       -9.518050000     -0.515570000     -0.553090000
H      -10.676780000      0.674520000      0.058040000
H       -9.565650000      1.110310000     -1.248870000
C       -3.046810000     -1.458380000     -5.037560000
F       -3.792630000     -2.593600000     -5.077860000
F       -3.900220000     -0.418200000     -5.205930000
F       -2.252110000     -1.487590000     -6.147890000
C       -2.208600000     -4.256240000      4.582240000
F       -1.579150000     -5.458520000      4.739910000
F       -2.116820000     -3.623480000      5.781110000
F       -3.520520000     -4.536850000      4.382090000
C        5.069250000     -4.558320000     -1.924440000
F        6.034900000     -3.827600000     -2.541870000
F        5.677570000     -5.270510000     -0.944340000
F        4.634020000     -5.465900000     -2.847180000
106                    
TS3, CsRhC45PNH44O3F10                                           
C        4.225810000      1.499590000      0.581200000
C        3.006050000      3.428440000      1.030980000
C        4.197590000      4.186190000      1.262480000
C        5.438260000      3.506920000      1.128230000
C        5.451300000      2.170530000      0.789800000
H        4.230590000      0.449470000      0.311070000
C        1.706270000      4.040960000      1.148160000
C        4.099530000      5.559020000      1.611980000
H        6.367340000      4.049320000      1.295230000
H        6.381290000      1.619360000      0.679370000
C        2.845590000      6.138120000      1.725440000
C        1.664530000      5.399540000      1.500540000
H        5.005560000      6.133720000      1.788090000
H        2.761120000      7.188960000      1.997000000
H        0.692870000      5.878160000      1.604850000
N        3.039540000      2.092020000      0.693240000
O        0.617600000      3.330310000      0.928190000
Rh       1.002740000      1.286920000      0.477470000
F        0.467290000      2.187900000     -2.373660000
Cs      -1.516820000      4.479430000     -1.117760000
P        1.474140000     -0.935320000      0.064640000
C        2.053020000     -1.847620000      1.575770000
C        2.495140000     -1.105840000      2.682080000
C        2.055440000     -3.252100000      1.658750000
C        2.944130000     -1.745300000      3.841100000
H        2.479880000     -0.019830000      2.648090000
C        2.499410000     -3.897590000      2.812730000
H        1.705520000     -3.855850000      0.825410000
C        2.948880000     -3.141480000      3.902920000
H        3.284860000     -1.153740000      4.686600000
H        2.499020000     -4.983930000      2.857050000
C        0.138070000     -2.067420000     -0.543560000
C        0.115940000     -2.587330000     -1.844470000
C       -0.917350000     -2.384440000      0.331880000
C       -0.932380000     -3.412480000     -2.267190000
H        0.913910000     -2.365980000     -2.546240000
C       -1.958460000     -3.213030000     -0.079250000
H       -0.929790000     -1.988110000      1.342900000
C       -1.968180000     -3.724570000     -1.384630000
H       -0.932250000     -3.805470000     -3.280150000
H       -2.763560000     -3.449800000      0.612190000
C        2.829740000     -1.212150000     -1.177820000
C        2.831570000     -0.404910000     -2.330670000
C        3.849180000     -2.164750000     -1.021830000
C        3.814210000     -0.557530000     -3.309630000
H        2.068250000      0.355620000     -2.468540000
C        4.843350000     -2.314270000     -1.993030000
H        3.893830000     -2.793320000     -0.138450000
C        4.824620000     -1.510830000     -3.136900000
H        3.797550000      0.075930000     -4.192960000
H        5.630070000     -3.049930000     -1.847820000
C       -3.406860000      0.490900000     -0.208770000
C       -2.164080000      0.850990000      0.541500000
H       -4.150810000      1.279730000     -0.034380000
C       -0.904280000      0.934450000      0.397150000
H        0.599120000      1.818720000     -1.464200000
H       -3.838060000     -0.416710000      0.235610000
C       -6.775630000      0.511100000      2.547810000
H       -7.213780000      0.975500000      3.438900000
H       -7.252510000      0.966150000      1.671480000
C       -4.970830000      2.098050000      2.500140000
C       -3.561830000      2.298200000      2.454600000
C       -2.576230000      1.278980000      2.340910000
H       -2.878830000      0.273510000      2.630650000
O       -5.359540000      0.766860000      2.514250000
O       -5.835590000      3.001280000      2.568120000
H       -3.250280000      3.340090000      2.454190000
H       -1.591150000      1.533730000      2.717130000
C       -6.982250000     -0.999210000      2.560150000
H       -6.469650000     -1.423870000      3.433070000
H       -6.505680000     -1.433280000      1.671780000
C       -8.468110000     -1.386020000      2.593010000
H       -8.941630000     -0.942190000      3.478930000
H       -8.977990000     -0.951560000      1.722740000
C       -8.689780000     -2.904350000      2.605550000
H       -8.222220000     -3.366040000      3.483240000
H       -9.757270000     -3.149970000      2.628900000
H       -8.258810000     -3.375290000      1.714140000
C       -3.212180000      0.280470000     -1.719200000
H       -2.480380000     -0.519110000     -1.883080000
H       -2.778100000      1.188220000     -2.158870000
C       -4.522930000     -0.063530000     -2.441350000
H       -4.952090000     -0.974670000     -2.000930000
H       -5.256970000      0.735880000     -2.265310000
C       -4.351390000     -0.266640000     -3.953790000
H       -3.617630000     -1.065690000     -4.131480000
H       -3.922750000      0.644330000     -4.395900000
C       -5.658990000     -0.612240000     -4.681060000
H       -6.087130000     -1.523460000     -4.241820000
H       -6.393040000      0.185700000     -4.504520000
C       -5.477880000     -0.812020000     -6.191770000
H       -4.775800000     -1.627640000     -6.402580000
H       -6.428080000     -1.057090000     -6.679730000
H       -5.083930000      0.094260000     -6.667310000
C        5.865990000     -1.699040000     -4.209190000
F        7.028880000     -2.197280000     -3.721180000
F        5.448660000     -2.569250000     -5.173840000
F        6.165760000     -0.539050000     -4.846290000
C       -3.081570000     -4.645060000     -1.806020000
F       -3.179570000     -4.766000000     -3.152540000
F       -2.913840000     -5.908160000     -1.315770000
F       -4.293970000     -4.225110000     -1.356270000
C        3.384450000     -3.845060000      5.162030000
F        4.201890000     -3.081980000      5.927750000
F        2.322000000     -4.183390000      5.948200000
F        4.047520000     -5.001010000      4.901280000
106                   
INT3, CsRhC45PNH44O3F10                                           
C        3.960610000      2.060960000     -0.007990000
C        2.476450000      3.834910000      0.253960000
C        3.539650000      4.791680000      0.216100000
C        4.859160000      4.293100000      0.050820000
C        5.068270000      2.934680000     -0.061960000
H        4.118260000      0.991730000     -0.096950000
C        1.108280000      4.256150000      0.413050000
C        3.243860000      6.174520000      0.343130000
H        5.694680000      4.990190000      0.015120000
H        6.064180000      2.519360000     -0.189660000
C        1.925780000      6.569360000      0.504360000
C        0.870300000      5.633130000      0.540940000
H        4.052400000      6.900850000      0.315450000
H        1.689560000      7.626900000      0.607670000
H       -0.154280000      5.973290000      0.676410000
N        2.706710000      2.480200000      0.144240000
O        0.136790000      3.361560000      0.435470000
Rh       0.817220000      1.354300000      0.296160000
F       -0.229470000      1.945980000     -2.564510000
Cs      -2.649970000      3.965220000     -1.006950000
P        1.635230000     -0.821030000      0.223840000
C        2.539200000     -1.304270000      1.769690000
C        2.946090000     -0.301010000      2.662570000
C        2.813490000     -2.647080000      2.088110000
C        3.628890000     -0.623630000      3.838860000
H        2.719040000      0.740570000      2.453140000
C        3.492260000     -2.976360000      3.261000000
H        2.491610000     -3.449300000      1.429140000
C        3.900330000     -1.961610000      4.136290000
H        3.931510000      0.166310000      4.520840000
H        3.692680000     -4.019500000      3.493000000
C        0.470570000     -2.246010000      0.028000000
C        0.448880000     -3.057870000     -1.113380000
C       -0.444880000     -2.504180000      1.065720000
C       -0.467300000     -4.110490000     -1.222920000
H        1.145430000     -2.891510000     -1.929160000
C       -1.353110000     -3.554790000      0.965570000
H       -0.447870000     -1.890140000      1.961770000
C       -1.364540000     -4.359150000     -0.183290000
H       -0.467010000     -4.732710000     -2.113460000
H       -2.047450000     -3.746190000      1.780380000
C        2.856250000     -1.093250000     -1.145440000
C        2.564680000     -0.517890000     -2.395740000
C        4.042850000     -1.829200000     -0.999890000
C        3.428760000     -0.685410000     -3.478420000
H        1.659630000      0.068390000     -2.530300000
C        4.917980000     -1.990640000     -2.077490000
H        4.307640000     -2.277360000     -0.047560000
C        4.607040000     -1.423460000     -3.317170000
H        3.182040000     -0.240720000     -4.439100000
H        5.833120000     -2.562040000     -1.945590000
C       -3.258360000     -0.187180000     -0.139750000
C       -2.215350000      0.484670000      0.728700000
H       -4.142780000      0.462690000     -0.146400000
C       -0.965470000      0.725210000      0.479490000
H        0.063350000      1.691800000     -1.670190000
H       -3.577980000     -1.104060000      0.375800000
C       -6.995740000      0.590200000      2.014480000
H       -7.496670000      1.135160000      2.823920000
H       -7.330520000      1.035490000      1.068420000
C       -5.058340000      2.027380000      2.125760000
C       -3.660710000      2.093220000      2.172680000
C       -2.726520000      0.944700000      2.190970000
H       -3.189870000      0.038910000      2.597320000
O       -5.573930000      0.717690000      2.139810000
O       -5.870830000      2.997250000      2.101560000
H       -3.239960000      3.095850000      2.212400000
H       -1.837590000      1.156450000      2.788560000
C       -7.346490000     -0.893590000      2.064420000
H       -6.982730000     -1.315590000      3.010660000
H       -6.811130000     -1.415760000      1.260760000
C       -8.855320000     -1.146750000      1.931490000
H       -9.386700000     -0.616600000      2.733290000
H       -9.216200000     -0.715390000      0.988030000
C       -9.219470000     -2.636640000      1.980000000
H       -8.904240000     -3.091060000      2.926760000
H      -10.300640000     -2.785960000      1.882660000
H       -8.732230000     -3.190340000      1.168650000
C       -2.834970000     -0.526960000     -1.575100000
H       -1.970630000     -1.201210000     -1.552580000
H       -2.498230000      0.383610000     -2.087060000
C       -3.968580000     -1.177150000     -2.381840000
H       -4.297900000     -2.093970000     -1.872840000
H       -4.838420000     -0.504740000     -2.393810000
C       -3.573650000     -1.515470000     -3.826670000
H       -2.703880000     -2.187740000     -3.817170000
H       -3.244520000     -0.598860000     -4.336950000
C       -4.704200000     -2.165280000     -4.637620000
H       -5.032230000     -3.082640000     -4.130260000
H       -5.573980000     -1.494380000     -4.647640000
C       -4.301400000     -2.497720000     -6.080590000
H       -3.455670000     -3.195370000     -6.105610000
H       -5.129200000     -2.959220000     -6.630870000
H       -4.001430000     -1.595180000     -6.626560000
C        5.569950000     -1.558660000     -4.468570000
F        6.466080000     -0.530680000     -4.502970000
F        6.298670000     -2.700230000     -4.401050000
F        4.940260000     -1.557750000     -5.669810000
C       -2.378000000     -5.467300000     -0.289880000
F       -3.634580000     -4.987290000     -0.519300000
F       -2.105400000     -6.332330000     -1.296060000
F       -2.457840000     -6.200120000      0.852880000
C        4.667910000     -2.324700000      5.381490000
F        4.616880000     -1.354610000      6.325750000
F        4.205290000     -3.464850000      5.955380000
F        5.988760000     -2.539190000      5.116220000
106                      
TS4, CsRhC45PNH44O3F10                                            
C       -1.247720000     -3.298910000     -1.905800000
C        0.907670000     -2.833440000     -2.653220000
C        0.922390000     -4.000340000     -3.481240000
C       -0.237860000     -4.818820000     -3.474280000
C       -1.316240000     -4.472150000     -2.687430000
H       -2.095110000     -3.015400000     -1.291520000
C        2.049410000     -1.957430000     -2.587790000
C        2.072190000     -4.293760000     -4.260600000
H       -0.263960000     -5.715930000     -4.090630000
H       -2.218060000     -5.077350000     -2.656290000
C        3.162260000     -3.441330000     -4.198070000
C        3.159320000     -2.292400000     -3.378580000
H        2.081930000     -5.179720000     -4.890660000
H        4.049370000     -3.657370000     -4.790710000
H        4.035180000     -1.647950000     -3.347430000
N       -0.184500000     -2.498670000     -1.882060000
O        2.026810000     -0.894100000     -1.804830000
Rh       0.206670000     -0.657330000     -0.732370000
F       -0.445600000      1.375140000     -2.985420000
Cs       4.342230000      1.370910000     -1.647020000
P       -1.810220000     -0.437590000      0.413560000
C       -1.974230000     -1.619390000      1.831080000
C       -1.123310000     -2.734580000      1.879810000
C       -2.916050000     -1.439020000      2.860230000
C       -1.216470000     -3.660270000      2.922450000
H       -0.372110000     -2.881870000      1.108360000
C       -3.011840000     -2.357110000      3.906070000
H       -3.579970000     -0.578350000      2.859160000
C       -2.163920000     -3.471320000      3.932540000
H       -0.551160000     -4.519340000      2.942190000
H       -3.748560000     -2.204990000      4.690830000
C       -2.223030000      1.181960000      1.210420000
C       -3.167330000      2.064840000      0.668870000
C       -1.526680000      1.561640000      2.372400000
C       -3.416930000      3.301780000      1.272770000
H       -3.728590000      1.803290000     -0.222550000
C       -1.776280000      2.788820000      2.982640000
H       -0.793380000      0.895680000      2.818120000
C       -2.723940000      3.661320000      2.430510000
H       -4.157360000      3.970070000      0.841770000
H       -1.236420000      3.059880000      3.886700000
C       -3.301940000     -0.763810000     -0.642090000
C       -3.302510000     -0.253410000     -1.953370000
C       -4.420830000     -1.486140000     -0.197370000
C       -4.399930000     -0.447050000     -2.793680000
H       -2.446350000      0.298440000     -2.331070000
C       -5.517560000     -1.692070000     -1.038440000
H       -4.452070000     -1.907000000      0.802280000
C       -5.508570000     -1.166890000     -2.334180000
H       -4.385540000     -0.037160000     -3.800390000
H       -6.373820000     -2.255180000     -0.676540000
C        1.500030000      3.213640000      0.714430000
C        1.574420000      1.703360000      0.896950000
H        2.527910000      3.588290000      0.599960000
C        0.920370000      0.815710000      0.209970000
H       -0.176540000      0.838010000     -2.220300000
H        1.142760000      3.633470000      1.666100000
C        7.056380000     -0.404690000      1.544930000
H        7.232560000      0.098770000      0.585820000
H        7.434820000      0.259800000      2.333070000
C        4.815820000      0.498040000      1.732240000
C        3.495250000      0.200060000      2.046790000
C        2.463690000      1.255430000      2.168100000
H        2.940360000      2.196510000      2.462690000
O        5.656160000     -0.643140000      1.733370000
O        5.326090000      1.622880000      1.434810000
H        3.219790000     -0.840490000      2.197990000
H        1.728370000      1.006860000      2.942450000
C        7.777450000     -1.748580000      1.585360000
H        7.360860000     -2.401070000      0.806380000
H        7.572560000     -2.236630000      2.547320000
C        9.294040000     -1.610860000      1.387770000
H        9.493750000     -1.116590000      0.427390000
H        9.704750000     -0.950310000      2.163230000
C       10.028490000     -2.957620000      1.427510000
H        9.666050000     -3.630080000      0.640920000
H       11.106980000     -2.827710000      1.283790000
H        9.878870000     -3.462290000      2.389340000
C        0.624510000      3.732690000     -0.431960000
H       -0.404410000      3.380670000     -0.291400000
H        0.966600000      3.304860000     -1.382620000
C        0.634270000      5.265570000     -0.527610000
H        0.285770000      5.691460000      0.423830000
H        1.668190000      5.615580000     -0.659400000
C       -0.232020000      5.810740000     -1.672260000
H       -1.266250000      5.461740000     -1.542310000
H        0.115500000      5.385560000     -2.624610000
C       -0.225380000      7.343070000     -1.771470000
H       -0.573490000      7.768740000     -0.820590000
H        0.807700000      7.692780000     -1.902430000
C       -1.093490000      7.879610000     -2.917500000
H       -2.140590000      7.576870000     -2.797060000
H       -1.066950000      8.974340000     -2.960620000
H       -0.749260000      7.500130000     -3.887090000
C       -6.670520000     -1.422740000     -3.259220000
F       -6.482480000     -2.545890000     -4.010240000
F       -7.835630000     -1.600110000     -2.588880000
F       -6.865060000     -0.405310000     -4.135020000
C       -2.953350000      5.003750000      3.072350000
F       -4.137200000      5.558130000      2.714660000
F       -2.940720000      4.933780000      4.429130000
F       -1.985780000      5.903630000      2.729730000
C       -2.239830000     -4.436880000      5.087520000
F       -1.796680000     -5.674590000      4.757370000
F       -1.482580000     -4.023780000      6.143930000
F       -3.505250000     -4.578370000      5.556770000
106                   
INT4, CsRhC45PNH44O3F10                                          
C        0.298530000     -2.551120000      2.654660000
C       -1.999000000     -2.324490000      2.406970000
C       -2.254930000     -3.223650000      3.491450000
C       -1.128110000     -3.784090000      4.153310000
C        0.141820000     -3.449110000      3.735560000
H        1.295540000     -2.279090000      2.324990000
C       -3.090320000     -1.712450000      1.679810000
C       -3.594130000     -3.520130000      3.861070000
H       -1.280860000     -4.472510000      4.982880000
H        1.026310000     -3.858070000      4.217200000
C       -4.633730000     -2.931320000      3.157540000
C       -4.396270000     -2.044710000      2.086950000
H       -3.784800000     -4.203910000      4.684850000
H       -5.663300000     -3.156570000      3.431740000
H       -5.232730000     -1.605350000      1.546860000
N       -0.723000000     -2.001420000      2.003730000
O       -2.846940000     -0.882320000      0.693680000
Rh      -0.754930000     -0.622010000      0.243630000
F       -1.129410000      1.485780000      2.311320000
Cs      -4.114160000      1.920970000      1.292520000
P        1.468940000     -0.469630000     -0.228690000
C        2.126990000     -2.031220000     -1.019010000
C        1.394550000     -3.218770000     -0.856970000
C        3.314290000     -2.075280000     -1.771830000
C        1.836550000     -4.420330000     -1.416330000
H        0.462960000     -3.202170000     -0.298150000
C        3.761780000     -3.269810000     -2.338900000
H        3.902330000     -1.174890000     -1.927550000
C        3.023580000     -4.445220000     -2.155660000
H        1.255180000     -5.327920000     -1.275330000
H        4.684680000     -3.282040000     -2.913260000
C        2.167080000      0.794620000     -1.403320000
C        3.035010000      1.819040000     -1.002110000
C        1.773170000      0.739540000     -2.753960000
C        3.505850000      2.765300000     -1.920190000
H        3.363280000      1.895030000      0.029770000
C        2.243790000      1.670340000     -3.676150000
H        1.105670000     -0.045240000     -3.096800000
C        3.109970000      2.691060000     -3.256530000
H        4.178380000      3.550560000     -1.586350000
H        1.930880000      1.605410000     -4.715740000
C        2.600660000     -0.254760000      1.241840000
C        2.187900000      0.628990000      2.255320000
C        3.828730000     -0.919690000      1.393860000
C        2.984310000      0.856060000      3.379420000
H        1.231670000      1.137630000      2.177600000
C        4.625920000     -0.707780000      2.521950000
H        4.178690000     -1.618090000      0.640710000
C        4.206220000      0.186680000      3.512050000
H        2.649300000      1.549720000      4.146450000
H        5.571710000     -1.234800000      2.619480000
C       -0.972340000      3.124790000     -1.671870000
C       -1.373340000      1.704790000     -1.960980000
H       -1.841240000      3.775850000     -1.864260000
C       -1.268420000      0.468600000     -1.390580000
H       -0.912040000      0.825450000      1.572040000
H       -0.232220000      3.420350000     -2.433860000
C       -5.449940000     -1.174260000     -2.211040000
H       -5.530680000     -1.904500000     -3.022400000
H       -5.359410000     -1.722230000     -1.267820000
C       -3.088310000     -1.079850000     -2.526700000
C       -1.870310000     -0.213280000     -2.681940000
C       -1.999130000      1.227950000     -3.261480000
H       -3.025110000      1.559650000     -3.461680000
O       -4.244450000     -0.389050000     -2.403780000
O       -3.054330000     -2.308470000     -2.513990000
H       -1.129520000     -0.829400000     -3.204600000
H       -1.396360000      1.388610000     -4.168740000
C       -6.637370000     -0.221720000     -2.198980000
H       -6.657620000      0.338200000     -3.142660000
H       -6.501540000      0.513890000     -1.395780000
C       -7.969660000     -0.961340000     -2.005570000
H       -8.096530000     -1.699990000     -2.807980000
H       -7.939330000     -1.529620000     -1.066500000
C       -9.177870000     -0.015860000     -1.989340000
H       -9.257130000      0.542320000     -2.929550000
H      -10.112500000     -0.570110000     -1.850800000
H       -9.099280000      0.714220000     -1.175080000
C       -0.403760000      3.450360000     -0.285440000
H        0.436340000      2.782910000     -0.068860000
H       -1.151830000      3.243000000      0.487350000
C        0.057070000      4.910860000     -0.167360000
H        0.829300000      5.109200000     -0.924440000
H       -0.783160000      5.578680000     -0.408530000
C        0.606590000      5.275940000      1.219010000
H        1.445720000      4.609000000      1.463610000
H       -0.164930000      5.083240000      1.978190000
C        1.072690000      6.734680000      1.332610000
H        1.845350000      6.927620000      0.575900000
H        0.234780000      7.402330000      1.089490000
C        1.620510000      7.091150000      2.721100000
H        2.482600000      6.464690000      2.980020000
H        1.944050000      8.137260000      2.767910000
H        0.860070000      6.943310000      3.497400000
C        5.042490000      0.383740000      4.748080000
F        4.724300000     -0.512020000      5.728430000
F        6.368980000      0.227050000      4.506730000
F        4.881060000      1.616310000      5.292380000
C        3.629140000      3.672650000     -4.270220000
F        4.231760000      4.746370000     -3.703180000
F        4.550650000      3.108950000     -5.106060000
F        2.641400000      4.153370000     -5.074280000
C        3.479510000     -5.724210000     -2.805610000
F        3.074490000     -6.825680000     -2.124570000
F        2.989510000     -5.856180000     -4.073300000
F        4.831010000     -5.798100000     -2.911850000
106                    
TS5, CsRhC45PNH44O3F10                                           
C        0.578860000     -3.182430000      1.669720000
C       -1.575620000     -3.495650000      0.851490000
C       -1.663340000     -4.795160000      1.442750000
C       -0.540240000     -5.254360000      2.183630000
C        0.567190000     -4.443640000      2.305630000
H        1.455310000     -2.551940000      1.756660000
C       -2.692120000     -2.930490000      0.134200000
C       -2.849940000     -5.558930000      1.281360000
H       -0.569680000     -6.236790000      2.651610000
H        1.440990000     -4.753870000      2.872590000
C       -3.907600000     -5.021840000      0.562720000
C       -3.842010000     -3.731150000     -0.001070000
H       -2.913470000     -6.549650000      1.724840000
H       -4.818420000     -5.604060000      0.432070000
H       -4.689900000     -3.329400000     -0.552440000
N       -0.440520000     -2.711640000      0.951600000
O       -2.612620000     -1.707000000     -0.331010000
Rh      -0.654940000     -0.868000000     -0.119330000
F       -2.728520000      1.262760000      0.702860000
Cs      -4.795370000     -0.411170000      1.880750000
P        1.558930000     -0.277090000     -0.089490000
C       -0.634170000      3.379590000     -1.446570000
C       -1.014880000      2.025380000     -1.956920000
H       -1.349380000      4.098010000     -1.878760000
C       -1.315140000      0.793110000     -1.431880000
H       -1.943740000      0.866630000     -0.296170000
H        0.332790000      3.651950000     -1.896590000
C       -5.452510000      0.365230000     -2.944420000
H       -5.576510000      0.264410000     -4.027610000
H       -5.694510000     -0.598710000     -2.485270000
C       -3.137510000     -0.193880000     -3.105200000
C       -1.721140000      0.247150000     -2.837910000
C       -1.346370000      1.669680000     -3.389980000
H       -2.175580000      2.232700000     -3.835320000
O       -4.064260000      0.681370000     -2.660000000
O       -3.435390000     -1.218570000     -3.711470000
H       -1.075250000     -0.551490000     -3.210750000
H       -0.503830000      1.672540000     -4.093970000
C        2.683570000     -1.555910000     -0.866730000
C        2.136040000     -2.765440000     -1.319270000
C        4.055610000     -1.321260000     -1.081450000
C        2.933120000     -3.728850000     -1.945770000
C        4.859620000     -2.277220000     -1.700870000
C        4.296820000     -3.487290000     -2.128270000
H        1.073290000     -2.949430000     -1.197010000
H        4.509500000     -0.379650000     -0.783980000
H        2.486820000     -4.658890000     -2.287600000
H        5.918060000     -2.077480000     -1.849810000
C        2.230670000     -0.051080000      1.637650000
C        1.391500000      0.629410000      2.539580000
C        3.466390000     -0.526400000      2.104880000
C        1.783570000      0.854900000      3.859370000
C        3.859730000     -0.321250000      3.430870000
C        3.022340000      0.377980000      4.305170000
H        0.415170000      0.974450000      2.208140000
H        4.136130000     -1.075100000      1.451300000
H        1.123660000      1.393750000      4.534690000
H        4.818990000     -0.701830000      3.772060000
C        2.260970000      1.208790000     -0.966610000
C        2.876970000      2.281110000     -0.308200000
C        2.196030000      1.227830000     -2.372160000
C        3.425730000      3.346370000     -1.031610000
C        2.747770000      2.278920000     -3.100360000
C        3.368490000      3.341210000     -2.426950000
H        2.951690000      2.298110000      0.774870000
H        1.726260000      0.407120000     -2.908800000
H        3.906100000      4.164920000     -0.502230000
H        2.699770000      2.267540000     -4.186510000
C       -0.575630000      3.577610000      0.073450000
H       -1.528910000      3.266160000      0.512670000
H        0.181310000      2.907850000      0.497220000
C       -0.246510000      5.025530000      0.463320000
H        0.714260000      5.317770000      0.015260000
H       -1.000720000      5.699210000      0.031020000
C       -0.183710000      5.250510000      1.980930000
H       -1.144770000      4.962120000      2.430340000
H        0.569380000      4.578260000      2.416770000
C        0.144100000      6.697460000      2.377250000
H        1.104700000      6.986540000      1.929530000
H       -0.608640000      7.370450000      1.944590000
C        0.205550000      6.911870000      3.895590000
H        0.440960000      7.953050000      4.143960000
H       -0.751970000      6.665260000      4.369970000
H        0.974270000      6.278650000      4.354730000
C       -6.313770000      1.487670000     -2.383030000
H       -6.007050000      2.437210000     -2.839600000
H       -6.126870000      1.578240000     -1.305560000
C       -7.810190000      1.249550000     -2.634410000
H       -7.988330000      1.151990000     -3.713440000
H       -8.108930000      0.292970000     -2.185430000
C       -8.692280000      2.372420000     -2.072950000
H       -8.563720000      2.473070000     -0.988790000
H       -8.442400000      3.337890000     -2.528140000
H       -9.752590000      2.176900000     -2.266340000
C        5.161880000     -4.494560000     -2.838210000
F        5.341960000     -4.175930000     -4.153260000
F        6.405050000     -4.577780000     -2.295910000
F        4.635110000     -5.743340000     -2.814910000
C        3.923500000      4.495750000     -3.215030000
F        4.873150000      5.184750000     -2.534420000
F        4.484900000      4.098960000     -4.387140000
F        2.956100000      5.401690000     -3.546610000
C        3.422710000      0.566720000      5.744220000
F        2.943410000      1.724620000      6.265910000
F        2.949660000     -0.435750000      6.541290000
F        4.768860000      0.583220000      5.910740000
106                   
INT5, CsRhC45PNH44O3F10                                           
C       -2.705350000     -1.512630000     -2.681430000
C       -1.582500000     -3.498830000     -2.172570000
C       -1.812570000     -4.020940000     -3.481470000
C       -2.530790000     -3.202680000     -4.395400000
C       -2.967460000     -1.957200000     -3.996500000
H       -3.043190000     -0.532820000     -2.363260000
C       -0.848080000     -4.243750000     -1.188210000
C       -1.315870000     -5.311170000     -3.805560000
H       -2.726130000     -3.565250000     -5.402910000
H       -3.513830000     -1.302450000     -4.669880000
C       -0.615360000     -6.028580000     -2.847800000
C       -0.377140000     -5.511930000     -1.555610000
H       -1.489080000     -5.717360000     -4.799040000
H       -0.233480000     -7.018070000     -3.092530000
H        0.179090000     -6.094360000     -0.824210000
N       -2.045120000     -2.249710000     -1.789700000
O       -0.643660000     -3.703970000      0.001620000
Rh      -1.567490000     -1.832680000      0.163380000
F        1.779190000      0.271980000      0.098390000
Cs       2.450150000     -2.542850000      0.330500000
P       -2.497400000      0.239680000      0.485280000
C        5.467590000      3.564910000      0.438350000
C        4.982860000      2.707200000      1.565340000
H        6.553170000      3.419630000      0.329500000
C        4.030300000      1.763120000      1.721660000
H        3.278520000      1.291970000      1.077330000
H        5.348670000      4.621530000      0.723350000
C        6.230590000     -1.659330000      3.278680000
H        6.669230000     -1.563050000      4.277030000
H        5.401140000     -2.371090000      3.339680000
C        4.776690000      0.192250000      3.680640000
C        4.323880000      1.555940000      3.209740000
C        5.455360000      2.641470000      3.011860000
H        6.477050000      2.275460000      3.164130000
O        5.703910000     -0.365010000      2.874860000
O        4.360770000     -0.358380000      4.694660000
H        3.528570000      1.876190000      3.890080000
H        5.307810000      3.546180000      3.614320000
C       -4.337490000      0.376880000      0.643690000
C       -5.139840000     -0.660050000      0.145300000
C       -4.953020000      1.470790000      1.278330000
C       -6.532220000     -0.603190000      0.259360000
C       -6.340940000      1.532000000      1.400500000
C       -7.129730000      0.495050000      0.884350000
H       -4.677680000     -1.526130000     -0.321480000
H       -4.353920000      2.282320000      1.684620000
H       -7.140780000     -1.412250000     -0.135810000
H       -6.803360000      2.385260000      1.890390000
C       -2.013310000      1.597140000     -0.669050000
C       -0.640030000      1.745290000     -0.956730000
C       -2.949460000      2.416750000     -1.318680000
C       -0.228790000      2.723960000     -1.862700000
C       -2.532570000      3.385390000     -2.237940000
C       -1.170750000      3.539060000     -2.506220000
H        0.133150000      1.115180000     -0.490230000
H       -4.012930000      2.309150000     -1.127830000
H        0.832180000      2.837810000     -2.074530000
H       -3.269760000      4.007270000     -2.737890000
C       -1.939560000      0.787860000      2.162150000
C       -1.202030000      1.954860000      2.408730000
C       -2.247570000     -0.064610000      3.240190000
C       -0.784980000      2.270100000      3.704450000
C       -1.831320000      0.244020000      4.535130000
C       -1.100820000      1.416100000      4.766230000
H       -0.949420000      2.631870000      1.598490000
H       -2.827930000     -0.971500000      3.076170000
H       -0.222050000      3.182980000      3.880920000
H       -2.083510000     -0.421370000      5.356800000
C        4.773570000      3.308830000     -0.906450000
H        4.907940000      2.255500000     -1.185760000
H        3.692070000      3.457430000     -0.789770000
C        5.294710000      4.207650000     -2.036720000
H        5.155260000      5.261550000     -1.757030000
H        6.378740000      4.061750000     -2.146700000
C        4.610490000      3.947620000     -3.386410000
H        4.750720000      2.893840000     -3.666840000
H        3.526030000      4.091630000     -3.277220000
C        5.125910000      4.844060000     -4.521620000
H        4.984100000      5.897320000     -4.243860000
H        6.209380000      4.700830000     -4.632440000
C        4.436640000      4.574890000     -5.866030000
H        4.825240000      5.230770000     -6.653340000
H        4.590910000      3.538670000     -6.190190000
H        3.354990000      4.741960000     -5.797310000
C        7.265260000     -2.086370000      2.247730000
H        8.052990000     -1.324550000      2.193320000
H        6.791490000     -2.126130000      1.258760000
C        7.883800000     -3.451690000      2.584200000
H        8.348750000     -3.407040000      3.577840000
H        7.089350000     -4.206890000      2.649460000
C        8.928200000     -3.899810000      1.553510000
H        8.486310000     -3.988290000      0.554100000
H        9.754910000     -3.182790000      1.489340000
H        9.351810000     -4.874570000      1.818430000
C       -0.690040000      4.594070000     -3.466450000
F       -0.075730000      5.628360000     -2.822100000
F        0.223290000      4.106420000     -4.349490000
F       -1.693430000      5.137010000     -4.197920000
C       -8.625570000      0.542930000      1.059480000
F       -9.111090000      1.808840000      0.995240000
F       -9.281370000     -0.182810000      0.120790000
F       -9.011130000      0.046150000      2.270380000
C       -0.610850000      1.730140000      6.155250000
F       -0.459490000      3.062090000      6.362670000
F       -1.452250000      1.270940000      7.116040000
F        0.604140000      1.161700000      6.406930000
45                    
3a...CsF, CsC15H26O2F                                          
F       -1.230240000      0.654470000      0.988520000
Cs       0.454800000     -1.572660000      0.358110000
C       -5.226940000      2.642170000     -1.011740000
C       -4.492030000      1.444930000     -1.529540000
H       -6.270310000      2.354150000     -0.811000000
C       -3.386700000      0.760500000     -1.163840000
H       -2.642570000      0.818220000     -0.354810000
H       -5.288120000      3.392300000     -1.815120000
C       -4.876700000     -3.375080000     -0.892700000
H       -4.849380000     -4.020650000     -1.776330000
H       -4.029480000     -3.639630000     -0.252000000
C       -3.590990000     -1.686080000     -1.987080000
C       -3.483200000     -0.221720000     -2.343540000
C       -4.785820000      0.567230000     -2.739780000
H       -5.711140000     -0.016290000     -2.692770000
O       -4.721710000     -1.993450000     -1.320810000
O       -2.725280000     -2.517340000     -2.244490000
H       -2.672280000     -0.133730000     -3.073960000
H       -4.722110000      1.057410000     -3.719550000
C       -4.613770000      3.276850000      0.244040000
H       -4.560400000      2.522710000      1.040060000
H       -3.576850000      3.568030000      0.031220000
C       -5.395240000      4.498430000      0.747960000
H       -5.450340000      5.250550000     -0.051940000
H       -6.432560000      4.203820000      0.961770000
C       -4.782770000      5.138480000      2.002110000
H       -4.725750000      4.386540000      2.802080000
H       -3.745770000      5.434510000      1.788530000
C       -5.560600000      6.359960000      2.512970000
H       -5.618160000      7.112340000      1.714650000
H       -6.596360000      6.064930000      2.729420000
C       -4.939470000      6.993200000      3.765270000
H       -5.517620000      7.860440000      4.103990000
H       -4.899290000      6.276020000      4.593910000
H       -3.914560000      7.331820000      3.571580000
C       -6.200530000     -3.489560000     -0.151230000
H       -7.013700000     -3.175340000     -0.817480000
H       -6.197100000     -2.794720000      0.697840000
C       -6.458900000     -4.919630000      0.347030000
H       -6.452190000     -5.610710000     -0.506150000
H       -5.635820000     -5.232120000      1.003180000
C       -7.788780000     -5.053810000      1.100280000
H       -7.813510000     -4.400740000      1.980390000
H       -8.636190000     -4.781700000      0.460300000
H       -7.946530000     -6.082050000      1.443330000
43               
3a, C15H26O2                                           
C       -4.470120000     -4.027840000     -0.146720000
C       -4.346020000     -3.054170000      0.981500000
H       -5.531060000     -4.103300000     -0.428520000
C       -3.655550000     -1.917830000      1.203580000
H       -2.957760000     -1.329740000      0.610850000
H       -4.200530000     -5.028600000      0.222870000
C       -6.521010000      1.148030000      2.205300000
H       -7.259130000      0.856820000      2.959320000
H       -5.910240000      1.955770000      2.620350000
C       -4.982800000     -0.504990000      2.982760000
C       -4.168590000     -1.728770000      2.624190000
C       -5.013160000     -3.042020000      2.352110000
H       -6.099240000     -2.894700000      2.346720000
O       -5.658150000      0.006130000      1.935730000
O       -5.047670000     -0.039460000      4.114750000
H       -3.424120000     -1.861210000      3.415260000
H       -4.768880000     -3.874350000      3.022170000
C       -7.180400000      1.553400000      0.895340000
H       -6.401370000      1.792620000      0.160730000
H       -7.742810000      0.699520000      0.497460000
C       -8.117670000      2.757860000      1.071580000
H       -8.888080000      2.515710000      1.815430000
H       -7.551100000      3.605290000      1.479430000
C       -8.791740000      3.180410000     -0.240290000
H       -8.048460000      3.462750000     -0.994960000
H       -9.395240000      2.365350000     -0.656440000
H       -9.453080000      4.039770000     -0.085580000
C       -3.625540000     -3.682460000     -1.381650000
H       -2.569150000     -3.615750000     -1.089830000
H       -3.908400000     -2.685830000     -1.745360000
C       -3.777620000     -4.702920000     -2.518810000
H       -3.496180000     -5.700020000     -2.151750000
H       -4.836320000     -4.770730000     -2.806380000
C       -2.937290000     -4.364100000     -3.758360000
H       -1.878230000     -4.295990000     -3.471440000
H       -3.218240000     -3.366790000     -4.125750000
C       -3.086430000     -5.381980000     -4.898480000
H       -2.804700000     -6.378730000     -4.532850000
H       -4.144240000     -5.450250000     -5.186510000
C       -2.243880000     -5.035830000     -6.133450000
H       -1.176270000     -4.994540000     -5.886340000
H       -2.372790000     -5.780640000     -6.926950000
H       -2.525890000     -4.059260000     -6.544960000
12
2a-s1, C4H6O2
C        0.576770000      0.496980000     -0.000080000
H        0.568150000      1.127430000     -0.892280000
H        0.568390000      1.126760000      0.892610000
C       -1.779970000      0.205380000      0.000120000
C       -2.865000000     -0.810360000     -0.000060000
C       -4.155690000     -0.452100000      0.000350000
H       -4.446310000      0.595850000      0.000830000
O       -0.565550000     -0.389880000     -0.000250000
O       -1.934310000      1.419730000      0.000620000
H       -2.560050000     -1.854090000     -0.000540000
H       -4.946570000     -1.197590000      0.000220000
H        1.450010000     -0.154980000     -0.000440000
7
2a-s2, C3NH3
C       -1.298160000     -0.587950000     -0.000030000
C       -2.506050000     -0.001440000      0.000040000
H       -2.621260000      1.079220000      0.000090000
H       -1.187620000     -1.671140000     -0.000070000
H       -3.408840000     -0.606040000      0.000060000
C       -0.074250000      0.164940000     -0.000050000
N        0.934120000      0.752420000     -0.000070000
6           
2a-s3, C2H4
C        1.493990000      0.370430000     -0.000140000
C        2.186300000     -0.774210000      0.000060000
H        1.688460000     -1.742300000      0.000060000
H        1.992290000      1.338080000     -0.000180000
H        3.274660000     -0.784420000      0.000190000
H        0.405350000      0.379850000     -0.000320000
9           
2a-s4, C3H6
C       -2.028920000     -3.665180000      2.975710000
C       -0.795900000     -3.303420000      2.597020000
H       -0.083830000     -4.027660000      2.202930000
H       -2.703490000     -2.899320000      3.363680000
H       -0.459210000     -2.271370000      2.669300000
C       -2.582590000     -5.063570000      2.913810000
H       -1.849380000     -5.771270000      2.514630000
H       -2.887430000     -5.408750000      3.909920000
H       -3.478450000     -5.102630000      2.281190000
85
INT2-s1, CsRhC38PNH32OF10                                         
C       -3.578820000      1.682720000      0.028500000
C       -2.456190000      3.560150000     -0.757560000
C       -3.645470000      4.354460000     -0.704670000
C       -4.834550000      3.719660000     -0.252810000
C       -4.799930000      2.390000000      0.108120000
H       -3.545900000      0.638860000      0.319740000
C       -1.210270000      4.124710000     -1.218600000
C       -3.597730000      5.717570000     -1.100430000
H       -5.760320000      4.289990000     -0.198590000
H       -5.689210000      1.870660000      0.455540000
C       -2.395130000      6.252560000     -1.536710000
C       -1.218120000      5.478090000     -1.599410000
H       -4.501990000      6.320030000     -1.058810000
H       -2.351610000      7.296270000     -1.843820000
H       -0.289470000      5.920540000     -1.954380000
N       -2.438840000      2.232000000     -0.384330000
O       -0.129350000      3.377180000     -1.272400000
Rh      -0.447880000      1.354840000     -0.657200000
F        0.764840000      2.146660000      1.971690000
Cs       2.535000000      4.186860000      0.192450000
P       -0.825380000     -0.809630000     -0.023970000
C       -1.715770000     -1.808610000     -1.320000000
C       -2.423990000     -1.120410000     -2.317830000
C       -1.706800000     -3.214830000     -1.349710000
C       -3.118880000     -1.812280000     -3.313620000
H       -2.421630000     -0.033590000     -2.327280000
C       -2.393360000     -3.914100000     -2.343180000
H       -1.156940000     -3.779110000     -0.601120000
C       -3.099850000     -3.210250000     -3.326540000
H       -3.656870000     -1.260560000     -4.079970000
H       -2.370010000     -5.001010000     -2.352170000
C        0.603290000     -1.931470000      0.364410000
C        0.914420000     -2.340770000      1.668040000
C        1.441170000     -2.341030000     -0.689560000
C        2.030790000     -3.146330000      1.920770000
H        0.291920000     -2.045500000      2.506810000
C        2.545750000     -3.154040000     -0.448190000
H        1.234530000     -2.024120000     -1.706880000
C        2.845240000     -3.553470000      0.862120000
H        2.254700000     -3.451420000      2.939280000
H        3.178210000     -3.463550000     -1.276810000
C       -1.897640000     -1.031980000      1.486260000
C       -1.678340000     -0.168120000      2.575750000
C       -2.907420000     -2.001740000      1.593350000
C       -2.434530000     -0.280490000      3.743340000
H       -0.915130000      0.602660000      2.516870000
C       -3.677280000     -2.111950000      2.755090000
H       -3.117390000     -2.678750000      0.771850000
C       -3.435810000     -1.254930000      3.832810000
H       -2.241820000      0.390750000      4.576650000
H       -4.455500000     -2.868300000      2.814880000
C        4.009610000      0.416200000     -1.855410000
C        2.626070000      0.729150000     -1.446230000
H        4.388300000      1.191620000     -2.537120000
C        1.455570000      0.919150000     -1.103750000
H        0.391400000      1.805950000      1.101390000
H        4.013710000     -0.517900000     -2.436200000
C        4.998850000      0.264690000     -0.678930000
H        4.629060000     -0.518130000     -0.005120000
H        5.008540000      1.195880000     -0.097030000
C        6.424550000     -0.072990000     -1.136080000
H        6.406060000     -1.000480000     -1.725980000
H        6.784620000      0.713360000     -1.814970000
C        7.417540000     -0.232360000      0.024270000
H        7.059410000     -1.019940000      0.702500000
H        7.436240000      0.694080000      0.616110000
C        8.845470000     -0.569020000     -0.429750000
H        8.828150000     -1.494830000     -1.020650000
H        9.205090000      0.218140000     -1.106310000
C        9.830790000     -0.727630000      0.735970000
H        9.898160000      0.193920000      1.326630000
H        9.518170000     -1.531800000      1.412810000
H       10.838550000     -0.967350000      0.378170000
C       -4.287540000     -1.337680000      5.071710000
F       -3.591600000     -1.034090000      6.197230000
F       -5.338630000     -0.467700000      5.026940000
F       -4.820350000     -2.571360000      5.254890000
C        4.022150000     -4.457530000      1.105330000
F        4.417340000     -4.467790000      2.402370000
F        3.749570000     -5.755090000      0.775850000
F        5.106620000     -4.103610000      0.364230000
C       -3.875580000     -3.968570000     -4.371130000
F       -3.261940000     -5.124720000     -4.732180000
F       -5.117990000     -4.319180000     -3.926790000
F       -4.064270000     -3.248390000     -5.504420000
85                                                    
INT2-s2, CsRhC38PNH32OF10                             
C       -3.578820000      1.682720000      0.028500000
C       -2.456190000      3.560150000     -0.757560000
C       -3.645470000      4.354460000     -0.704670000
C       -4.834550000      3.719660000     -0.252810000
C       -4.799930000      2.390000000      0.108120000
H       -3.545900000      0.638860000      0.319740000
C       -1.210270000      4.124710000     -1.218600000
C       -3.597730000      5.717570000     -1.100430000
H       -5.760320000      4.289990000     -0.198590000
H       -5.689210000      1.870660000      0.455540000
C       -2.395130000      6.252560000     -1.536710000
C       -1.218120000      5.478090000     -1.599410000
H       -4.501990000      6.320030000     -1.058810000
H       -2.351610000      7.296270000     -1.843820000
H       -0.289470000      5.920540000     -1.954380000
N       -2.438840000      2.232000000     -0.384330000
O       -0.129350000      3.377180000     -1.272400000
Rh      -0.447880000      1.354840000     -0.657200000
F        0.764840000      2.146660000      1.971690000
Cs       2.535000000      4.186860000      0.192450000
P       -0.825380000     -0.809630000     -0.023970000
C       -1.715770000     -1.808610000     -1.320000000
C       -2.423990000     -1.120410000     -2.317830000
C       -1.706800000     -3.214830000     -1.349710000
C       -3.118880000     -1.812280000     -3.313620000
H       -2.421630000     -0.033590000     -2.327280000
C       -2.393360000     -3.914100000     -2.343180000
H       -1.156940000     -3.779110000     -0.601120000
C       -3.099850000     -3.210250000     -3.326540000
H       -3.656870000     -1.260560000     -4.079970000
H       -2.370010000     -5.001010000     -2.352170000
C        0.603290000     -1.931470000      0.364410000
C        0.914420000     -2.340770000      1.668040000
C        1.441170000     -2.341030000     -0.689560000
C        2.030790000     -3.146330000      1.920770000
H        0.291920000     -2.045500000      2.506810000
C        2.545750000     -3.154040000     -0.448190000
H        1.234530000     -2.024120000     -1.706880000
C        2.845240000     -3.553470000      0.862120000
H        2.254700000     -3.451420000      2.939280000
H        3.178210000     -3.463550000     -1.276810000
C       -1.897640000     -1.031980000      1.486260000
C       -1.678340000     -0.168120000      2.575750000
C       -2.907420000     -2.001740000      1.593350000
C       -2.434530000     -0.280490000      3.743340000
H       -0.915130000      0.602660000      2.516870000
C       -3.677280000     -2.111950000      2.755090000
H       -3.117390000     -2.678750000      0.771850000
C       -3.435810000     -1.254930000      3.832810000
H       -2.241820000      0.390750000      4.576650000
H       -4.455500000     -2.868300000      2.814880000
C        4.009610000      0.416200000     -1.855410000
C        2.626070000      0.729150000     -1.446230000
H        4.388300000      1.191620000     -2.537120000
C        1.455570000      0.919150000     -1.103750000
H        0.391400000      1.805950000      1.101390000
H        4.013710000     -0.517900000     -2.436200000
C        4.998850000      0.264690000     -0.678930000
H        4.629060000     -0.518130000     -0.005120000
H        5.008540000      1.195880000     -0.097030000
C        6.424550000     -0.072990000     -1.136080000
H        6.406060000     -1.000480000     -1.725980000
H        6.784620000      0.713360000     -1.814970000
C        7.417540000     -0.232360000      0.024270000
H        7.059410000     -1.019940000      0.702500000
H        7.436240000      0.694080000      0.616110000
C        8.845470000     -0.569020000     -0.429750000
H        8.828150000     -1.494830000     -1.020650000
H        9.205090000      0.218140000     -1.106310000
C        9.830790000     -0.727630000      0.735970000
H        9.898160000      0.193920000      1.326630000
H        9.518170000     -1.531800000      1.412810000
H       10.838550000     -0.967350000      0.378170000
C       -4.287540000     -1.337680000      5.071710000
F       -3.591600000     -1.034090000      6.197230000
F       -5.338630000     -0.467700000      5.026940000
F       -4.820350000     -2.571360000      5.254890000
C        4.022150000     -4.457530000      1.105330000
F        4.417340000     -4.467790000      2.402370000
F        3.749570000     -5.755090000      0.775850000
F        5.106620000     -4.103610000      0.364230000
C       -3.875580000     -3.968570000     -4.371130000
F       -3.261940000     -5.124720000     -4.732180000
F       -5.117990000     -4.319180000     -3.926790000
F       -4.064270000     -3.248390000     -5.504420000
61                       
INT2-s3, CsRhC30PNH25OF                                           
C        0.005610000      3.168290000      0.291230000
C        2.148960000      2.496730000     -0.307320000
C        2.661320000      3.824650000     -0.156870000
C        1.743960000      4.837030000      0.237230000
C        0.422970000      4.509240000      0.453580000
H       -1.028970000      2.902320000      0.474940000
C        3.009130000      1.416670000     -0.732240000
C        4.035790000      4.080850000     -0.407420000
H        2.094260000      5.860490000      0.360520000
H       -0.307570000      5.257050000      0.751100000
C        4.856770000      3.035150000     -0.802360000
C        4.361810000      1.725020000     -0.966240000
H        4.423130000      5.090220000     -0.290620000
H        5.911070000      3.224670000     -0.998120000
H        5.025070000      0.925160000     -1.289650000
N        0.825910000      2.184450000     -0.070800000
O        2.517900000      0.208840000     -0.890480000
Rh       0.415320000      0.066650000     -0.479420000
F        1.207660000     -1.135000000      2.150260000
Cs       3.670280000     -2.358920000      0.491660000
P       -1.834430000     -0.055880000     -0.010050000
C       -2.899470000      0.593710000     -1.387400000
C       -2.320900000      1.468980000     -2.322490000
C       -4.259510000      0.261900000     -1.529590000
C       -3.081320000      2.008520000     -3.366610000
H       -1.266010000      1.719660000     -2.238930000
C       -5.019770000      0.795750000     -2.575140000
H       -4.731690000     -0.420900000     -0.827820000
C       -4.433480000      1.672910000     -3.496240000
H       -2.614360000      2.683000000     -4.081440000
H       -6.069650000      0.525790000     -2.669740000
C       -2.628940000     -1.698510000      0.335690000
C       -3.059490000     -2.073610000      1.617960000
C       -2.772060000     -2.620890000     -0.717640000
C       -3.621270000     -3.337730000      1.844580000
H       -2.969560000     -1.383970000      2.451770000
C       -3.343610000     -3.875890000     -0.495340000
H       -2.435180000     -2.360610000     -1.716270000
C       -3.768190000     -4.242190000      0.788970000
H       -3.949830000     -3.606970000      2.846450000
H       -3.454000000     -4.570580000     -1.325720000
C       -2.376640000      0.946540000      1.461980000
C       -1.568700000      0.918220000      2.614920000
C       -3.544790000      1.727510000      1.481870000
C       -1.927990000      1.638250000      3.758910000
H       -0.651210000      0.335680000      2.619410000
C       -3.898460000      2.458340000      2.623080000
H       -4.183570000      1.783150000      0.605800000
C       -3.093900000      2.413640000      3.766640000
H       -1.291800000      1.599060000      4.640870000
H       -4.803230000      3.062840000      2.614340000
H       -3.369290000      2.981590000      4.652870000
H       -4.210680000     -5.221070000      0.962270000
H       -5.024960000      2.085940000     -4.310750000
C        0.530540000     -4.390380000     -1.988230000
C        0.520520000     -3.003180000     -1.488870000
H        0.754800000     -4.436550000     -3.061650000
C        0.423890000     -1.847390000     -1.066070000
H        0.866250000     -0.769770000      1.271800000
H       -0.443060000     -4.874610000     -1.836340000
H        1.281240000     -5.007990000     -1.477850000
61                                                    
INT2-s4, CsRhC30PNH25OF                               
C        0.005610000      3.168290000      0.291230000
C        2.148960000      2.496730000     -0.307320000
C        2.661320000      3.824650000     -0.156870000
C        1.743960000      4.837030000      0.237230000
C        0.422970000      4.509240000      0.453580000
H       -1.028970000      2.902320000      0.474940000
C        3.009130000      1.416670000     -0.732240000
C        4.035790000      4.080850000     -0.407420000
H        2.094260000      5.860490000      0.360520000
H       -0.307570000      5.257050000      0.751100000
C        4.856770000      3.035150000     -0.802360000
C        4.361810000      1.725020000     -0.966240000
H        4.423130000      5.090220000     -0.290620000
H        5.911070000      3.224670000     -0.998120000
H        5.025070000      0.925160000     -1.289650000
N        0.825910000      2.184450000     -0.070800000
O        2.517900000      0.208840000     -0.890480000
Rh       0.415320000      0.066650000     -0.479420000
F        1.207660000     -1.135000000      2.150260000
Cs       3.670280000     -2.358920000      0.491660000
P       -1.834430000     -0.055880000     -0.010050000
C       -2.899470000      0.593710000     -1.387400000
C       -2.320900000      1.468980000     -2.322490000
C       -4.259510000      0.261900000     -1.529590000
C       -3.081320000      2.008520000     -3.366610000
H       -1.266010000      1.719660000     -2.238930000
C       -5.019770000      0.795750000     -2.575140000
H       -4.731690000     -0.420900000     -0.827820000
C       -4.433480000      1.672910000     -3.496240000
H       -2.614360000      2.683000000     -4.081440000
H       -6.069650000      0.525790000     -2.669740000
C       -2.628940000     -1.698510000      0.335690000
C       -3.059490000     -2.073610000      1.617960000
C       -2.772060000     -2.620890000     -0.717640000
C       -3.621270000     -3.337730000      1.844580000
H       -2.969560000     -1.383970000      2.451770000
C       -3.343610000     -3.875890000     -0.495340000
H       -2.435180000     -2.360610000     -1.716270000
C       -3.768190000     -4.242190000      0.788970000
H       -3.949830000     -3.606970000      2.846450000
H       -3.454000000     -4.570580000     -1.325720000
C       -2.376640000      0.946540000      1.461980000
C       -1.568700000      0.918220000      2.614920000
C       -3.544790000      1.727510000      1.481870000
C       -1.927990000      1.638250000      3.758910000
H       -0.651210000      0.335680000      2.619410000
C       -3.898460000      2.458340000      2.623080000
H       -4.183570000      1.783150000      0.605800000
C       -3.093900000      2.413640000      3.766640000
H       -1.291800000      1.599060000      4.640870000
H       -4.803230000      3.062840000      2.614340000
H       -3.369290000      2.981590000      4.652870000
H       -4.210680000     -5.221070000      0.962270000
H       -5.024960000      2.085940000     -4.310750000
C        0.530540000     -4.390380000     -1.988230000
C        0.520520000     -3.003180000     -1.488870000
H        0.754800000     -4.436550000     -3.061650000
C        0.423890000     -1.847390000     -1.066070000
H        0.866250000     -0.769770000      1.271800000
H       -0.443060000     -4.874610000     -1.836340000
H        1.281240000     -5.007990000     -1.477850000
97                     
TS3-s1, CsRhC42PNH38O3F10                                          
C        3.467610000      2.269460000     -0.317200000
C        1.899450000      3.955800000      0.011430000
C        2.897550000      4.974020000     -0.109130000
C        4.232890000      4.552370000     -0.349670000
C        4.515550000      3.206960000     -0.452840000
H        3.683680000      1.210040000     -0.400120000
C        0.520500000      4.297960000      0.256210000
C        2.526220000      6.339010000      0.015240000
H        5.020700000      5.297210000     -0.449010000
H        5.525100000      2.848770000     -0.635470000
C        1.199060000      6.657790000      0.255270000
C        0.207160000      5.661490000      0.376370000
H        3.285600000      7.111840000     -0.075640000
H        0.906620000      7.701520000      0.356500000
H       -0.826240000      5.940280000      0.572380000
N        2.202020000      2.614690000     -0.093800000
O       -0.388620000      3.348450000      0.357870000
Rh       0.407170000      1.378680000      0.218370000
F       -0.707160000      1.467190000     -2.603740000
Cs      -2.942790000      3.581280000     -1.506630000
P        1.328710000     -0.737240000      0.135050000
C        2.300460000     -1.161730000      1.660650000
C        2.715520000     -0.119350000      2.503970000
C        2.627240000     -2.484530000      2.010670000
C        3.453580000     -0.383440000      3.661120000
H        2.450030000      0.907560000      2.268140000
C        3.360080000     -2.756790000      3.165990000
H        2.305390000     -3.316460000      1.389680000
C        3.773240000     -1.703350000      3.991440000
H        3.761310000      0.436820000      4.304050000
H        3.599120000     -3.785850000      3.422750000
C        0.224610000     -2.218690000     -0.015890000
C        0.138020000     -2.981810000     -1.188070000
C       -0.591030000     -2.561550000      1.078410000
C       -0.737550000     -4.070220000     -1.269680000
H        0.752800000     -2.747630000     -2.051530000
C       -1.457580000     -3.649700000      1.007230000
H       -0.550960000     -1.982180000      1.996050000
C       -1.534250000     -4.403300000     -0.172340000
H       -0.790910000     -4.649570000     -2.187380000
H       -2.077780000     -3.901130000      1.864170000
C        2.537080000     -0.999220000     -1.254560000
C        2.214250000     -0.454990000     -2.511310000
C        3.744340000     -1.702900000     -1.115810000
C        3.066730000     -0.621730000     -3.603820000
H        1.294430000      0.107060000     -2.645540000
C        4.607660000     -1.863470000     -2.202930000
H        4.035210000     -2.126600000     -0.160130000
C        4.265060000     -1.327670000     -3.448270000
H        2.794600000     -0.201180000     -4.568580000
H        5.538390000     -2.409870000     -2.074050000
C       -3.734790000     -0.431870000      0.576230000
C       -2.503630000      0.307380000      0.992550000
H       -4.601510000      0.211220000      0.781200000
C       -1.347570000      0.630990000      0.575970000
H       -0.372800000      1.349500000     -1.678090000
H       -3.861800000     -1.303160000      1.233240000
C       -7.373160000      1.239130000      4.077830000
H       -7.746080000      0.456230000      3.409870000
H       -7.231620000      0.810320000      5.075150000
C       -5.085160000      0.933720000      3.441580000
C       -3.902650000      1.602750000      3.015310000
C       -2.678650000      0.920180000      2.780270000
H       -2.584480000     -0.059480000      3.248900000
O       -6.158480000      1.814480000      3.580080000
O       -5.235580000     -0.273600000      3.718680000
H       -3.970390000      2.671330000      2.827630000
H       -1.776190000      1.513910000      2.876510000
C       -3.754200000     -0.888530000     -0.891440000
H       -2.898080000     -1.547320000     -1.078520000
H       -3.618940000     -0.016600000     -1.545080000
C       -5.054960000     -1.613860000     -1.265490000
H       -5.186430000     -2.485690000     -0.609080000
H       -5.910610000     -0.952010000     -1.068840000
C       -5.099050000     -2.073610000     -2.729980000
H       -4.245220000     -2.737230000     -2.927720000
H       -4.966670000     -1.202680000     -3.388060000
C       -6.398960000     -2.798160000     -3.108730000
H       -6.531660000     -3.669220000     -2.452860000
H       -7.252840000     -2.135530000     -2.912450000
C       -6.434590000     -3.253910000     -4.573630000
H       -6.339570000     -2.401280000     -5.256790000
H       -5.613380000     -3.946620000     -4.793520000
H       -7.373930000     -3.766360000     -4.810470000
C       -2.446710000     -5.598730000     -0.226640000
F       -2.735070000     -5.979130000     -1.495690000
F       -1.898570000     -6.688390000      0.387140000
F       -3.631820000     -5.370970000      0.398340000
C        5.213390000     -1.460800000     -4.611260000
F        6.082620000     -0.411150000     -4.680560000
F        5.972960000     -2.581740000     -4.533610000
F        4.566300000     -1.499790000     -5.802970000
C        4.600120000     -2.001180000      5.215260000
F        4.523810000     -1.019400000      6.146360000
F        4.223940000     -3.155960000      5.822010000
F        5.922730000     -2.143250000      4.910570000
H       -8.092120000      2.059860000      4.125920000
92                       
TS3-s2, CsRhC41PN2H35OF10                                           
C        3.325300000      2.078710000     -0.632670000
C        1.982020000      3.837670000      0.083750000
C        3.017980000      4.793200000     -0.163770000
C        4.248890000      4.302020000     -0.676010000
C        4.400920000      2.951700000     -0.908860000
H        3.438230000      1.016060000     -0.817000000
C        0.702610000      4.252340000      0.603470000
C        2.784660000      6.167460000      0.107240000
H        5.061130000      4.998050000     -0.878740000
H        5.328220000      2.541200000     -1.299340000
C        1.553750000      6.555810000      0.611840000
C        0.525700000      5.621680000      0.860130000
H        3.572780000      6.892540000     -0.080660000
H        1.368140000      7.606730000      0.826900000
H       -0.428540000      5.954050000      1.263900000
N        2.153700000      2.490430000     -0.154330000
O       -0.244700000      3.360710000      0.818810000
Rh       0.355320000      1.358090000      0.415940000
F       -1.243390000      1.751810000     -2.135690000
Cs      -3.054510000      3.961990000     -0.577350000
P        1.079080000     -0.800900000      0.033750000
C        2.287620000     -1.395820000      1.313970000
C        2.936930000     -0.446260000      2.118580000
C        2.571520000     -2.758790000      1.515490000
C        3.858760000     -0.840970000      3.091920000
H        2.715870000      0.610560000      1.996850000
C        3.487870000     -3.161160000      2.487460000
H        2.075840000     -3.520930000      0.919850000
C        4.135520000     -2.199240000      3.272530000
H        4.353120000     -0.090430000      3.703000000
H        3.697830000     -4.218850000      2.625500000
C       -0.143710000     -2.194180000      0.017710000
C       -0.511960000     -2.864460000     -1.156160000
C       -0.758700000     -2.560890000      1.229430000
C       -1.468990000     -3.885330000     -1.126990000
H       -0.057820000     -2.609630000     -2.108610000
C       -1.704380000     -3.582370000      1.267190000
H       -0.498100000     -2.052670000      2.153180000
C       -2.064090000     -4.243290000      0.083990000
H       -1.741710000     -4.393130000     -2.047970000
H       -2.166220000     -3.854280000      2.213400000
C        1.975880000     -1.042680000     -1.577840000
C        1.465140000     -0.388780000     -2.714090000
C        3.125200000     -1.837300000     -1.718270000
C        2.076500000     -0.536720000     -3.960270000
H        0.586440000      0.244820000     -2.633570000
C        3.748430000     -1.980420000     -2.960660000
H        3.557040000     -2.347470000     -0.863510000
C        3.219550000     -1.334650000     -4.082650000
H        1.660890000     -0.030380000     -4.827720000
H        4.638090000     -2.598850000     -3.047730000
C       -3.796550000     -0.198270000      1.393800000
C       -2.452720000      0.417620000      1.624020000
H       -4.564670000      0.493290000      1.764400000
C       -1.363370000      0.701420000      1.036200000
H       -0.758860000      1.536700000     -1.298660000
H       -3.883980000     -1.097640000      2.021560000
C       -3.227210000      1.803580000      3.925700000
C       -2.272760000      0.857190000      3.457220000
H       -2.383450000     -0.168230000      3.811560000
H       -3.001430000      2.866470000      3.874420000
H       -1.241150000      1.189250000      3.498320000
C       -4.096180000     -0.571490000     -0.067350000
H       -3.334210000     -1.274160000     -0.424210000
H       -4.005690000      0.325230000     -0.694130000
C       -5.492080000     -1.185850000     -0.245350000
H       -5.577320000     -2.083200000      0.383710000
H       -6.250410000     -0.480650000      0.123970000
C       -5.814460000     -1.557020000     -1.700130000
H       -5.057960000     -2.263400000     -2.070520000
H       -5.728930000     -0.660490000     -2.330950000
C       -7.210120000     -2.170780000     -1.883580000
H       -7.296300000     -3.067380000     -1.254960000
H       -7.966900000     -1.465330000     -1.514410000
C       -7.524180000     -2.538130000     -3.340060000
H       -7.481000000     -1.655780000     -3.989890000
H       -6.805640000     -3.269940000     -3.728290000
H       -8.525680000     -2.972680000     -3.435960000
C       -3.066240000     -5.364230000      0.145030000
F       -3.565810000     -5.687430000     -1.072650000
F       -2.523930000     -6.507580000      0.657000000
F       -4.126670000     -5.062200000      0.941090000
C        3.915070000     -1.452830000     -5.413810000
F        4.859030000     -0.481840000     -5.581750000
F        4.557460000     -2.638890000     -5.557590000
F        3.056550000     -1.335630000     -6.457400000
C        5.089190000     -2.639910000      4.352550000
F        6.002660000     -1.685980000      4.658590000
F        4.438440000     -2.938020000      5.514110000
F        5.779690000     -3.755820000      4.005640000
C       -4.529330000      1.464670000      4.323720000
N       -5.618300000      1.200980000      4.702640000
67
TS3-s3, CsRhC32PNH29OF                                           
C        0.907620000      3.262420000      0.040100000
C       -1.400020000      3.038240000      0.229670000
C       -1.579370000      4.455930000      0.314510000
C       -0.412800000      5.266700000      0.255220000
C        0.823140000      4.669850000      0.121840000
H        1.875450000      2.788850000     -0.077980000
C       -2.531970000      2.144480000      0.296190000
C       -2.886800000      4.992510000      0.454560000
H       -0.507980000      6.349470000      0.316770000
H        1.736450000      5.257220000      0.074090000
C       -3.968980000      4.127300000      0.511570000
C       -3.804400000      2.729220000      0.435810000
H       -3.020520000      6.069820000      0.517670000
H       -4.974500000      4.530610000      0.620950000
H       -4.672620000      2.075620000      0.492550000
N       -0.155270000      2.459510000      0.088830000
O       -2.349240000      0.843850000      0.233290000
Rh      -0.284510000      0.261400000      0.056520000
F       -0.738120000     -0.288140000     -2.950830000
Cs      -4.441720000     -1.369870000     -0.445950000
P        1.961120000     -0.291140000     -0.013660000
C        2.813160000     -0.055230000      1.619960000
C        2.212310000      0.775800000      2.580810000
C        4.040290000     -0.668590000      1.934220000
C        2.825360000      0.999990000      3.819100000
H        1.252870000      1.238880000      2.363860000
C        4.651630000     -0.449760000      3.172800000
H        4.522040000     -1.327350000      1.216130000
C        4.047090000      0.387590000      4.118790000
H        2.343180000      1.645470000      4.550370000
H        5.599400000     -0.934400000      3.398300000
C        2.487650000     -2.011350000     -0.463080000
C        3.116000000     -2.316990000     -1.679910000
C        2.213350000     -3.058740000      0.435370000
C        3.466940000     -3.637820000     -1.991780000
H        3.346410000     -1.531060000     -2.392840000
C        2.572070000     -4.373340000      0.130050000
H        1.724500000     -2.848680000      1.382190000
C        3.199080000     -4.669640000     -1.087760000
H        3.956530000     -3.853220000     -2.939420000
H        2.358880000     -5.167950000      0.842280000
C        2.964990000      0.744170000     -1.188360000
C        2.414460000      1.027410000     -2.453020000
C        4.238170000      1.253720000     -0.880900000
C        3.125540000      1.786380000     -3.388320000
H        1.424330000      0.659700000     -2.709080000
C        4.944760000      2.023450000     -1.813260000
H        4.685900000      1.066180000      0.090170000
C        4.393040000      2.289510000     -3.071060000
H        2.684350000      1.990590000     -4.361830000
H        5.925960000      2.414980000     -1.552560000
H        4.942680000      2.887720000     -3.794810000
H        3.476750000     -5.694280000     -1.326440000
H        4.522080000      0.555330000      5.083200000
C       -1.457070000     -3.998100000     -0.569730000
C       -1.190380000     -2.815410000      0.328280000
H       -2.446960000     -4.429880000     -0.365170000
C       -0.763260000     -1.622640000      0.069130000
H       -0.599740000     -0.245500000     -1.975360000
H       -0.718210000     -4.792810000     -0.392380000
H       -1.406390000     -3.722940000     -1.627400000
C       -2.688950000     -3.752900000      2.332720000
C       -1.381430000     -3.252020000      1.981640000
H       -0.587840000     -4.005460000      2.062300000
H       -3.466550000     -3.068580000      2.670730000
H       -1.092120000     -2.362560000      2.540500000
H       -3.026950000     -4.726100000      1.980300000
70                     
TS3-s4, CsRhC33PNH31OF                                            
C        0.706560000      3.339370000      0.270820000
C       -1.546780000      2.949990000      0.697380000
C       -1.801580000      4.344750000      0.893480000
C       -0.699850000      5.234560000      0.762310000
C        0.546960000      4.730490000      0.456650000
H        1.681150000      2.939530000      0.014550000
C       -2.607900000      1.979810000      0.831700000
C       -3.115910000      4.781790000      1.208340000
H       -0.852300000      6.302940000      0.905630000
H        1.412040000      5.379890000      0.349590000
C       -4.130930000      3.843650000      1.325060000
C       -3.891090000      2.466310000      1.143180000
H       -3.307280000      5.842040000      1.356110000
H       -5.140350000      4.171800000      1.568250000
H       -4.702720000      1.749650000      1.252870000
N       -0.293640000      2.464820000      0.381330000
O       -2.354320000      0.700430000      0.668510000
Rh      -0.291570000      0.265980000      0.245740000
F       -1.150040000      0.008970000     -2.645210000
Cs      -3.944070000     -1.028940000     -1.398790000
P        1.950540000     -0.155560000     -0.117390000
C        2.978060000      0.012960000      1.421220000
C        2.461840000      0.759210000      2.494270000
C        4.254290000     -0.564430000      1.556250000
C        3.203800000      0.935630000      3.668060000
H        1.468010000      1.193320000      2.415170000
C        4.994740000     -0.394150000      2.730480000
H        4.674700000     -1.156670000      0.747440000
C        4.472700000      0.358770000      3.789790000
H        2.785690000      1.515580000      4.488280000
H        5.978860000     -0.850250000      2.817210000
C        2.496570000     -1.810430000     -0.753620000
C        2.977250000     -1.998180000     -2.058630000
C        2.384840000     -2.930830000      0.090220000
C        3.343250000     -3.273700000     -2.510340000
H        3.080490000     -1.153780000     -2.733500000
C        2.760160000     -4.200160000     -0.355120000
H        2.009480000     -2.813610000      1.102160000
C        3.239360000     -4.378230000     -1.659880000
H        3.716870000     -3.396730000     -3.524950000
H        2.674210000     -5.052280000      0.316170000
C        2.770350000      1.010540000     -1.314060000
C        2.071780000      1.353680000     -2.487390000
C        4.045430000      1.564450000     -1.107510000
C        2.639370000      2.213650000     -3.433230000
H        1.076410000      0.954430000     -2.662850000
C        4.609020000      2.434900000     -2.048730000
H        4.606130000      1.332750000     -0.207250000
C        3.910220000      2.759810000     -3.216300000
H        2.083980000      2.462670000     -4.335240000
H        5.594360000      2.858630000     -1.865380000
H        4.348700000      3.436290000     -3.946980000
H        3.529680000     -5.367660000     -2.007350000
H        5.048340000      0.488810000      4.703890000
C       -1.419120000     -4.078120000     -0.147170000
C       -1.010530000     -2.843020000      0.615790000
H       -2.406980000     -4.437920000      0.164960000
C       -0.679880000     -1.650690000      0.245390000
H       -0.796180000      0.017340000     -1.707330000
H       -0.711890000     -4.900690000      0.028670000
H       -1.446830000     -3.890650000     -1.225480000
C       -2.028850000     -3.668930000      3.004030000
C       -0.834490000     -3.231810000      2.342680000
H       -0.058750000     -4.003390000      2.268170000
H       -2.683430000     -2.905100000      3.427820000
H       -0.418110000     -2.311700000      2.747190000
C       -2.593980000     -5.060970000      2.919780000
H       -1.847790000     -5.776940000      2.554880000
H       -2.931850000     -5.411940000      3.906360000
H       -3.471960000     -5.142400000      2.257280000
97                    
TS4-s1, CsRhC42PNH38O3F10                                          
C       -2.089300000     -2.990990000     -1.565300000
C        0.107770000     -3.605080000     -2.032200000
C       -0.319550000     -4.783490000     -2.722340000
C       -1.717060000     -5.022570000     -2.799890000
C       -2.597590000     -4.133280000     -2.220250000
H       -2.776180000     -2.283010000     -1.115040000
C        1.507910000     -3.296710000     -1.889950000
C        0.647400000     -5.654690000     -3.289360000
H       -2.080640000     -5.909630000     -3.315930000
H       -3.672420000     -4.287720000     -2.257970000
C        1.991070000     -5.345530000     -3.156330000
C        2.421900000     -4.190160000     -2.470000000
H        0.321670000     -6.548680000     -3.815390000
H        2.740900000     -6.006990000     -3.586580000
H        3.485370000     -3.980630000     -2.377640000
N       -0.789230000     -2.722140000     -1.470420000
O        1.886550000     -2.215840000     -1.231890000
Rh       0.267300000     -1.057340000     -0.484520000
F        0.750860000      0.657200000     -3.024770000
Cs       4.955390000     -1.174250000     -0.885830000
P       -1.538520000      0.181120000      0.311360000
C       -2.320090000     -0.558820000      1.819660000
C       -2.048810000     -1.900650000      2.128920000
C       -3.170590000      0.174370000      2.667090000
C       -2.622070000     -2.506340000      3.250370000
H       -1.376790000     -2.480060000      1.501260000
C       -3.743280000     -0.422790000      3.789970000
H       -3.389620000      1.219300000      2.462900000
C       -3.471350000     -1.766300000      4.077560000
H       -2.402410000     -3.547080000      3.472980000
H       -4.401760000      0.157050000      4.431890000
C       -1.261300000      1.934060000      0.839710000
C       -1.660960000      3.025170000      0.055710000
C       -0.577190000      2.178350000      2.044110000
C       -1.387790000      4.334950000      0.463050000
H       -2.196950000      2.875930000     -0.876180000
C       -0.308450000      3.481090000      2.459060000
H       -0.260840000      1.353130000      2.675640000
C       -0.714920000      4.562110000      1.665880000
H       -1.711880000      5.168070000     -0.154840000
H        0.211220000      3.650110000      3.398870000
C       -2.930690000      0.336870000     -0.906790000
C       -2.601810000      0.572200000     -2.254380000
C       -4.284790000      0.232790000     -0.549680000
C       -3.601300000      0.715480000     -3.218270000
H       -1.563130000      0.643900000     -2.564630000
C       -5.288590000      0.364850000     -1.512430000
H       -4.577810000      0.037570000      0.476650000
C       -4.945900000      0.612320000     -2.845440000
H       -3.327610000      0.905920000     -4.252810000
H       -6.331060000      0.279750000     -1.216590000
C        3.012790000      2.085020000      0.685170000
C        2.379500000      0.750330000      1.054540000
H        4.104980000      1.956050000      0.703610000
C        1.467770000      0.117360000      0.379860000
H        0.694910000      0.192770000     -2.171640000
H        2.789840000      2.782220000      1.505980000
C        6.444490000     -3.125300000      2.848750000
H        6.966050000     -2.876880000      1.917700000
H        6.943570000     -2.600180000      3.671840000
C        4.742300000     -1.444300000      2.555840000
C        3.380440000     -1.178750000      2.640020000
C        2.835730000      0.191410000      2.499660000
H        3.594590000      0.919740000      2.804770000
O        5.053700000     -2.808580000      2.786550000
O        5.693890000     -0.652030000      2.276880000
H        2.701270000     -2.009130000      2.814970000
H        1.963530000      0.339940000      3.146050000
C        2.581230000      2.712340000     -0.645720000
H        1.495140000      2.863440000     -0.640010000
H        2.788330000      2.016200000     -1.468170000
C        3.284670000      4.050170000     -0.918060000
H        3.068900000      4.748180000     -0.096910000
H        4.373410000      3.897100000     -0.911990000
C        2.873700000      4.694630000     -2.249830000
H        1.785190000      4.847610000     -2.258000000
H        3.089410000      3.997540000     -3.072050000
C        3.573310000      6.033240000     -2.526610000
H        3.357530000      6.730810000     -1.706020000
H        4.661220000      5.881260000     -2.519970000
C        3.156470000      6.670200000     -3.859050000
H        3.391190000      6.011830000     -4.704070000
H        2.078110000      6.867930000     -3.883860000
H        3.672820000      7.622300000     -4.026070000
C       -0.378730000      5.965870000      2.093820000
F       -1.215610000      6.888160000      1.557620000
F       -0.428110000      6.119940000      3.441970000
F        0.883020000      6.324830000      1.715390000
C       -6.026210000      0.711090000     -3.891570000
F       -6.330310000     -0.508230000     -4.422420000
F       -7.184000000      1.210440000     -3.391870000
F       -5.666410000      1.502950000     -4.931850000
C       -4.056280000     -2.392790000      5.317470000
F       -4.142460000     -3.742100000      5.225210000
F       -3.302680000     -2.127270000      6.422780000
F       -5.303860000     -1.930830000      5.586330000
H        6.497710000     -4.203720000      3.020390000
92                          
TS4-s2, CsRhC41PN2H35OF10                                             
C       -2.019480000     -2.918730000     -1.440220000
C        0.101640000     -3.877930000     -1.473510000
C       -0.396020000     -5.066360000     -2.096510000
C       -1.786750000     -5.122350000     -2.377150000
C       -2.595390000     -4.054830000     -2.047880000
H       -2.648370000     -2.073200000     -1.185550000
C        1.497720000     -3.743010000     -1.142580000
C        0.497610000     -6.125590000     -2.404110000
H       -2.202130000     -6.010810000     -2.849850000
H       -3.663560000     -4.065020000     -2.246540000
C        1.838970000     -5.985250000     -2.089270000
C        2.337290000     -4.819200000     -1.470060000
H        0.118560000     -7.027360000     -2.878570000
H        2.533650000     -6.790990000     -2.319620000
H        3.396360000     -4.747950000     -1.232520000
N       -0.722200000     -2.818740000     -1.159870000
O        1.939200000     -2.646530000     -0.552970000
Rh       0.421770000     -1.194880000     -0.200660000
F        1.517140000      0.043980000     -2.828870000
Cs       5.091980000     -2.190400000      0.166650000
P       -1.296120000      0.332100000      0.187490000
C       -2.394220000     -0.166030000      1.595630000
C       -2.345190000     -1.491680000      2.055380000
C       -3.267590000      0.738290000      2.226140000
C       -3.158710000     -1.913130000      3.110020000
H       -1.660690000     -2.202390000      1.600090000
C       -4.080410000      0.325030000      3.282250000
H       -3.318170000      1.775280000      1.904190000
C       -4.028240000     -1.003800000      3.719800000
H       -3.108940000     -2.944080000      3.450780000
H       -4.752800000      1.036130000      3.755120000
C       -0.887680000      2.082780000      0.630910000
C       -1.054050000      3.144690000     -0.267230000
C       -0.347850000      2.347320000      1.903730000
C       -0.692680000      4.448400000      0.092400000
H       -1.472400000      2.979250000     -1.254960000
C        0.006430000      3.642860000      2.269890000
H       -0.213750000      1.544090000      2.622680000
C       -0.164660000      4.696260000      1.359860000
H       -0.832830000      5.259610000     -0.616280000
H        0.413550000      3.829980000      3.261060000
C       -2.445780000      0.535110000     -1.255720000
C       -1.877900000      0.604560000     -2.541080000
C       -3.841580000      0.620550000     -1.127870000
C       -2.683330000      0.770040000     -3.669140000
H       -0.802470000      0.526690000     -2.673930000
C       -4.652910000      0.775280000     -2.254710000
H       -4.317750000      0.556770000     -0.154940000
C       -4.072340000      0.855720000     -3.524410000
H       -2.225370000      0.830170000     -4.653050000
H       -5.731530000      0.837440000     -2.135430000
C        3.323860000      1.800030000      0.969840000
C        2.526500000      0.574480000      1.396710000
H        4.391740000      1.566510000      1.095730000
C        1.650910000     -0.060490000      0.679230000
H        1.264800000     -0.279590000     -1.946960000
H        3.110110000      2.594510000      1.699950000
C        3.692390000     -2.045620000      3.482740000
C        2.620290000     -1.171020000      3.482260000
C        2.761830000      0.208600000      2.961620000
H        3.779650000      0.574000000      3.140900000
H        1.628420000     -1.608860000      3.575330000
H        2.083650000      0.906160000      3.471330000
N        4.633430000     -2.781670000      3.494390000
C        3.077070000      2.327580000     -0.448630000
H        2.017420000      2.585680000     -0.561080000
H        3.278270000      1.532770000     -1.177090000
C        3.940940000      3.554500000     -0.776500000
H        3.733810000      4.351250000     -0.048070000
H        5.002550000      3.296070000     -0.653820000
C        3.715090000      4.095960000     -2.195620000
H        2.653300000      4.351070000     -2.321720000
H        3.925770000      3.300870000     -2.924900000
C        4.572110000      5.325910000     -2.528410000
H        4.361470000      6.121420000     -1.800850000
H        5.633570000      5.071870000     -2.404150000
C        4.339390000      5.859840000     -3.948170000
H        3.293630000      6.155980000     -4.094030000
H        4.964610000      6.736180000     -4.153460000
H        4.575460000      5.098970000     -4.701780000
C       -4.868640000     -1.441810000      4.891930000
F       -5.212730000     -2.751620000      4.818500000
F       -4.209600000     -1.282480000      6.075420000
F       -6.019760000     -0.732270000      4.995700000
C        0.245050000      6.084960000      1.772260000
F       -0.092290000      7.025920000      0.859110000
F       -0.323950000      6.455970000      2.951890000
F        1.592580000      6.183330000      1.957120000
C       -4.950430000      0.975130000     -4.743440000
F       -5.322040000     -0.247360000     -5.221650000
F       -6.098480000      1.650610000     -4.487580000
F       -4.330600000      1.614390000     -5.765930000
67                     
TS4-s3, CsRhC32PNH29OF                                           
C       -0.589650000      3.139670000     -0.432560000
C       -2.521940000      2.130050000      0.371080000
C       -3.253570000      3.360470000      0.301630000
C       -2.553600000      4.507440000     -0.164600000
C       -1.228050000      4.399170000     -0.526170000
H        0.450150000      3.036520000     -0.727000000
C       -3.156280000      0.917630000      0.853990000
C       -4.618340000      3.395990000      0.693570000
H       -3.074020000      5.461770000     -0.229300000
H       -0.663990000      5.256610000     -0.884430000
C       -5.219520000      2.230230000      1.144430000
C       -4.511720000      1.013960000      1.227390000
H       -5.169560000      4.331780000      0.637490000
H       -6.265150000      2.248480000      1.448490000
H       -5.006910000      0.116950000      1.594350000
N       -1.202990000      2.042340000     -0.004620000
O       -2.483570000     -0.202910000      0.934950000
Rh      -0.393100000     -0.079270000      0.325200000
F       -0.921640000     -0.814750000     -1.793890000
Cs      -3.290880000     -2.415220000     -1.157860000
P        1.883210000      0.144220000     -0.165960000
C        2.883500000      0.952590000      1.166810000
C        2.213510000      1.769030000      2.094130000
C        4.279430000      0.815660000      1.275500000
C        2.918410000      2.439510000      3.099990000
H        1.132130000      1.873830000      2.035880000
C        4.984850000      1.479630000      2.284420000
H        4.823130000      0.185670000      0.576170000
C        4.306900000      2.295600000      3.198590000
H        2.381510000      3.066250000      3.809040000
H        6.064050000      1.359850000      2.354760000
C        2.873210000     -1.370150000     -0.568110000
C        3.201100000     -1.712840000     -1.889920000
C        3.253840000     -2.245440000      0.466630000
C        3.898150000     -2.895020000     -2.172020000
H        2.921720000     -1.058870000     -2.710470000
C        3.958740000     -3.418840000      0.186760000
H        3.005390000     -2.011560000      1.497070000
C        4.282450000     -3.750890000     -1.135230000
H        4.144220000     -3.139520000     -3.203440000
H        4.251290000     -4.076700000      1.002700000
C        2.175910000      1.217640000     -1.649730000
C        1.273220000      1.092150000     -2.723520000
C        3.243490000      2.125680000     -1.753790000
C        1.454420000      1.852740000     -3.884660000
H        0.427070000      0.407960000     -2.624890000
C        3.412450000      2.892150000     -2.913210000
H        3.944240000      2.250690000     -0.933510000
C        2.521120000      2.754550000     -3.983820000
H        0.753780000      1.747100000     -4.711100000
H        4.239720000      3.596220000     -2.977080000
H        2.653980000      3.350410000     -4.884680000
H        4.829420000     -4.665960000     -1.352880000
H        4.856460000      2.810690000      3.983740000
C        0.206420000     -3.981970000      2.419800000
C        0.155740000     -2.489760000      2.141670000
H       -0.521660000     -4.270200000      3.192220000
C       -0.066240000     -1.995820000      0.908850000
H       -0.190280000     -2.717760000      0.090200000
H        1.194680000     -4.287880000      2.794500000
H       -0.005720000     -4.568560000      1.519870000
C       -0.804450000     -0.865990000      3.865410000
C        0.401790000     -1.602170000      3.361980000
H        0.827640000     -2.201320000      4.180790000
H       -1.631450000     -0.649080000      3.195930000
H        1.189790000     -0.867450000      3.118190000
H       -0.789090000     -0.401760000      4.850790000
70                     
TS4-s4, CsRhC33PNH31OF                                            
C       -0.602630000      3.135070000     -0.457250000
C       -2.534570000      2.086490000      0.294330000
C       -3.284690000      3.305610000      0.220670000
C       -2.594140000      4.468230000     -0.220340000
C       -1.259510000      4.384840000     -0.553770000
H        0.444880000      3.052090000     -0.729750000
C       -3.159420000      0.859760000      0.753510000
C       -4.657810000      3.315900000      0.584230000
H       -3.128850000      5.414420000     -0.287850000
H       -0.701940000      5.254610000     -0.891980000
C       -5.249210000      2.136980000      1.013260000
C       -4.523580000      0.931620000      1.100630000
H       -5.222810000      4.243200000      0.524170000
H       -6.301000000      2.135940000      1.295980000
H       -5.011440000      0.023710000      1.450290000
N       -1.206790000      2.023770000     -0.053340000
O       -2.470910000     -0.250420000      0.839350000
Rh      -0.379570000     -0.093760000      0.231910000
F       -0.902730000     -0.740080000     -1.900470000
Cs      -3.243070000     -2.359810000     -1.382810000
P        1.891650000      0.169170000     -0.252550000
C        2.878360000      0.973940000      1.093760000
C        2.193520000      1.761710000      2.034940000
C        4.276550000      0.860710000      1.201490000
C        2.885750000      2.427940000      3.052400000
H        1.110400000      1.847100000      1.977550000
C        4.969540000      1.520130000      2.221990000
H        4.831990000      0.252180000      0.492430000
C        4.276650000      2.308130000      3.149380000
H        2.337280000      3.032640000      3.771680000
H        6.050730000      1.418730000      2.291020000
C        2.909740000     -1.320790000     -0.675020000
C        3.245030000     -1.637220000     -2.001390000
C        3.304910000     -2.204820000      0.346620000
C        3.964380000     -2.801800000     -2.300570000
H        2.953420000     -0.976060000     -2.811920000
C        4.032120000     -3.360340000      0.050080000
H        3.050990000     -1.991150000      1.380200000
C        4.363730000     -3.665980000     -1.276370000
H        4.216090000     -3.026070000     -3.335260000
H        4.335680000     -4.025230000      0.856270000
C        2.169530000      1.268900000     -1.720540000
C        1.258140000      1.159100000     -2.788940000
C        3.235790000      2.179410000     -1.817870000
C        1.431470000      1.938900000     -3.938860000
H        0.412910000      0.471840000     -2.694220000
C        3.396160000      2.964310000     -2.966060000
H        3.942630000      2.291790000     -1.000970000
C        2.496860000      2.842880000     -4.032070000
H        0.725050000      1.846260000     -4.762070000
H        4.222640000      3.669800000     -3.024900000
H        2.622800000      3.452830000     -4.924520000
H        4.928130000     -4.567160000     -1.507140000
H        4.816500000      2.819840000      3.943450000
C        0.258080000     -4.086200000      2.143210000
C        0.197250000     -2.581740000      1.941930000
H       -0.455440000     -4.417180000      2.912210000
C       -0.042040000     -2.030030000      0.736870000
H       -0.174050000     -2.712950000     -0.113490000
H        1.253870000     -4.406000000      2.485220000
H        0.033130000     -4.627810000      1.218430000
C       -0.731140000     -1.015500000      3.742970000
C        0.458510000     -1.755570000      3.200380000
H        0.868110000     -2.402860000      3.992490000
H       -1.540960000     -0.778100000      3.058120000
H        1.265670000     -1.027770000      2.995300000
C       -0.660260000     -0.342290000      5.079270000
H       -1.638270000      0.029120000      5.403980000
H       -0.279980000     -1.020560000      5.857070000
H        0.027290000      0.522360000      5.070620000
83
TS2i, RhC38PNH32OF9                                           
C        3.029070000      2.262740000      0.255100000
C        1.708130000      4.070540000     -0.388320000
C        2.800200000      4.982540000     -0.242600000
C        4.045220000      4.444420000      0.177880000
C        4.157620000      3.092790000      0.428640000
H        3.114670000      1.198240000      0.444360000
C        0.409780000      4.531550000     -0.798790000
C        2.600500000      6.360670000     -0.518880000
H        4.901380000      5.105860000      0.299340000
H        5.094470000      2.648890000      0.753820000
C        1.347350000      6.793100000     -0.922950000
C        0.263260000      5.900380000     -1.064360000
H        3.430220000      7.054880000     -0.411180000
H        1.186440000      7.847930000     -1.137770000
H       -0.711980000      6.265280000     -1.378610000
N        1.843730000      2.719420000     -0.142250000
O       -0.594790000      3.679020000     -0.898390000
Rh      -0.064300000      1.696680000     -0.489350000
P        0.574460000     -0.500790000     -0.015830000
C        0.825270000     -0.818370000      1.788270000
C        0.968760000      0.273740000      2.658260000
C        0.861650000     -2.120280000      2.319370000
C        1.163730000      0.075110000      4.027460000
H        0.917180000      1.291240000      2.279910000
C        1.055880000     -2.325130000      3.685380000
H        0.727860000     -2.985890000      1.675610000
C        1.207030000     -1.225120000      4.538420000
H        1.266560000      0.932490000      4.687250000
H        1.078920000     -3.337670000      4.080060000
C       -0.568800000     -1.866350000     -0.505350000
C       -0.295030000     -2.723020000     -1.579080000
C       -1.774700000     -2.020110000      0.202900000
C       -1.204940000     -3.722830000     -1.941540000
H        0.628360000     -2.633960000     -2.143150000
C       -2.677620000     -3.020760000     -0.146210000
H       -2.014580000     -1.361170000      1.032590000
C       -2.391440000     -3.873330000     -1.222220000
H       -0.975500000     -4.382090000     -2.773930000
H       -3.599680000     -3.135190000      0.418860000
C        2.170430000     -0.962270000     -0.831280000
C        2.419100000     -0.442790000     -2.113810000
C        3.126540000     -1.805770000     -0.242110000
C        3.590250000     -0.768300000     -2.800570000
H        1.699900000      0.225460000     -2.580780000
C        4.304030000     -2.126430000     -0.920790000
H        2.974140000     -2.215450000      0.751280000
C        4.531710000     -1.611580000     -2.201850000
H        3.762940000     -0.363530000     -3.794170000
H        5.034480000     -2.779780000     -0.450270000
C       -4.544590000      0.571080000     -1.295060000
C       -3.125320000      0.886910000     -1.076470000
H       -4.759050000      0.613200000     -2.372030000
C       -1.949220000      1.142720000     -0.827160000
H       -0.722060000      1.187470000     -1.829980000
H       -4.735210000     -0.466830000     -0.989290000
C       -5.515820000      1.512910000     -0.549780000
H       -5.320970000      2.545960000     -0.863130000
H       -5.301900000      1.467230000      0.525280000
C       -6.987930000      1.160300000     -0.802570000
H       -7.190870000      1.201100000     -1.882090000
H       -7.170600000      0.120710000     -0.495780000
C       -7.968770000      2.085030000     -0.067400000
H       -7.786150000      3.124900000     -0.373370000
H       -7.766130000      2.044680000      1.012260000
C       -9.443510000      1.737000000     -0.317360000
H       -9.647140000      1.778150000     -1.395940000
H       -9.626980000      0.698130000     -0.011390000
C      -10.417860000      2.664830000      0.420570000
H      -10.284040000      3.708080000      0.110370000
H      -11.459820000      2.389870000      0.221400000
H      -10.263600000      2.620110000      1.505350000
C        5.824150000     -1.928430000     -2.910520000
F        6.829960000     -1.092070000     -2.525240000
F        6.254990000     -3.188840000     -2.652020000
F        5.718940000     -1.810800000     -4.256210000
C       -3.396890000     -4.926170000     -1.607970000
F       -4.487540000     -4.385860000     -2.223660000
F       -2.889020000     -5.848580000     -2.459910000
F       -3.869920000     -5.601750000     -0.526850000
C        1.459520000     -1.449280000      6.008040000
F        1.035160000     -0.411650000      6.769640000
F        0.842310000     -2.564280000      6.471940000
F        2.788120000     -1.605910000      6.272770000
83                 
INT2i, RhC38PNH32OF9                                         
C        3.013220000      2.385320000      0.001440000
C        1.584940000      4.124850000     -0.590940000
C        2.641870000      5.084850000     -0.518510000
C        3.930350000      4.606880000     -0.160230000
C        4.113230000      3.265470000      0.102410000
H        3.152940000      1.328360000      0.199400000
C        0.247350000      4.524390000     -0.931840000
C        2.364880000      6.449000000     -0.798410000
H        4.762700000      5.305530000     -0.094810000
H        5.084170000      2.866390000      0.382530000
C        1.073050000      6.821350000     -1.133780000
C        0.022900000      5.880070000     -1.203550000
H        3.167310000      7.180670000     -0.745330000
H        0.853550000      7.865200000     -1.350060000
H       -0.983990000      6.197340000     -1.465000000
N        1.790180000      2.786760000     -0.333180000
O       -0.722770000      3.624560000     -0.966700000
Rh      -0.090060000      1.678780000     -0.584130000
P        0.586950000     -0.499440000     -0.042820000
C        0.746070000     -0.718200000      1.785220000
C        0.923710000      0.416560000      2.592130000
C        0.697860000     -1.985280000      2.393800000
C        1.059950000      0.293830000      3.977350000
H        0.952080000      1.410760000      2.153000000
C        0.832810000     -2.113860000      3.776010000
H        0.551370000     -2.881890000      1.797510000
C        1.011980000     -0.972210000      4.566840000
H        1.190380000      1.183820000      4.586980000
H        0.790590000     -3.100170000      4.231220000
C       -0.493580000     -1.911930000     -0.537870000
C       -0.133480000     -2.808600000     -1.551580000
C       -1.732850000     -2.072150000      0.109720000
C       -0.992020000     -3.851990000     -1.917500000
H        0.818190000     -2.719460000     -2.065640000
C       -2.583140000     -3.117000000     -0.240760000
H       -2.038790000     -1.385490000      0.892850000
C       -2.212490000     -4.006690000     -1.259560000
H       -0.696410000     -4.539990000     -2.704320000
H       -3.531840000     -3.235530000      0.277660000
C        2.242730000     -0.961990000     -0.726860000
C        2.544540000     -0.605750000     -2.053640000
C        3.201310000     -1.664200000      0.021170000
C        3.768590000     -0.954080000     -2.625110000
H        1.826870000     -0.051570000     -2.652700000
C        4.432980000     -2.006380000     -0.543200000
H        3.008560000     -1.946620000      1.051210000
C        4.712890000     -1.655940000     -1.867170000
H        3.979990000     -0.677450000     -3.654820000
H        5.163320000     -2.549060000      0.051110000
C       -4.545800000      0.407510000     -1.281630000
C       -3.130920000      0.763330000     -1.078530000
H       -4.761910000      0.383220000     -2.358870000
C       -1.950680000      1.040060000     -0.881570000
H        0.171660000      1.319580000     -2.043860000
H       -4.721000000     -0.614790000     -0.917510000
C       -5.538000000      1.369130000     -0.592300000
H       -5.361610000      2.387050000     -0.961950000
H       -5.325770000      1.388670000      0.484170000
C       -7.003830000      0.978730000     -0.825430000
H       -7.205640000      0.953950000     -1.905740000
H       -7.170470000     -0.044520000     -0.459810000
C       -8.001450000      1.927880000     -0.145900000
H       -7.834310000      2.951430000     -0.510380000
H       -7.800690000      1.952670000      0.934640000
C       -9.470250000      1.543840000     -0.377280000
H       -9.672120000      1.519630000     -1.456730000
H       -9.638920000      0.521660000     -0.012200000
C      -10.460140000      2.497870000      0.304500000
H      -10.341180000      3.523400000     -0.065210000
H      -11.497530000      2.196390000      0.120220000
H      -10.307600000      2.518250000      1.390270000
C        6.056430000     -1.985670000     -2.467210000
F        6.942380000     -0.960510000     -2.315070000
F        6.624490000     -3.074190000     -1.893600000
F        5.977700000     -2.230380000     -3.798700000
C       -3.161120000     -5.113570000     -1.638560000
F       -4.297140000     -4.632340000     -2.218290000
F       -2.619450000     -5.992780000     -2.514160000
F       -3.565560000     -5.831190000     -0.555320000
C        1.197560000     -1.122250000      6.056030000
F        0.863530000      0.001320000      6.735060000
F        0.452320000     -2.134550000      6.565950000
F        2.493580000     -1.399130000      6.376340000
82
COM1n, RhC37PNH30O3F9                                          
C        0.342210000     -2.917180000      0.223390000
C        2.561140000     -2.539300000     -0.375870000
C        2.903160000     -3.911850000     -0.161240000
C        1.866270000     -4.780570000      0.270400000
C        0.593520000     -4.285410000      0.463170000
H       -0.658610000     -2.526120000      0.368380000
C        3.549850000     -1.588420000     -0.808060000
C        4.237760000     -4.342100000     -0.382440000
H        2.086490000     -5.832290000      0.445700000
H       -0.222540000     -4.922140000      0.793540000
C        5.182830000     -3.418760000     -0.801610000
C        4.854290000     -2.062960000     -1.013440000
H        4.499180000     -5.384790000     -0.219880000
H        6.208500000     -3.740300000     -0.973300000
H        5.614980000     -1.358080000     -1.341320000
N        1.280110000     -2.064230000     -0.181310000
O        3.213170000     -0.327770000     -0.996460000
Rh       1.196950000      0.079580000     -0.606820000
P       -1.076380000      0.404170000     -0.197460000
C       -2.108260000     -0.827220000     -1.126100000
C       -1.631510000     -1.236880000     -2.383970000
C       -3.320240000     -1.358370000     -0.656040000
C       -2.354760000     -2.140910000     -3.164040000
H       -0.684110000     -0.854350000     -2.756820000
C       -4.042650000     -2.272010000     -1.426740000
H       -3.713820000     -1.080560000      0.316020000
C       -3.562580000     -2.656920000     -2.683360000
H       -1.974060000     -2.438750000     -4.137470000
H       -4.978290000     -2.674080000     -1.046550000
C       -1.584700000      0.255100000      1.576310000
C       -2.855520000      0.647200000      2.037320000
C       -0.654840000     -0.247100000      2.499380000
C       -3.193690000      0.518960000      3.383650000
H       -3.587920000      1.070440000      1.354450000
C       -0.987890000     -0.379100000      3.850730000
H        0.342260000     -0.526810000      2.170010000
C       -2.259360000     -0.001430000      4.288900000
H       -4.181620000      0.821600000      3.722250000
H       -0.255900000     -0.772150000      4.551000000
C       -1.842460000      2.021810000     -0.682270000
C       -1.702160000      3.137190000      0.163740000
C       -2.493260000      2.188050000     -1.915160000
C       -2.205750000      4.383870000     -0.208370000
H       -1.215190000      3.041780000      1.131490000
C       -2.998300000      3.434620000     -2.293420000
H       -2.626060000      1.349130000     -2.591650000
C       -2.857030000      4.531620000     -1.438390000
H       -2.096350000      5.230340000      0.464810000
H       -3.508230000      3.540070000     -3.247390000
C        5.325740000      2.810980000     -0.435290000
H        5.340880000      3.707580000      0.192400000
H        5.605170000      1.954260000      0.185690000
C        3.014180000      2.458970000      0.011680000
C        1.654670000      2.219360000     -0.554120000
C        1.392780000      1.827360000     -1.875900000
H        2.219380000      1.627740000     -2.552210000
O        3.971250000      2.605200000     -0.921710000
O        3.224120000      2.575380000      1.216660000
H        0.893120000      2.725830000      0.030180000
H        0.447450000      2.085020000     -2.345080000
C        6.239140000      2.953770000     -1.644000000
H        5.891630000      3.793210000     -2.259320000
H        6.159550000      2.050650000     -2.261690000
C        7.702810000      3.179290000     -1.235680000
H        7.773080000      4.078080000     -0.608920000
H        8.041300000      2.341650000     -0.611720000
C        8.639230000      3.325940000     -2.442160000
H        8.348580000      4.177480000     -3.068410000
H        9.674550000      3.485490000     -2.121890000
H        8.618990000      2.428380000     -3.071230000
C       -4.323800000     -3.674690000     -3.493750000
F       -3.972050000     -4.950480000     -3.163560000
F       -5.663990000     -3.585970000     -3.303330000
F       -4.100650000     -3.546900000     -4.824700000
C       -3.363270000      5.886610000     -1.859570000
F       -4.408300000      5.804130000     -2.719790000
F       -3.773390000      6.634550000     -0.804450000
F       -2.398810000      6.614080000     -2.493660000
C       -2.622470000     -0.096980000      5.748970000
F       -1.834360000     -0.966940000      6.424690000
F       -2.504240000      1.106170000      6.379580000
F       -3.906980000     -0.497850000      5.930870000
104                   
TS1n, RhC45PNH44O3F9                                          
C        1.360980000      0.718020000     -3.090210000
C       -0.349310000      2.303110000     -3.178430000
C        0.002760000      2.677270000     -4.513650000
C        1.108520000      2.011520000     -5.110100000
C        1.781800000      1.043250000     -4.398270000
H        1.877880000     -0.057660000     -2.541090000
C       -1.439070000      2.937430000     -2.490840000
C       -0.750310000      3.682360000     -5.172030000
H        1.411940000      2.273670000     -6.121960000
H        2.631430000      0.512660000     -4.819360000
C       -1.811170000      4.280960000     -4.505960000
C       -2.158960000      3.923530000     -3.188920000
H       -0.485840000      3.970900000     -6.186270000
H       -2.392240000      5.052270000     -5.008550000
H       -2.989760000      4.411940000     -2.684950000
N        0.336270000      1.319340000     -2.487430000
O       -1.720950000      2.586460000     -1.257220000
Rh      -0.476420000      1.013980000     -0.572030000
P        1.194500000     -0.464910000      0.293680000
C        1.705750000     -1.863300000     -0.820270000
C        0.700120000     -2.610600000     -1.460630000
C        3.047950000     -2.196060000     -1.068630000
C        1.022300000     -3.675400000     -2.302350000
H       -0.345530000     -2.360730000     -1.314530000
C        3.376880000     -3.255300000     -1.918440000
H        3.856910000     -1.631770000     -0.618470000
C        2.363950000     -4.000320000     -2.528720000
H        0.227180000     -4.244110000     -2.777690000
H        4.422220000     -3.495120000     -2.094880000
C        2.781800000      0.389260000      0.704640000
C        3.789310000     -0.215630000      1.480220000
C        2.990190000      1.686200000      0.214030000
C        4.976880000      0.461020000      1.753620000
H        3.654930000     -1.217040000      1.881330000
C        4.181720000      2.367660000      0.479470000
H        2.214490000      2.176710000     -0.368050000
C        5.173330000      1.752630000      1.247110000
H        5.745740000     -0.020780000      2.352610000
H        4.327490000      3.371040000      0.088830000
C        0.762120000     -1.340860000      1.873220000
C        1.039610000     -0.745900000      3.117130000
C        0.068230000     -2.563530000      1.856110000
C        0.643570000     -1.356370000      4.308870000
H        1.581420000      0.193520000      3.177910000
C       -0.329540000     -3.178000000      3.043970000
H       -0.164520000     -3.061830000      0.921490000
C       -0.039800000     -2.574930000      4.272950000
H        0.878160000     -0.881170000      5.257600000
H       -0.855260000     -4.128780000      3.005200000
C       -3.806260000     -1.086630000      0.330060000
C       -2.588390000     -0.436190000     -0.234440000
H       -3.537610000     -1.620990000      1.251800000
H       -4.518760000     -0.307770000      0.634930000
C       -1.860890000     -0.371710000     -1.283100000
C       -2.616210000      4.965980000      1.567640000
H       -2.284250000      5.321380000      2.548670000
H       -2.035880000      5.493430000      0.803440000
C       -1.058500000      3.159530000      1.628930000
C       -0.835900000      1.714520000      1.493060000
C       -1.938200000      0.761030000      1.322220000
H       -2.915610000      1.232580000      1.315490000
O       -2.347740000      3.547090000      1.462500000
O       -0.170560000      3.963580000      1.938860000
H       -0.002830000      1.404690000      2.112140000
H       -1.864710000     -0.116280000      1.958930000
H       -1.825470000     -0.726470000     -2.305710000
C       -4.492260000     -2.057900000     -0.648370000
H       -3.776600000     -2.834820000     -0.944870000
H       -4.761170000     -1.515190000     -1.563000000
C       -5.745480000     -2.711630000     -0.047680000
H       -5.471600000     -3.246290000      0.872680000
H       -6.456070000     -1.928700000      0.252090000
C       -6.440320000     -3.684630000     -1.011380000
H       -6.713390000     -3.150220000     -1.932300000
H       -5.729470000     -4.467360000     -1.312030000
C       -7.694910000     -4.343040000     -0.419050000
H       -7.422940000     -4.877540000      0.501180000
H       -8.406440000     -3.561710000     -0.119600000
C       -8.382710000     -5.314230000     -1.387810000
H       -9.272780000     -5.766130000     -0.935620000
H       -8.698840000     -4.802520000     -2.304710000
H       -7.708050000     -6.128150000     -1.679200000
C       -4.112120000      5.175800000      1.375920000
H       -4.655540000      4.599350000      2.135500000
H       -4.407470000      4.772700000      0.399130000
C       -4.505750000      6.657540000      1.468810000
H       -4.199130000      7.056840000      2.444680000
H       -3.951040000      7.230780000      0.714170000
C       -6.010660000      6.886260000      1.275900000
H       -6.593380000      6.354520000      2.037220000
H       -6.262020000      7.950190000      1.346580000
H       -6.343170000      6.529410000      0.294060000
C        2.717200000     -5.116510000     -3.477940000
F        1.780480000     -6.097030000     -3.490600000
F        2.827930000     -4.672560000     -4.762750000
F        3.901830000     -5.699570000     -3.169900000
C       -0.507830000     -3.223140000      5.549590000
F       -0.443470000     -4.577900000      5.491480000
F        0.219650000     -2.835480000      6.625370000
F       -1.806860000     -2.913860000      5.829120000
C        6.444250000      2.491160000      1.582830000
F        7.527590000      1.672890000      1.577760000
F        6.702920000      3.499810000      0.716680000
F        6.391150000      3.049000000      2.825700000
104                 
INT1n, RhC45PNH44O3F9                                           
C       -0.541210000      0.196560000     -3.449490000
C        1.299330000     -1.223670000     -3.493120000
C        1.449340000     -1.068680000     -4.907590000
C        0.520670000     -0.221730000     -5.569970000
C       -0.472680000      0.402960000     -4.846050000
H       -1.315570000      0.689420000     -2.871860000
C        2.183250000     -2.081240000     -2.746170000
C        2.494160000     -1.755180000     -5.580280000
H        0.601070000     -0.076240000     -6.645950000
H       -1.202230000      1.052730000     -5.321770000
C        3.346550000     -2.568100000     -4.849910000
C        3.202240000     -2.733470000     -3.455880000
H        2.610850000     -1.634840000     -6.654560000
H        4.150840000     -3.097250000     -5.357890000
H        3.880310000     -3.382330000     -2.906270000
N        0.308820000     -0.580470000     -2.787160000
O        2.010340000     -2.248430000     -1.449160000
Rh       0.506660000     -1.062160000     -0.608670000
P       -1.345490000      0.119830000      0.272400000
C       -1.713940000      1.758390000     -0.514070000
C       -0.657510000      2.667670000     -0.701620000
C       -3.002380000      2.125050000     -0.936540000
C       -0.883080000      3.917200000     -1.280160000
H        0.350420000      2.403200000     -0.399340000
C       -3.231950000      3.371330000     -1.525140000
H       -3.841670000      1.446810000     -0.825470000
C       -2.173250000      4.269060000     -1.691330000
H       -0.053800000      4.608190000     -1.407920000
H       -4.236250000      3.635890000     -1.845660000
C       -2.888190000     -0.864990000      0.003380000
C       -4.070160000     -0.637510000      0.732770000
C       -2.882400000     -1.867220000     -0.978670000
C       -5.214690000     -1.393440000      0.484410000
H       -4.108460000      0.131480000      1.499750000
C       -4.026680000     -2.628770000     -1.233110000
H       -1.986400000     -2.068090000     -1.561710000
C       -5.191590000     -2.388890000     -0.501360000
H       -6.120980000     -1.200470000      1.053420000
H       -4.002040000     -3.399890000     -1.998020000
C       -1.406860000      0.502140000      2.083880000
C       -1.739170000     -0.516500000      2.997000000
C       -1.057770000      1.766170000      2.582620000
C       -1.725750000     -0.275790000      4.370160000
H       -2.028140000     -1.504320000      2.647700000
C       -1.039700000      2.011850000      3.958170000
H       -0.804860000      2.580690000      1.912170000
C       -1.375130000      0.991370000      4.851590000
H       -1.995220000     -1.073850000      5.057580000
H       -0.774090000      3.000330000      4.322980000
C        3.519840000      1.293510000      1.497300000
C        2.429390000      0.342290000      1.041010000
H        3.180780000      1.783760000      2.423000000
H        4.390270000      0.690630000      1.797710000
C        1.840210000      0.362670000     -0.161710000
C        3.505580000     -4.534120000      1.048230000
H        3.066220000     -5.249030000      1.751700000
H        3.246200000     -4.852430000      0.033820000
C        1.584930000     -3.123330000      1.155070000
C        1.041130000     -1.747200000      1.347820000
C        1.954580000     -0.701550000      2.024770000
H        2.817480000     -1.183000000      2.500830000
O        2.927800000     -3.225640000      1.283560000
O        0.876150000     -4.105270000      0.916880000
H        0.117610000     -1.893600000      1.909110000
H        1.406740000     -0.206650000      2.838700000
H        2.099410000      1.028020000     -0.986370000
C        3.974330000      2.364480000      0.497730000
H        3.116530000      2.984680000      0.204810000
H        4.334160000      1.881680000     -0.420310000
C        5.081200000      3.269080000      1.060050000
H        4.723630000      3.750980000      1.981050000
H        5.940980000      2.650320000      1.353500000
C        5.549120000      4.348890000      0.073730000
H        5.907350000      3.868280000     -0.847820000
H        4.690280000      4.969140000     -0.220260000
C        6.656170000      5.253970000      0.633620000
H        6.299000000      5.735240000      1.554200000
H        7.515450000      4.635480000      0.926320000
C        7.118090000      6.330760000     -0.357410000
H        7.907210000      6.958000000      0.072580000
H        7.514240000      5.880910000     -1.275710000
H        6.288780000      6.989000000     -0.643020000
C        5.012500000     -4.421750000      1.233880000
H        5.223660000     -4.055760000      2.246780000
H        5.404350000     -3.670770000      0.536400000
C        5.725110000     -5.763640000      1.008110000
H        5.322470000     -6.512680000      1.702780000
H        5.501810000     -6.130320000     -0.002540000
C        7.245620000     -5.667180000      1.189660000
H        7.503780000     -5.336490000      2.202530000
H        7.726840000     -6.637080000      1.022850000
H        7.684390000     -4.951360000      0.484710000
C       -6.425470000     -3.224740000     -0.731090000
F       -7.559010000     -2.477380000     -0.706270000
F       -6.401040000     -3.872090000     -1.919970000
F       -6.574840000     -4.178790000      0.230700000
C       -2.409950000      5.595850000     -2.366530000
F       -1.567350000      6.559060000     -1.917950000
F       -2.222720000      5.517460000     -3.715210000
F       -3.673110000      6.051530000     -2.180140000
C       -1.322990000      1.231740000      6.337910000
F       -1.420940000      2.545470000      6.655740000
F       -2.319310000      0.586700000      6.997340000
F       -0.154130000      0.787320000      6.883030000
104                  
TS2n, RhC45PNH44O3F9                                           
C       -1.973460000      0.631130000      2.652520000
C       -1.683760000      2.874670000      2.100770000
C       -2.448410000      3.302390000      3.231780000
C       -2.978060000      2.292950000      4.080040000
C       -2.736150000      0.966900000      3.792590000
H       -1.784370000     -0.412250000      2.431240000
C       -1.090640000      3.828200000      1.202550000
C       -2.637380000      4.690280000      3.460100000
H       -3.565580000      2.577020000      4.951370000
H       -3.120090000      0.167770000      4.420940000
C       -2.068950000      5.603140000      2.583160000
C       -1.305730000      5.191230000      1.472040000
H       -3.220010000      5.017950000      4.317530000
H       -2.210130000      6.669120000      2.753560000
H       -0.864860000      5.927150000      0.803270000
N       -1.464640000      1.538540000      1.820660000
O       -0.373900000      3.405520000      0.187360000
Rh      -0.280830000      1.311930000      0.043800000
P       -0.151260000     -1.029740000      0.067340000
C        0.500530000     -1.639710000      1.699190000
C        1.407830000     -0.809850000      2.381190000
C        0.148920000     -2.870650000      2.277060000
C        1.964050000     -1.202910000      3.599900000
H        1.677760000      0.156890000      1.963240000
C        0.693110000     -3.265900000      3.501140000
H       -0.557750000     -3.534160000      1.789810000
C        1.606070000     -2.434120000      4.158670000
H        2.669750000     -0.549910000      4.106710000
H        0.407910000     -4.222130000      3.932400000
C       -1.712580000     -1.992650000     -0.195850000
C       -1.705120000     -3.364230000     -0.507920000
C       -2.944300000     -1.330920000     -0.088670000
C       -2.900220000     -4.061810000     -0.684900000
H       -0.767360000     -3.900860000     -0.626820000
C       -4.145310000     -2.023410000     -0.259150000
H       -2.971420000     -0.263740000      0.105910000
C       -4.121650000     -3.390270000     -0.551050000
H       -2.875560000     -5.122880000     -0.920060000
H       -5.090440000     -1.494690000     -0.168300000
C        0.993430000     -1.837640000     -1.147260000
C        0.598260000     -1.916690000     -2.496410000
C        2.262300000     -2.311410000     -0.783420000
C        1.448090000     -2.469440000     -3.452980000
H       -0.375580000     -1.543350000     -2.801400000
C        3.120440000     -2.861680000     -1.741330000
H        2.597930000     -2.268250000      0.248360000
C        2.713020000     -2.940060000     -3.075020000
H        1.126400000     -2.525240000     -4.490290000
H        4.099430000     -3.224820000     -1.440610000
C        3.343370000      3.265400000     -1.844540000
C        1.984780000      2.639770000     -1.780980000
H        3.674470000      3.280800000     -2.893960000
H        3.240560000      4.325620000     -1.565090000
C        1.536970000      1.537920000     -1.134990000
C       -3.473130000      2.525150000     -2.444250000
H       -3.716950000      2.010150000     -3.378970000
H       -3.871030000      1.929450000     -1.615900000
C       -1.359160000      1.425580000     -2.345550000
C        0.146750000      1.592670000     -2.320390000
C        0.780470000      2.968010000     -2.619730000
H        0.189730000      3.812080000     -2.259050000
O       -2.030350000      2.601710000     -2.310350000
O       -1.917740000      0.353390000     -2.595420000
H        0.527010000      0.825910000     -2.994710000
H        0.991380000      3.103490000     -3.688570000
H        2.157020000      0.754900000     -0.696590000
C        4.417850000      2.603630000     -0.970920000
H        4.535840000      1.554070000     -1.270930000
H        4.080370000      2.591020000      0.073770000
C        5.777550000      3.311850000     -1.060110000
H        6.109850000      3.328700000     -2.107670000
H        5.659250000      4.362510000     -0.759880000
C        6.864070000      2.657300000     -0.195130000
H        6.982660000      1.606310000     -0.495010000
H        6.532400000      2.639890000      0.852810000
C        8.225160000      3.363100000     -0.281890000
H        8.557320000      3.380960000     -1.328750000
H        8.108110000      4.412940000      0.019210000
C        9.306190000      2.702550000      0.584030000
H        9.472640000      1.660860000      0.284480000
H       10.263280000      3.229620000      0.499560000
H        9.020010000      2.700430000      1.642620000
C       -4.020590000      3.945350000     -2.426070000
H       -3.716820000      4.434640000     -1.492440000
H       -3.566330000      4.514800000     -3.246800000
C       -5.550820000      3.975580000     -2.557230000
H       -5.848210000      3.474810000     -3.488060000
H       -5.999180000      3.396240000     -1.739280000
C       -6.119540000      5.400510000     -2.542120000
H       -5.869370000      5.917250000     -1.608220000
H       -5.717570000      5.996620000     -3.369700000
H       -7.210870000      5.392010000     -2.636590000
C        3.605250000     -3.571390000     -4.110530000
F        3.240500000     -4.858590000     -4.380690000
F        3.563200000     -2.910040000     -5.296730000
F        4.904010000     -3.612910000     -3.725350000
C        2.159380000     -2.844220000      5.498880000
F        2.304740000     -4.188970000      5.606650000
F        3.371840000     -2.291260000      5.749050000
F        1.342800000     -2.463180000      6.523230000
C       -5.409730000     -4.135580000     -0.785130000
F       -5.340650000     -5.426510000     -0.370880000
F       -6.461280000     -3.568210000     -0.144120000
F       -5.740930000     -4.175850000     -2.108280000
104                 
INT2n, RhC45PNH44O3F9                                           
C        1.405040000     -2.755110000     -1.713100000
C        3.222540000     -1.336850000     -2.002760000
C        3.969280000     -2.349610000     -2.683790000
C        3.343780000     -3.612720000     -2.857000000
C        2.068240000     -3.812580000     -2.374020000
H        0.401660000     -2.915030000     -1.337300000
C        3.777140000     -0.028150000     -1.789340000
C        5.277900000     -2.058040000     -3.150610000
H        3.877460000     -4.410580000     -3.370750000
H        1.557410000     -4.764780000     -2.488690000
C        5.804220000     -0.792990000     -2.937210000
C        5.074410000      0.212800000     -2.269970000
H        5.846870000     -2.827380000     -3.666790000
H        6.807030000     -0.562140000     -3.292520000
H        5.508390000      1.198420000     -2.117930000
N        1.946770000     -1.554240000     -1.524180000
O        3.065700000      0.886550000     -1.168780000
Rh       1.180780000      0.248030000     -0.503050000
P       -0.812200000     -0.742550000      0.249660000
C       -1.765330000     -1.524360000     -1.144370000
C       -1.629250000     -0.937620000     -2.413730000
C       -2.609620000     -2.639050000     -1.004350000
C       -2.328920000     -1.436750000     -3.515220000
H       -0.957750000     -0.093920000     -2.549190000
C       -3.302950000     -3.150470000     -2.102390000
H       -2.731110000     -3.132680000     -0.046230000
C       -3.163150000     -2.546920000     -3.358090000
H       -2.208270000     -0.968810000     -4.488520000
H       -3.942720000     -4.020480000     -1.976390000
C       -0.507460000     -2.107560000      1.476330000
C       -1.545440000     -2.711180000      2.212050000
C        0.811810000     -2.522940000      1.712560000
C       -1.273690000     -3.720780000      3.134000000
H       -2.574760000     -2.383330000      2.093810000
C        1.092610000     -3.534230000      2.636340000
H        1.633090000     -2.045670000      1.186320000
C        0.048540000     -4.134080000      3.343770000
H       -2.089070000     -4.171880000      3.694390000
H        2.121960000     -3.836930000      2.807710000
C       -2.145150000      0.201980000      1.136930000
C       -1.953570000      0.564090000      2.483450000
C       -3.320570000      0.615330000      0.491400000
C       -2.910060000      1.314440000      3.166020000
H       -1.062660000      0.247270000      3.020630000
C       -4.283150000      1.368530000      1.169460000
H       -3.508620000      0.348600000     -0.544430000
C       -4.076160000      1.721000000      2.505700000
H       -2.741900000      1.581670000      4.206360000
H       -5.187270000      1.676150000      0.650860000
C       -0.703270000      2.719640000     -1.160480000
C        0.566040000      2.421790000     -0.405280000
H       -0.486620000      2.703870000     -2.237220000
H       -1.452580000      1.946750000     -0.979050000
C        0.879580000      1.925750000      0.882430000
C        5.818370000      2.571780000      1.320810000
H        5.888150000      2.521000000      2.412210000
H        5.982690000      1.566380000      0.921160000
C        3.456950000      2.229710000      1.393220000
C        2.119480000      2.814420000      1.004520000
C        1.827770000      3.301820000     -0.454780000
H        2.579550000      3.049660000     -1.200650000
O        4.476270000      2.998630000      0.957890000
O        3.614230000      1.237580000      2.091750000
H        1.932210000      3.631810000      1.716240000
H        1.594470000      4.370300000     -0.505580000
H        0.235680000      1.635850000      1.705490000
C       -1.322070000      4.089560000     -0.795140000
H       -0.592710000      4.888170000     -0.977070000
H       -1.543440000      4.106350000      0.279990000
C       -2.601630000      4.388770000     -1.589700000
H       -2.374610000      4.362400000     -2.664770000
H       -3.336020000      3.590970000     -1.411760000
C       -3.230910000      5.744400000     -1.237220000
H       -2.496430000      6.542670000     -1.415260000
H       -3.456120000      5.771430000     -0.161650000
C       -4.510820000      6.051380000     -2.028540000
H       -4.286630000      6.025640000     -3.103530000
H       -5.246100000      5.254950000     -1.850740000
C       -5.132790000      7.407710000     -1.670340000
H       -4.434580000      8.229360000     -1.870140000
H       -6.042710000      7.596040000     -2.251310000
H       -5.401090000      7.452810000     -0.608040000
C        6.802490000      3.576970000      0.740200000
H        6.668180000      3.622930000     -0.347810000
H        6.569820000      4.574960000      1.132510000
C        8.258470000      3.214840000      1.070280000
H        8.383530000      3.160900000      2.159780000
H        8.481760000      2.211320000      0.684760000
C        9.264990000      4.217930000      0.491710000
H        9.189720000      4.269880000     -0.600720000
H        9.090780000      5.226190000      0.885220000
H       10.293260000      3.935290000      0.742080000
C       -3.950630000     -3.080410000     -4.527070000
F       -4.035090000     -4.435390000     -4.513380000
F       -5.233690000     -2.617380000     -4.525950000
F       -3.414330000     -2.727010000     -5.719980000
C        0.325170000     -5.249700000      4.318360000
F        0.044490000     -6.471590000      3.780960000
F        1.620430000     -5.289160000      4.712270000
F       -0.430300000     -5.147020000      5.442640000
C       -5.127980000      2.491390000      3.259440000
F       -5.955750000      1.666410000      3.964290000
F       -4.588610000      3.349760000      4.162420000
F       -5.922740000      3.223000000      2.440340000
76                  
INT2b, CsRhC35PNH35OF                                          
C        3.683710000      0.868500000      1.075640000
C        2.295030000      2.727070000      1.221850000
C        3.363890000      3.550560000      1.699240000
C        4.638360000      2.939700000      1.855320000
C        4.793700000      1.605040000      1.548910000
H        3.803380000     -0.178130000      0.820290000
C        0.964740000      3.265490000      1.055740000
C        3.118960000      4.917250000      1.998810000
H        5.476950000      3.532210000      2.217360000
H        5.751790000      1.103650000      1.658840000
C        1.840910000      5.427790000      1.827180000
C        0.777380000      4.624940000      1.366100000
H        3.932850000      5.541260000      2.360300000
H        1.645420000      6.474160000      2.056670000
H       -0.218480000      5.048190000      1.250360000
N        2.472480000      1.394920000      0.908960000
O       -0.009710000      2.491450000      0.635450000
Rh       0.589950000      0.461130000      0.275290000
F        0.660360000      1.206960000     -2.624520000
Cs      -1.794450000      3.124990000     -1.880020000
P        1.270440000     -1.706860000     -0.094040000
C        1.462770000     -2.676710000      1.479690000
C        1.637090000     -1.971190000      2.682650000
C        1.454690000     -4.083250000      1.520990000
C        1.810730000     -2.650340000      3.894320000
H        1.624390000     -0.883970000      2.671980000
C        1.622740000     -4.763700000      2.731310000
H        1.310520000     -4.655940000      0.608370000
C        1.803780000     -4.049210000      3.922220000
H        1.942510000     -2.085680000      4.815050000
H        1.611750000     -5.851730000      2.743210000
C        0.226450000     -2.854730000     -1.113580000
C        0.602720000     -3.281060000     -2.396780000
C       -1.009940000     -3.285540000     -0.597500000
C       -0.232890000     -4.120210000     -3.146950000
H        1.552530000     -2.971720000     -2.822420000
C       -1.837120000     -4.132290000     -1.338850000
H       -1.330310000     -2.959170000      0.387090000
C       -1.453590000     -4.551540000     -2.619970000
H        0.079250000     -4.440410000     -4.139040000
H       -2.784750000     -4.461810000     -0.917350000
C        2.934760000     -1.877600000     -0.910550000
C        3.235710000     -1.018850000     -1.985180000
C        3.902060000     -2.816030000     -0.512070000
C        4.462840000     -1.107670000     -2.650560000
H        2.512070000     -0.272730000     -2.302410000
C        5.135600000     -2.896880000     -1.170280000
H        3.708460000     -3.484560000      0.321140000
C        5.419240000     -2.045990000     -2.243890000
H        4.673600000     -0.437470000     -3.481560000
H        5.873350000     -3.625550000     -0.840340000
H        6.377700000     -2.109340000     -2.754910000
H       -2.099640000     -5.208830000     -3.198440000
H        1.932230000     -4.579240000      4.863730000
C       -3.920050000     -0.566460000     -0.606120000
C       -2.504790000     -0.230370000     -0.357400000
H       -4.321160000      0.059430000     -1.417400000
C       -1.304760000     -0.027140000     -0.148100000
H        0.626360000      0.874290000     -1.669830000
H       -3.988770000     -1.602590000     -0.969600000
C       -4.835060000     -0.412630000      0.628610000
H       -4.773870000      0.621750000      0.991290000
H       -4.449570000     -1.046700000      1.437380000
C       -6.298370000     -0.774440000      0.339110000
H       -6.675360000     -0.139250000     -0.475430000
H       -6.350290000     -1.808230000     -0.031530000
C       -7.218240000     -0.628940000      1.560000000
H       -7.167600000      0.404540000      1.931580000
H       -6.842710000     -1.264090000      2.374950000
C       -8.683090000     -0.990340000      1.273380000
H       -9.060120000     -0.354920000      0.460470000
H       -8.734910000     -2.022990000      0.902420000
C       -9.594930000     -0.843440000      2.498920000
H       -9.593130000      0.187280000      2.873380000
H      -10.631270000     -1.108640000      2.260660000
H       -9.265410000     -1.493250000      3.318520000
97                    
TS3b, CsRhC42PNH47O3F                                           
C        4.721930000     -0.029920000     -0.414340000
C        3.849100000     -2.169440000     -0.682910000
C        5.153120000     -2.733520000     -0.853450000
C        6.260580000     -1.845290000     -0.788450000
C        6.044980000     -0.501390000     -0.569950000
H        4.544830000      1.024880000     -0.236420000
C        2.671270000     -3.001280000     -0.734960000
C        5.291180000     -4.129150000     -1.077350000
H        7.269200000     -2.236060000     -0.912480000
H        6.868160000      0.205960000     -0.514520000
C        4.153790000     -4.919810000     -1.128680000
C        2.863280000     -4.374550000     -0.962600000
H        6.282690000     -4.556110000     -1.207380000
H        4.250650000     -5.990070000     -1.303380000
H        1.987130000     -5.017840000     -1.014470000
N        3.653910000     -0.821780000     -0.466540000
O        1.478330000     -2.468190000     -0.572320000
Rh       1.506610000     -0.346220000     -0.316070000
F        1.089750000     -0.990830000      2.616550000
Cs      -0.469640000     -3.668780000      1.589290000
P        1.603240000      1.967670000     -0.149200000
C        2.031420000      2.767150000     -1.766730000
C        2.617880000      1.987370000     -2.778130000
C        1.792170000      4.130910000     -2.019870000
C        2.969490000      2.556800000     -4.007610000
H        2.789800000      0.927290000     -2.610320000
C        2.140790000      4.699920000     -3.248350000
H        1.323980000      4.754250000     -1.262200000
C        2.732920000      3.914750000     -4.245730000
H        3.419940000      1.936260000     -4.779440000
H        1.947720000      5.755770000     -3.426460000
C        0.101020000      2.926400000      0.355280000
C        0.008970000      3.599460000      1.583030000
C       -0.999580000      2.963070000     -0.520850000
C       -1.155620000      4.299070000      1.927170000
H        0.843660000      3.594420000      2.277660000
C       -2.155880000      3.668780000     -0.182100000
H       -0.954320000      2.444630000     -1.474500000
C       -2.239560000      4.338960000      1.045650000
H       -1.207240000      4.817450000      2.882460000
H       -2.993550000      3.692420000     -0.876070000
C        2.897920000      2.586360000      1.028130000
C        3.037570000      1.923980000      2.262590000
C        3.738990000      3.677700000      0.751180000
C        3.982650000      2.352190000      3.200280000
H        2.411440000      1.066570000      2.494450000
C        4.692890000      4.098750000      1.685650000
H        3.667530000      4.201430000     -0.197080000
C        4.815620000      3.440470000      2.914000000
H        4.072460000      1.829530000      4.150340000
H        5.339800000      4.941120000      1.449560000
H        5.557350000      3.768550000      3.639160000
H       -3.141480000      4.886960000      1.310250000
H        3.000800000      4.357710000     -5.202690000
C       -2.989650000     -0.218760000      0.276590000
C       -1.682970000     -0.469840000     -0.402820000
H       -3.601950000     -1.126280000      0.184670000
C       -0.430680000     -0.310180000     -0.262520000
H        1.178840000     -0.700220000      1.669690000
H       -3.534940000      0.557400000     -0.278020000
C       -6.204240000     -0.986480000     -2.592380000
H       -6.546860000     -1.635660000     -3.406540000
H       -6.675880000     -1.341370000     -1.668210000
C       -4.252600000     -2.338220000     -2.222630000
C       -2.834080000     -2.374150000     -2.099210000
C       -1.966830000     -1.250430000     -2.134530000
H       -2.356630000     -0.344630000     -2.595650000
O       -4.773130000     -1.076740000     -2.469600000
O       -5.017130000     -3.328550000     -2.168190000
H       -2.419020000     -3.361760000     -1.911480000
H       -0.940160000     -1.452570000     -2.419750000
C       -6.564160000      0.469230000     -2.865510000
H       -6.053260000      0.799280000     -3.779380000
H       -6.181720000      1.092740000     -2.047120000
C       -8.078250000      0.679440000     -3.013730000
H       -8.456710000      0.047670000     -3.828390000
H       -8.585390000      0.339140000     -2.100980000
C       -8.454080000      2.141580000     -3.288340000
H       -7.991060000      2.502710000     -4.214230000
H       -9.538480000      2.260970000     -3.389560000
H       -8.121240000      2.796080000     -2.474090000
C       -2.881260000      0.189970000      1.755350000
H       -2.296070000      1.113390000      1.833570000
H       -2.320980000     -0.579330000      2.303340000
C       -4.254140000      0.389670000      2.413510000
H       -4.808050000      1.167530000      1.868890000
H       -4.844690000     -0.532500000      2.313360000
C       -4.170570000      0.775190000      3.897620000
H       -3.578840000      1.695890000      4.000460000
H       -3.619280000     -0.003630000      4.444130000
C       -5.541190000      0.979930000      4.559150000
H       -6.092050000      1.759770000      4.015920000
H       -6.133480000      0.060470000      4.456530000
C       -5.447920000      1.362240000      6.042450000
H       -4.891360000      2.297570000      6.176760000
H       -6.441640000      1.500610000      6.483460000
H       -4.932880000      0.585540000      6.620520000
97                    
INT3b, CsRhC42PNH47O3F                                           
C       -4.624770000      0.860120000      0.129010000
C       -3.344930000      2.803310000      0.051750000
C       -4.501700000      3.629190000      0.216560000
C       -5.756010000      2.974650000      0.343170000
C       -5.816710000      1.597650000      0.301750000
H       -4.662540000     -0.223090000      0.097180000
C       -2.032380000      3.385640000     -0.074710000
C       -4.357560000      5.041530000      0.247690000
H       -6.659290000      3.568620000      0.472420000
H       -6.759300000      1.065460000      0.396790000
C       -3.093080000      5.592570000      0.115800000
C       -1.945620000      4.786740000     -0.043730000
H       -5.237420000      5.668140000      0.371510000
H       -2.973180000      6.674400000      0.133900000
H       -0.966050000      5.248240000     -0.150520000
N       -3.427880000      1.428220000      0.005980000
O       -0.973690000      2.610790000     -0.212610000
Rh      -1.433450000      0.529470000     -0.302730000
F       -0.415140000      0.884240000      2.591200000
Cs       1.706500000      3.217970000      1.399430000
P       -2.033080000     -1.721080000     -0.502000000
C       -2.918120000     -2.067120000     -2.090380000
C       -3.440270000     -0.997820000     -2.837670000
C       -3.077590000     -3.376960000     -2.580720000
C       -4.120160000     -1.231040000     -4.038730000
H       -3.306240000      0.023210000     -2.490480000
C       -3.756040000     -3.609850000     -3.780300000
H       -2.664010000     -4.220780000     -2.034040000
C       -4.281720000     -2.537270000     -4.511880000
H       -4.514840000     -0.390650000     -4.605730000
H       -3.870500000     -4.628600000     -4.144600000
C       -0.733340000     -3.035200000     -0.502880000
C       -0.631580000     -4.001170000      0.509510000
C        0.193180000     -3.058890000     -1.561810000
C        0.376210000     -4.973910000      0.464800000
H       -1.337140000     -4.011270000      1.334940000
C        1.192570000     -4.032740000     -1.608700000
H        0.132650000     -2.320460000     -2.356790000
C        1.289360000     -4.993590000     -0.593060000
H        0.439370000     -5.717240000      1.256770000
H        1.897560000     -4.040100000     -2.437360000
C       -3.192160000     -2.267450000      0.833460000
C       -2.921700000     -1.843810000      2.148400000
C       -4.316620000     -3.077600000      0.601850000
C       -3.747110000     -2.233380000      3.207320000
H       -2.066120000     -1.203530000      2.348200000
C       -5.149160000     -3.457820000      1.661370000
H       -4.560150000     -3.409050000     -0.403020000
C       -4.865610000     -3.040490000      2.966230000
H       -3.520300000     -1.899450000      4.217570000
H       -6.019750000     -4.079410000      1.463030000
H       -5.513960000     -3.336780000      3.788050000
H        2.069460000     -5.751110000     -0.629220000
H       -4.806050000     -2.719370000     -5.447590000
C        2.766020000     -0.618400000     -0.022580000
C        1.667360000      0.054450000     -0.820190000
H        3.580970000      0.108950000      0.085640000
C        0.395350000      0.118000000     -0.563570000
H       -0.709960000      0.690460000      1.678440000
H        3.178320000     -1.425190000     -0.645480000
C        6.411540000      1.039660000     -1.825450000
H        6.855450000      1.784850000     -2.496460000
H        6.626120000      1.361030000     -0.797260000
C        4.277380000      2.172590000     -1.872260000
C        2.890970000      2.031460000     -1.974660000
C        2.140950000      0.766250000     -2.178470000
H        2.748380000      0.003300000     -2.678360000
O        4.995580000      0.969310000     -2.031350000
O        4.928710000      3.242850000     -1.682850000
H        2.320030000      2.955110000     -1.903240000
H        1.249260000      0.924040000     -2.789660000
C        7.000050000     -0.342920000     -2.089520000
H        6.753600000     -0.645680000     -3.115890000
H        6.519610000     -1.071070000     -1.423040000
C        8.522100000     -0.383710000     -1.889890000
H        8.997200000      0.352120000     -2.552590000
H        8.764400000     -0.073260000     -0.864530000
C        9.124630000     -1.769720000     -2.155890000
H        8.931140000     -2.095070000     -3.184960000
H       10.210060000     -1.768030000     -2.005720000
H        8.696560000     -2.523530000     -1.484430000
C        2.368880000     -1.185170000      1.346800000
H        1.582120000     -1.937380000      1.215810000
H        1.933600000     -0.390750000      1.966420000
C        3.558990000     -1.814010000      2.086430000
H        3.988490000     -2.615190000      1.468360000
H        4.352330000     -1.062030000      2.206290000
C        3.191610000     -2.382280000      3.464810000
H        2.397520000     -3.133230000      3.347170000
H        2.764120000     -1.581560000      4.085330000
C        4.378260000     -3.014960000      4.206180000
H        4.805020000     -3.816590000      3.588160000
H        5.172480000     -2.265280000      4.324410000
C        4.002200000     -3.579180000      5.582850000
H        3.234630000     -4.357620000      5.496220000
H        4.869930000     -4.022520000      6.084430000
H        3.604500000     -2.794630000      6.237820000
97                    
TS4b, CsRhC42PNH47O3F                                           
C       -3.577030000     -2.644990000     -0.448310000
C       -1.662270000     -3.235990000     -1.634710000
C       -2.283360000     -4.422470000     -2.138440000
C       -3.617740000     -4.682850000     -1.728300000
C       -4.258520000     -3.803130000     -0.881210000
H       -4.079270000     -1.937690000      0.202040000
C       -0.298110000     -2.913620000     -1.971520000
C       -1.558860000     -5.280150000     -3.007760000
H       -4.122580000     -5.578570000     -2.086460000
H       -5.277370000     -3.974950000     -0.544990000
C       -0.257570000     -4.948800000     -3.348040000
C        0.368430000     -3.788550000     -2.844330000
H       -2.033100000     -6.179570000     -3.392730000
H        0.305320000     -5.596710000     -4.017640000
H        1.393440000     -3.560030000     -3.128610000
N       -2.328540000     -2.357810000     -0.807920000
O        0.275700000     -1.840780000     -1.460870000
Rh      -1.032410000     -0.654860000     -0.256630000
F       -1.296190000      0.964160000     -2.891770000
Cs       3.428870000     -1.500010000     -1.161880000
P       -2.542260000      0.644100000      0.975770000
C       -2.797030000      0.015230000      2.694270000
C       -2.397030000     -1.295980000      3.002540000
C       -3.387260000      0.799230000      3.703470000
C       -2.593480000     -1.818880000      4.285850000
H       -1.918180000     -1.909190000      2.242840000
C       -3.580040000      0.278120000      4.985900000
H       -3.690800000      1.822460000      3.496450000
C       -3.185910000     -1.033470000      5.280050000
H       -2.274960000     -2.835060000      4.507950000
H       -4.036350000      0.897570000      5.755100000
C       -2.170070000      2.436480000      1.240630000
C       -2.789790000      3.442880000      0.483430000
C       -1.200290000      2.803870000      2.190890000
C       -2.451360000      4.788380000      0.675170000
H       -3.546550000      3.192450000     -0.253700000
C       -0.868010000      4.146480000      2.385960000
H       -0.709450000      2.045200000      2.794070000
C       -1.491220000      5.145000000      1.626750000
H       -2.945670000      5.554880000      0.081990000
H       -0.121210000      4.411560000      3.131510000
C       -4.232520000      0.673960000      0.217200000
C       -4.332080000      0.795000000     -1.181960000
C       -5.413740000      0.586900000      0.973600000
C       -5.582800000      0.843370000     -1.805560000
H       -3.434950000      0.849030000     -1.792930000
C       -6.664680000      0.625230000      0.346680000
H       -5.371590000      0.476050000      2.052550000
C       -6.753630000      0.757000000     -1.043280000
H       -5.639830000      0.941150000     -2.887590000
H       -7.568140000      0.549750000      0.948080000
H       -7.726730000      0.786180000     -1.528860000
H       -1.232100000      6.190630000      1.778920000
H       -3.333830000     -1.436560000      6.279670000
C        1.924760000      2.460460000     -0.000380000
C        1.402420000      1.177800000      0.637000000
H        2.986750000      2.302210000     -0.240180000
C        0.359690000      0.512720000      0.222540000
H       -1.105740000      0.542450000     -2.036060000
H        1.910710000      3.233720000      0.781460000
C        6.003500000     -0.930380000      2.159060000
H        6.115730000     -0.917560000      3.252710000
H        6.171630000     -1.961440000      1.827530000
C        3.609100000     -1.304520000      2.300070000
C        2.379050000     -0.664300000      2.302210000
C        2.148160000      0.773500000      1.975940000
H        3.111190000      1.289070000      1.923470000
O        4.682530000     -0.502670000      1.802290000
O        3.877220000     -2.501920000      2.630950000
H        1.527630000     -1.279420000      2.587160000
H        1.566550000      1.279560000      2.761420000
C        7.008540000      0.016920000      1.510600000
H        6.805980000      1.042580000      1.846360000
H        6.858030000      0.006960000      0.422430000
C        8.463270000     -0.354610000      1.832910000
H        8.608030000     -0.350020000      2.921620000
H        8.659080000     -1.383550000      1.502340000
C        9.482160000      0.590260000      1.181930000
H        9.336310000      1.623440000      1.518880000
H       10.509380000      0.300900000      1.430370000
H        9.388770000      0.581930000      0.089370000
C        1.187020000      2.976280000     -1.241160000
H        0.138390000      3.170090000     -0.986590000
H        1.178270000      2.199350000     -2.015620000
C        1.824460000      4.254100000     -1.806800000
H        1.831280000      5.031520000     -1.029620000
H        2.878290000      4.057230000     -2.051360000
C        1.111240000      4.794630000     -3.054680000
H        0.057900000      4.994830000     -2.812600000
H        1.102410000      4.017900000     -3.832520000
C        1.750340000      6.070190000     -3.622430000
H        1.757610000      6.847660000     -2.846450000
H        2.803190000      5.870650000     -3.864170000
C        1.034060000      6.603420000     -4.870470000
H       -0.013040000      6.846410000     -4.653400000
H        1.514450000      7.512480000     -5.249810000
H        1.040370000      5.861990000     -5.678470000
97                   
INT4b, CsRhC42PNH47O3F                                          
C       -0.922250000     -3.082740000     -2.092530000
C        1.332620000     -2.530160000     -2.044460000
C        1.648500000     -3.520800000     -3.029060000
C        0.573870000     -4.303740000     -3.533750000
C       -0.704020000     -4.084680000     -3.066530000
H       -1.926160000     -2.899390000     -1.725590000
C        2.368910000     -1.691460000     -1.479480000
C        2.992540000     -3.685990000     -3.458710000
H        0.772740000     -5.067720000     -4.283640000
H       -1.549550000     -4.663680000     -3.429290000
C        3.979470000     -2.880490000     -2.910400000
C        3.683560000     -1.901460000     -1.940100000
H        3.228410000     -4.439810000     -4.206230000
H        5.012820000     -3.003240000     -3.231800000
H        4.479720000     -1.288290000     -1.522300000
N        0.049270000     -2.325800000     -1.589370000
O        2.069400000     -0.782690000     -0.584620000
Rh      -0.015100000     -0.738700000     -0.013430000
F       -0.067330000      1.124810000     -2.319760000
Cs       2.787830000      2.138580000     -1.371250000
P       -2.226910000     -0.848280000      0.606380000
C       -2.570750000     -2.379170000      1.617180000
C       -1.676320000     -3.460420000      1.530510000
C       -3.689570000     -2.504370000      2.461870000
C       -1.897340000     -4.637260000      2.255720000
H       -0.794930000     -3.374040000      0.900570000
C       -3.910890000     -3.677810000      3.190580000
H       -4.392980000     -1.681810000      2.561050000
C       -3.016060000     -4.750210000      3.088440000
H       -1.190390000     -5.460620000      2.175210000
H       -4.781980000     -3.752950000      3.838520000
C       -3.059940000      0.434210000      1.665210000
C       -4.162190000      1.187410000      1.231990000
C       -2.559890000      0.664840000      2.960120000
C       -4.751390000      2.145210000      2.069020000
H       -4.576630000      1.032150000      0.240510000
C       -3.150570000      1.612230000      3.799130000
H       -1.714350000      0.089810000      3.325590000
C       -4.249420000      2.360590000      3.355540000
H       -5.606620000      2.715950000      1.712400000
H       -2.751830000      1.767660000      4.799700000
C       -3.435600000     -1.000440000     -0.803490000
C       -3.238770000     -0.175930000     -1.927000000
C       -4.528600000     -1.884130000     -0.805490000
C       -4.118820000     -0.222470000     -3.013410000
H       -2.386210000      0.496440000     -1.960780000
C       -5.402950000     -1.940720000     -1.898160000
H       -4.703200000     -2.542920000      0.039760000
C       -5.204000000     -1.107370000     -3.004310000
H       -3.950050000      0.426120000     -3.870850000
H       -6.238340000     -2.637960000     -1.882230000
H       -5.883620000     -1.151440000     -3.852900000
H       -4.709090000      3.100190000      4.008030000
H       -3.186750000     -5.661800000      3.657510000
C       -0.095280000      3.254080000      1.360480000
C        0.436240000      1.924520000      1.823840000
H        0.757860000      3.937130000      1.201570000
C        0.432570000      0.615600000      1.431520000
H       -0.155600000      0.517510000     -1.500440000
H       -0.644060000      3.698210000      2.206780000
C        4.807280000     -0.449710000      2.201130000
H        5.005020000     -1.068950000      3.081730000
H        4.732710000     -1.109310000      1.330720000
C        2.466400000     -0.560040000      2.648650000
C        1.169080000      0.187770000      2.765870000
C        1.169100000      1.700930000      3.135980000
H        2.162130000      2.157340000      3.231320000
O        3.534440000      0.225330000      2.376330000
O        2.568880000     -1.777380000      2.786340000
H        0.528140000     -0.422710000      3.412310000
H        0.592420000      1.927290000      4.046340000
C        5.882090000      0.612110000      2.014310000
H        5.886280000      1.275800000      2.888380000
H        5.628610000      1.232680000      1.145190000
C        7.276370000     -0.003370000      1.823230000
H        7.521460000     -0.628250000      2.692150000
H        7.263310000     -0.675490000      0.955020000
C        8.371930000      1.053610000      1.632030000
H        8.434690000      1.720910000      2.499590000
H        9.353840000      0.586630000      1.498850000
H        8.175110000      1.673670000      0.749430000
C       -1.002360000      3.288290000      0.123930000
H       -1.877920000      2.656880000      0.306150000
H       -0.491160000      2.849640000     -0.739050000
C       -1.462040000      4.713110000     -0.222940000
H       -1.980160000      5.149400000      0.643540000
H       -0.581320000      5.348340000     -0.400180000
C       -2.385650000      4.784710000     -1.447430000
H       -3.267960000      4.152540000     -1.272830000
H       -1.870140000      4.352930000     -2.317230000
C       -2.846580000      6.208930000     -1.789990000
H       -3.362620000      6.640700000     -0.921540000
H       -1.966070000      6.841810000     -1.966740000
C       -3.771150000      6.271110000     -3.013310000
H       -4.678890000      5.676530000     -2.854710000
H       -4.081390000      7.299830000     -3.229590000
H       -3.272100000      5.879340000     -3.907870000
76                     
INT2c, CsRhC35PNH30OF6                                           
C        4.104270000      0.344050000      0.962450000
C        3.213950000      2.492140000      0.976460000
C        4.478490000      3.067580000      1.319410000
C        5.577400000      2.179800000      1.478910000
C        5.388760000      0.826000000      1.302470000
H        3.953550000     -0.719740000      0.814740000
C        2.046260000      3.323020000      0.802690000
C        4.588180000      4.473720000      1.486600000
H        6.556180000      2.578870000      1.739780000
H        6.204880000      0.117480000      1.417360000
C        3.461650000      5.263960000      1.315840000
C        2.209520000      4.708110000      0.980710000
H        5.549790000      4.909400000      1.747170000
H        3.537650000      6.342500000      1.444520000
H        1.339790000      5.350740000      0.859200000
N        3.044960000      1.134080000      0.800820000
O        0.890330000      2.777330000      0.492690000
Rh       0.960260000      0.646620000      0.334120000
F        0.974050000      1.153400000     -2.639150000
Cs      -0.843740000      3.704680000     -1.978150000
P        1.071270000     -1.632480000      0.211030000
C        1.271020000     -2.499540000      1.842340000
C        1.793170000     -1.759620000      2.915790000
C        0.945070000     -3.852080000      2.051360000
C        2.003560000     -2.359480000      4.163040000
C        1.148270000     -4.450180000      3.298170000
C        1.683320000     -3.706860000      4.357740000
C       -0.447750000     -2.500030000     -0.465030000
C       -0.589460000     -2.940880000     -1.785670000
C       -1.600840000     -2.602240000      0.327400000
C       -1.776350000     -3.481880000     -2.280570000
C       -2.796590000     -3.139710000     -0.138450000
C       -2.888270000     -3.584960000     -1.453520000
C        2.471230000     -2.343530000     -0.793420000
C        3.030910000     -1.542250000     -1.804210000
C        3.010060000     -3.623010000     -0.574530000
C        4.093270000     -2.010940000     -2.582780000
H        2.633850000     -0.548690000     -1.987730000
C        4.073800000     -4.092590000     -1.353020000
H        2.616610000     -4.264230000      0.206860000
C        4.618570000     -3.289000000     -2.360780000
H        4.511530000     -1.375060000     -3.360360000
H        4.477680000     -5.085500000     -1.166510000
H        5.447990000     -3.653700000     -2.963180000
C       -3.687030000      0.719290000     -0.438920000
C       -2.225930000      0.679190000     -0.230030000
H       -3.934960000      1.441780000     -1.230740000
C       -1.009620000      0.610010000     -0.030460000
H        0.923800000      0.894600000     -1.673000000
H       -4.035980000     -0.255050000     -0.811290000
C       -4.494440000      1.082170000      0.826820000
H       -4.157160000      2.059460000      1.195540000
H       -4.262410000      0.356310000      1.616460000
C       -6.009030000      1.115100000      0.580360000
H       -6.231470000      1.837180000     -0.218470000
H       -6.337520000      0.134990000      0.205950000
C       -6.824570000      1.477640000      1.829900000
H       -6.497510000      2.457970000      2.204930000
H       -6.603490000      0.756410000      2.629550000
C       -8.340470000      1.511290000      1.586100000
H       -8.562540000      2.232140000      0.787490000
H       -8.668610000      0.531700000      1.212800000
C       -9.148190000      1.875080000      2.839170000
H       -8.868750000      2.865760000      3.217400000
H      -10.224100000      1.890060000      2.631170000
H       -8.975470000      1.152630000      3.645880000
H        2.407880000     -1.769040000      4.982570000
H        1.840000000     -4.172980000      5.328190000
H        0.885850000     -5.496300000      3.441520000
H        0.515250000     -4.447810000      1.249000000
H        2.021280000     -0.705390000      2.783130000
F       -1.594780000     -2.180260000      1.604870000
F       -3.870370000     -3.215740000      0.669350000
F       -4.037080000     -4.098710000     -1.918650000
F       -1.851700000     -3.897870000     -3.558610000
F        0.423330000     -2.845050000     -2.670480000
97                    
TS3c, CsRhC42PNH42O3F6                                           
C        4.868960000      0.484960000     -0.311240000
C        4.372990000     -1.752400000     -0.714880000
C        5.756770000     -2.082080000     -0.868310000
C        6.697940000     -1.028220000     -0.718200000
C        6.255680000      0.247270000     -0.438410000
H        4.514620000      1.485950000     -0.090040000
C        3.353460000     -2.764240000     -0.839930000
C        6.131360000     -3.420920000     -1.158060000
H        7.760610000     -1.239330000     -0.825430000
H        6.947430000      1.076310000     -0.315730000
C        5.143720000     -4.384470000     -1.287250000
C        3.776570000     -4.070750000     -1.133150000
H        7.183070000     -3.670060000     -1.276510000
H        5.421670000     -5.412310000     -1.514060000
H        3.022320000     -4.847130000     -1.244710000
N        3.949870000     -0.468390000     -0.444360000
O        2.083590000     -2.447480000     -0.678290000
Rh       1.753720000     -0.369050000     -0.356910000
F        1.363520000     -1.338560000      2.512130000
Cs       0.364680000     -4.208830000      1.335370000
P        1.474660000      1.912780000     -0.131500000
C       -0.266280000      2.527630000      0.179910000
C       -0.762000000      2.996380000      1.402100000
C       -1.206580000      2.439460000     -0.858310000
C       -2.092760000      3.378120000      1.578750000
C       -2.538120000      2.813620000     -0.710210000
C       -2.987340000      3.288470000      0.518940000
C        2.502620000      2.695740000      1.201060000
C        2.806210000      1.921260000      2.335540000
C        3.021540000      3.998520000      1.113180000
C        3.595280000      2.442550000      3.364030000
H        2.425440000      0.907820000      2.420220000
C        3.815330000      4.518370000      2.141910000
H        2.825560000      4.616510000      0.243430000
C        4.102530000      3.744070000      3.271030000
H        3.817560000      1.829340000      4.234770000
H        4.211340000      5.527930000      2.055280000
C        1.901270000      2.887150000     -1.648750000
C        2.700190000      2.279060000     -2.630530000
C        1.460080000      4.207190000     -1.855180000
C        3.066440000      2.979770000     -3.785410000
H        3.025150000      1.249930000     -2.504620000
C        1.821710000      4.904780000     -3.010920000
H        0.821620000      4.698020000     -1.123730000
C        2.629840000      4.294320000     -3.978170000
H        3.684000000      2.492290000     -4.536730000
H        1.469570000      5.923870000     -3.155720000
H        2.908930000      4.837540000     -4.878450000
H        4.722070000      4.148920000      4.068470000
C       -2.683930000     -1.051120000      0.238840000
C       -1.384100000     -0.976060000     -0.499180000
H       -3.097970000     -2.058080000      0.091430000
C       -0.164690000     -0.657000000     -0.331130000
H        1.416690000     -0.956890000      1.603160000
H       -3.404900000     -0.375330000     -0.240740000
C       -5.864270000     -1.707990000     -2.671560000
H       -6.144020000     -2.251110000     -3.581730000
H       -6.260500000     -2.270860000     -1.817860000
C       -3.743730000     -2.834260000     -2.555910000
C       -2.329860000     -2.699730000     -2.456310000
C       -1.619320000     -1.475680000     -2.306430000
H       -2.140010000     -0.569970000     -2.612700000
O       -4.430820000     -1.629350000     -2.574850000
O       -4.371740000     -3.912140000     -2.666810000
H       -1.781870000     -3.639080000     -2.446670000
H       -0.589240000     -1.487320000     -2.646810000
C       -6.414500000     -0.286580000     -2.692080000
H       -5.977650000      0.254340000     -3.541490000
H       -6.089790000      0.237050000     -1.783730000
C       -7.946840000     -0.254490000     -2.789680000
H       -8.266380000     -0.787190000     -3.695340000
H       -8.378430000     -0.804100000     -1.942450000
C       -8.514230000      1.170990000     -2.812120000
H       -8.129650000      1.737250000     -3.668580000
H       -9.607600000      1.162520000     -2.882130000
H       -8.242610000      1.720100000     -1.902830000
C       -2.598440000     -0.736220000      1.741090000
H       -2.197170000      0.274930000      1.880980000
H       -1.877340000     -1.414840000      2.214740000
C       -3.956270000     -0.851140000      2.448760000
H       -4.676230000     -0.173710000      1.967900000
H       -4.353690000     -1.866750000      2.310370000
C       -3.889970000     -0.534700000      3.949970000
H       -3.493840000      0.481410000      4.089370000
H       -3.169530000     -1.211140000      4.431940000
C       -5.244670000     -0.649800000      4.663840000
H       -5.964880000      0.026820000      4.184210000
H       -5.641140000     -1.664950000      4.526220000
C       -5.168300000     -0.332100000      6.163220000
H       -4.808190000      0.689460000      6.334310000
H       -6.149970000     -0.423020000      6.641830000
H       -4.482420000     -1.014960000      6.678880000
F        0.023750000      3.091370000      2.491310000
F       -2.515470000      3.824790000      2.774450000
F       -4.268340000      3.647380000      0.679720000
F       -3.393690000      2.712700000     -1.741750000
F       -0.839790000      1.988210000     -2.070980000
97                     
INT3c, CsRhC42PNH42O3F6                                            
C       -4.758080000      0.893410000      0.213840000
C       -3.596560000      2.891320000     -0.072880000
C       -4.793280000      3.662770000      0.065310000
C       -6.002050000      2.953150000      0.294720000
C       -5.983570000      1.576320000      0.373230000
H       -4.734980000     -0.189550000      0.273300000
C       -2.324270000      3.531860000     -0.286750000
C       -4.729520000      5.078360000     -0.026790000
H       -6.933630000      3.505010000      0.408610000
H       -6.889410000      1.003230000      0.551160000
C       -3.503630000      5.684440000     -0.248250000
C       -2.316400000      4.931880000     -0.377240000
H       -5.639570000      5.664320000      0.075880000
H       -3.445450000      6.768680000     -0.325270000
H       -1.368870000      5.436430000     -0.554640000
N       -3.601630000      1.514620000     -0.005710000
O       -1.224770000      2.806630000     -0.388920000
Rh      -1.571850000      0.714150000     -0.303400000
F       -0.578910000      1.562050000      2.526760000
Cs       1.453430000      3.832450000      1.034590000
P       -2.055520000     -1.560010000     -0.337890000
C       -3.033190000     -2.106440000     -1.809080000
C       -3.686590000     -1.137420000     -2.587630000
C       -3.135240000     -3.460110000     -2.179800000
C       -4.443680000     -1.514120000     -3.702570000
C       -3.888690000     -3.834590000     -3.295590000
C       -4.548390000     -2.862620000     -4.058030000
C       -0.605600000     -2.733070000     -0.458200000
C       -0.145890000     -3.594710000      0.544410000
C        0.153640000     -2.717240000     -1.638640000
C        0.983690000     -4.399040000      0.382940000
C        1.282210000     -3.507490000     -1.826100000
C        1.702390000     -4.357490000     -0.806030000
C       -3.036740000     -2.122130000      1.125650000
C       -2.784200000     -1.491610000      2.357820000
C       -4.042660000     -3.100020000      1.055780000
C       -3.506860000     -1.846250000      3.499190000
H       -2.020740000     -0.721590000      2.427770000
C       -4.771100000     -3.448780000      2.198810000
H       -4.277310000     -3.589360000      0.116220000
C       -4.503420000     -2.826950000      3.422910000
H       -3.296440000     -1.351480000      4.444870000
H       -5.550040000     -4.204820000      2.127850000
H       -5.072360000     -3.098670000      4.309480000
C        2.682900000     -0.115390000      0.205040000
C        1.566320000      0.346190000     -0.710080000
H        3.432680000      0.685450000      0.234650000
C        0.286600000      0.378770000     -0.496250000
H       -0.861040000      1.234630000      1.654900000
H        3.188230000     -0.959480000     -0.286620000
C        6.264140000      1.555310000     -1.745860000
H        6.658860000      2.201530000     -2.539100000
H        6.430970000      2.073800000     -0.792390000
C        4.048690000      2.479440000     -2.008300000
C        2.681040000      2.209300000     -2.129950000
C        2.042690000      0.873130000     -2.158290000
H        2.727950000      0.092930000     -2.507330000
O        4.862020000      1.332260000     -1.943280000
O        4.603110000      3.616930000     -1.977110000
H        2.038710000      3.082690000     -2.222570000
H        1.166570000      0.855890000     -2.809230000
C        6.967300000      0.201620000     -1.752390000
H        6.765930000     -0.300870000     -2.707740000
H        6.534700000     -0.431550000     -0.966780000
C        8.483530000      0.324390000     -1.542300000
H        8.910030000      0.965280000     -2.325660000
H        8.680230000      0.833890000     -0.589340000
C        9.201030000     -1.032050000     -1.549880000
H        9.054250000     -1.552630000     -2.503650000
H       10.279670000     -0.913160000     -1.397930000
H        8.822490000     -1.685160000     -0.754620000
C        2.278320000     -0.518560000      1.629320000
H        1.539500000     -1.328820000      1.586800000
H        1.775430000      0.320700000      2.125370000
C        3.478210000     -0.969690000      2.475080000
H        3.979680000     -1.811300000      1.976440000
H        4.217170000     -0.156900000      2.519220000
C        3.097040000     -1.383590000      3.903800000
H        2.359390000     -2.197680000      3.861090000
H        2.594580000     -0.543010000      4.403420000
C        4.294470000     -1.832540000      4.753890000
H        4.796180000     -2.673620000      4.256460000
H        5.032100000     -1.019730000      4.797720000
C        3.904750000     -2.243630000      6.180050000
H        3.194170000     -3.078820000      6.171830000
H        4.780480000     -2.558000000      6.759050000
H        3.431830000     -1.412620000      6.717080000
H       -3.593600000     -0.084170000     -2.337860000
H       -4.941530000     -0.750960000     -4.296750000
H       -5.132320000     -3.155230000     -4.927980000
H       -3.956960000     -4.885070000     -3.569770000
H       -2.620930000     -4.230690000     -1.609500000
F       -0.767390000     -3.688230000      1.734280000
F        1.381890000     -5.211480000      1.376580000
F        2.788880000     -5.123460000     -0.968410000
F        1.970140000     -3.452920000     -2.978410000
F       -0.205320000     -1.919990000     -2.660870000
97                      
TS4c, CsRhC42PNH42O3F6                                            
C       -3.153050000     -2.251950000     -1.928260000 
C       -1.089230000     -2.513670000     -2.972000000 
C       -1.608830000     -3.510790000     -3.856390000 
C       -2.976740000     -3.862260000     -3.708520000 
C       -3.742110000     -3.243880000     -2.742190000 
H       -3.752900000     -1.745960000     -1.180190000 
C        0.298440000     -2.130550000     -3.022560000 
C       -0.755490000     -4.104690000     -4.823710000 
H       -3.408030000     -4.621090000     -4.359360000 
H       -4.789580000     -3.494120000     -2.598070000 
C        0.569750000     -3.707010000     -4.886260000 
C        1.095610000     -2.737530000     -4.005170000 
H       -1.152170000     -4.859400000     -5.498340000 
H        1.231010000     -4.151730000     -5.627790000 
H        2.142270000     -2.449760000     -4.079150000 
N       -1.878840000     -1.885690000     -2.033720000 
O        0.775870000     -1.249840000     -2.161200000 
Rh      -0.699320000     -0.422170000     -0.870450000 
F       -0.633770000      1.778770000     -3.059050000 
Cs       3.788850000     -1.443430000     -1.169740000 
P       -2.384990000      0.615780000      0.367140000 
C       -2.910350000     -0.281180000      1.921890000 
C       -2.485040000     -1.590900000      2.187570000 
C       -3.704660000      0.310450000      2.918360000 
C       -2.803930000     -2.263350000      3.366790000 
C       -4.035440000     -0.336210000      4.105580000 
C       -3.580220000     -1.632480000      4.332990000 
C       -2.031100000      2.305310000      1.030570000 
C       -2.509660000      3.459190000      0.393360000 
C       -1.209050000      2.440630000      2.161960000 
C       -2.176850000      4.727570000      0.884190000 
H       -3.153820000      3.386660000     -0.477330000 
C       -0.886320000      3.706580000      2.655780000 
H       -0.826600000      1.561980000      2.674790000 
C       -1.367110000      4.856080000      2.016680000 
H       -2.559530000      5.613060000      0.381200000 
H       -0.257260000      3.793250000      3.539160000 
C       -3.956120000      0.805140000     -0.587820000 
C       -3.851310000      1.285280000     -1.907960000 
C       -5.226830000      0.479660000     -0.084980000 
C       -4.994410000      1.458910000     -2.693400000 
H       -2.879400000      1.519490000     -2.333870000 
C       -6.367820000      0.640960000     -0.878960000 
H       -5.348130000      0.080500000      0.916730000 
C       -6.256680000      1.136410000     -2.182060000 
H       -4.894320000      1.836870000     -3.708500000 
H       -7.342300000      0.376280000     -0.474510000 
H       -7.145260000      1.262230000     -2.796830000 
H       -1.114290000      5.842070000      2.400540000 
C        2.260580000      2.402440000      0.461600000 
C        1.587820000      1.066840000      0.756640000 
H        3.341260000      2.216990000      0.374070000 
C        0.609040000      0.558200000      0.063680000 
H       -0.541650000      1.153050000     -2.319710000 
H        2.138880000      3.026040000      1.359200000 
C        5.872180000     -1.427710000      2.604740000 
H        5.809680000     -1.673270000      3.674410000 
H        6.094880000     -2.358280000      2.070450000 
C        3.490800000     -1.746890000      2.262640000 
C        2.268520000     -1.095630000      2.165810000 
C        2.074590000      0.380610000      2.106320000 
H        3.019580000      0.878090000      2.340580000 
O        4.622090000     -0.885060000      2.157570000 
O        3.708700000     -2.992880000      2.379160000 
H        1.391600000     -1.740150000      2.152270000 
H        1.345500000      0.726790000      2.853580000 
C        6.962100000     -0.388910000      2.359270000 
H        6.704120000      0.537020000      2.890140000 
H        6.984850000     -0.141800000      1.289170000 
C        8.349530000     -0.871650000      2.806620000 
H        8.320820000     -1.124200000      3.875100000 
H        8.600220000     -1.801670000      2.278810000 
C        9.453500000      0.165250000      2.560060000 
H        9.251470000      1.096130000      3.103110000 
H       10.430250000     -0.206800000      2.888920000 
H        9.533080000      0.413800000      1.495000000 
C        1.765070000      3.172790000     -0.767230000 
H        0.693280000      3.377160000     -0.659600000 
H        1.871340000      2.547150000     -1.662150000 
C        2.522110000      4.493090000     -0.973800000 
H        2.414520000      5.118020000     -0.075830000 
H        3.597090000      4.285130000     -1.074710000 
C        2.044740000      5.285000000     -2.199600000 
H        0.969890000      5.492640000     -2.100700000 
H        2.152660000      4.661870000     -3.098730000 
C        2.797120000      6.607250000     -2.408490000 
H        2.689180000      7.230810000     -1.510600000 
H        3.871350000      6.400740000     -2.509200000 
C        2.312650000      7.392560000     -3.634660000 
H        1.249130000      7.645700000     -3.548510000 
H        2.868550000      8.329310000     -3.755190000 
H        2.439900000      6.809570000     -4.554720000 
F       -1.740330000     -2.274650000      1.300910000 
F       -2.368610000     -3.516000000      3.572730000 
F       -3.895490000     -2.268120000      5.466450000 
F       -4.798810000      0.274840000      5.025040000 
F       -4.204040000      1.548220000      2.751960000 
97                    
INT4c, CsRhC42PNH42O3F6                                          
C       -0.122550000      3.602160000     -1.780710000
C       -2.247280000      2.760380000     -1.369190000
C       -2.865950000      3.831530000     -2.089910000
C       -2.009820000      4.810970000     -2.663990000
C       -0.645360000      4.696360000     -2.507900000
H        0.950810000      3.502200000     -1.660320000
C       -3.048050000      1.727120000     -0.747160000
C       -4.281400000      3.882320000     -2.202410000
H       -2.441980000      5.641960000     -3.219130000
H        0.039600000      5.426750000     -2.930920000
C       -5.041250000      2.890120000     -1.602570000
C       -4.445640000      1.831160000     -0.886380000
H       -4.747310000      4.697850000     -2.750520000
H       -6.127070000      2.924820000     -1.678500000
H       -5.069340000      1.075060000     -0.413190000
N       -0.881740000      2.660590000     -1.226590000
O       -2.473310000      0.743830000     -0.096850000
Rh      -0.324430000      0.908370000      0.049790000
F       -0.658910000     -0.632230000     -2.480380000
Cs      -3.438830000     -1.852790000     -1.757310000
P        1.933670000      1.187110000      0.185040000
C        2.441830000      2.604540000      1.284790000
C        1.483880000      3.598720000      1.544580000
C        3.722980000      2.744090000      1.849550000
C        1.800310000      4.711330000      2.333180000
C        4.038720000      3.851030000      2.642850000
C        3.079030000      4.841930000      2.884360000
C        3.008600000     -0.180660000      0.916240000
C        3.796890000     -1.070810000      0.176670000
C        2.978660000     -0.424550000      2.297450000
C        4.532220000     -2.102290000      0.762240000
C        3.700330000     -1.444290000      2.910550000
C        4.487980000     -2.292300000      2.137880000
C        2.825030000      1.598040000     -1.403990000
C        2.267950000      1.138770000     -2.610440000
C        4.005070000      2.359600000     -1.457940000
C        2.879640000      1.422480000     -3.835350000
H        1.351230000      0.557960000     -2.597520000
C        4.617010000      2.645840000     -2.683550000
H        4.456800000      2.746190000     -0.550800000
C        4.057770000      2.176810000     -3.877320000
H        2.431660000      1.056630000     -4.757120000
H        5.528820000      3.239320000     -2.702290000
H        4.532290000      2.402220000     -4.830170000
C        0.600000000     -3.099450000      0.912320000
C       -0.033200000     -1.935560000      1.624990000
H        0.011740000     -4.001670000      1.144550000
C       -0.313140000     -0.621350000      1.384490000
H       -0.447540000     -0.172700000     -1.602420000
H        1.586230000     -3.293860000      1.366170000
C       -4.585870000     -0.508520000      2.925060000
H       -4.754570000     -0.103530000      3.928270000
H       -4.777570000      0.288560000      2.200120000
C       -2.266970000      0.042850000      3.031110000
C       -0.850980000     -0.430640000      2.857710000
C       -0.516520000     -1.940350000      3.065970000
H       -1.375920000     -2.583510000      3.291010000
O       -3.197760000     -0.913600000      2.809620000
O       -2.571040000      1.190320000      3.350410000
H       -0.226360000      0.247590000      3.445570000
H        0.256210000     -2.110210000      3.831000000
C       -5.456380000     -1.729720000      2.662710000
H       -5.197410000     -2.517240000      3.381880000
H       -5.229350000     -2.124310000      1.663970000
C       -6.954280000     -1.405360000      2.764920000
H       -7.173860000     -1.006630000      3.764100000
H       -7.204820000     -0.607180000      2.053620000
C       -7.846720000     -2.624200000      2.496570000
H       -7.645430000     -3.428640000      3.213650000
H       -8.907650000     -2.363570000      2.576950000
H       -7.677340000     -3.025900000      1.490490000
C        0.761080000     -2.995410000     -0.609400000
H        1.272890000     -2.063030000     -0.868610000
H       -0.228680000     -2.921700000     -1.074900000
C        1.517470000     -4.189640000     -1.209830000
H        2.521730000     -4.246830000     -0.765090000
H        1.008530000     -5.122150000     -0.924900000
C        1.647490000     -4.134570000     -2.738680000
H        2.153170000     -3.202150000     -3.026400000
H        0.644460000     -4.086090000     -3.186210000
C        2.408790000     -5.327100000     -3.335480000
H        3.412400000     -5.374790000     -2.891330000
H        1.903810000     -6.259640000     -3.048510000
C        2.531860000     -5.265030000     -4.863920000
H        3.064190000     -4.360650000     -5.182300000
H        3.079590000     -6.128930000     -5.257440000
H        1.544420000     -5.252060000     -5.341050000
H        0.480640000      3.495190000      1.139960000
H        1.042670000      5.468840000      2.523040000
H        3.324860000      5.702520000      3.502950000
H        5.034370000      3.937290000      3.073170000
H        4.484770000      1.984830000      1.686870000
F        3.875770000     -0.992490000     -1.166630000
F        5.274430000     -2.924030000     -0.002860000
F        5.185090000     -3.284350000      2.711720000
F        3.637140000     -1.619180000      4.243220000
F        2.241830000      0.353870000      3.112490000
58                     
INT2d, CsRhC20PNH29O4F                                          
C        3.957010000      1.155140000     -0.785640000
C        3.191210000     -0.995450000     -1.248920000
C        4.473940000     -1.404680000     -1.731130000
C        5.514400000     -0.435920000     -1.715700000
C        5.255020000      0.833970000     -1.245900000
H        3.732800000      2.145030000     -0.403820000
C        2.077480000     -1.914070000     -1.230420000
C        4.655780000     -2.734190000     -2.197840000
H        6.505720000     -0.707560000     -2.074780000
H        6.027800000      1.597940000     -1.219540000
C        3.581290000     -3.610190000     -2.176290000
C        2.311360000     -3.216790000     -1.703390000
H        5.630870000     -3.045360000     -2.565110000
H        3.713200000     -4.630250000     -2.533660000
H        1.484120000     -3.923820000     -1.702080000
N        2.952600000      0.280350000     -0.783340000
O        0.905730000     -1.514870000     -0.783380000
Rh       0.883230000      0.540280000     -0.167990000
F        1.552130000     -0.556410000      2.554270000
Cs      -0.547560000     -2.865350000      1.674640000
P        0.767870000      2.673710000      0.425190000
C       -3.731140000      0.151450000      0.736450000
C       -2.281630000      0.296160000      0.495470000
H       -3.934020000     -0.803710000      1.242780000
C       -1.074800000      0.431340000      0.277090000
H        1.344600000     -0.082870000      1.698800000
H       -4.071880000      0.933690000      1.430110000
C       -4.588620000      0.219770000     -0.546490000
H       -4.256660000     -0.565110000     -1.238260000
H       -4.398860000      1.176500000     -1.049580000
C       -6.090850000      0.067350000     -0.271040000
H       -6.271710000     -0.890370000      0.237870000
H       -6.413040000      0.850970000      0.429560000
C       -6.954610000      0.136930000     -1.538760000
H       -6.632950000     -0.645670000     -2.240670000
H       -6.775400000      1.094760000     -2.047640000
C       -8.458420000     -0.016190000     -1.267570000
H       -8.639000000     -0.973900000     -0.760730000
H       -8.781040000      0.765590000     -0.566600000
C       -9.314140000      0.055890000     -2.539400000
H       -9.039980000     -0.735490000     -3.247320000
H      -10.380110000     -0.056940000     -2.311270000
H       -9.183530000      1.016870000     -3.051300000
O       -0.014940000      3.722530000     -0.578140000
C        0.239600000      3.623540000     -1.993910000
H        1.269740000      3.912950000     -2.228870000
H        0.054030000      2.606050000     -2.352580000
H       -0.450430000      4.316710000     -2.478770000
O        2.235660000      3.399140000      0.628160000
C        2.354130000      4.806420000      0.940010000
H        1.901920000      5.416000000      0.152880000
H        1.873860000      5.030160000      1.896500000
H        3.423120000      5.018060000      1.004400000
O       -0.062950000      3.198250000      1.738650000
C        0.129300000      2.524540000      2.999910000
H       -0.177660000      1.478810000      2.926750000
H        1.174260000      2.582260000      3.322340000
H       -0.501160000      3.049490000      3.720300000
79                    
TS3d, CsRhC27PNH41O6F                                          
C       -4.808160000     -1.570390000     -0.662600000
C       -4.463470000      0.730440000     -0.520260000
C       -5.866860000      0.996730000     -0.580980000
C       -6.736750000     -0.122270000     -0.683020000
C       -6.209580000     -1.395890000     -0.722620000
H       -4.370150000     -2.561600000     -0.696160000
C       -3.508500000      1.804590000     -0.412140000
C       -6.326920000      2.340030000     -0.538490000
H       -7.812680000      0.037820000     -0.729700000
H       -6.847600000     -2.272240000     -0.800720000
C       -5.401700000      3.367010000     -0.440260000
C       -4.014210000      3.113520000     -0.378600000
H       -7.393980000      2.543640000     -0.585590000
H       -5.745970000      4.399370000     -0.410440000
H       -3.310370000      3.940290000     -0.307040000
N       -3.957310000     -0.550790000     -0.564080000
O       -2.218250000      1.533870000     -0.349130000
Rh      -1.777540000     -0.549000000     -0.473510000
F       -1.665290000     -0.216810000      2.561420000
Cs      -0.419480000      2.781790000      1.944200000
P       -1.229450000     -2.711860000     -0.699030000
C        2.660210000     -0.013740000      0.264950000
C        1.356300000      0.139710000     -0.455610000
H        3.054390000      0.991930000      0.465890000
C        0.138820000     -0.216250000     -0.367740000
H       -1.679460000     -0.421160000      1.598270000
H        3.387960000     -0.475650000     -0.414930000
C        5.803190000      1.655320000     -2.230620000
H        6.063480000      2.461800000     -2.925970000
H        6.175400000      1.942540000     -1.239870000
C        3.640430000      2.614430000     -1.804470000
C        2.233040000      2.405130000     -1.771630000
C        1.568800000      1.166470000     -2.008490000
H        2.126580000      0.420190000     -2.572890000
O        4.373610000      1.498890000     -2.182840000
O        4.226810000      3.696040000     -1.569750000
H        1.648300000      3.276300000     -1.485640000
H        0.541900000      1.247310000     -2.349750000
C        6.408930000      0.330270000     -2.678980000
H        5.993680000      0.059940000     -3.658560000
H        6.105130000     -0.458430000     -1.978680000
C        7.941330000      0.386890000     -2.763570000
H        8.239570000      1.183210000     -3.458540000
H        8.351220000      0.665800000     -1.783620000
C        8.563970000     -0.940850000     -3.215150000
H        8.201910000     -1.230880000     -4.208570000
H        9.656180000     -0.870640000     -3.266030000
H        8.313980000     -1.752170000     -2.521350000
C        2.584460000     -0.821470000      1.570770000
H        2.217390000     -1.831020000      1.349960000
H        1.842790000     -0.363190000      2.238130000
C        3.938850000     -0.908960000      2.289230000
H        4.678180000     -1.367760000      1.617380000
H        4.305620000      0.106010000      2.499150000
C        3.884630000     -1.706450000      3.600400000
H        3.520680000     -2.722780000      3.392360000
H        3.144350000     -1.249330000      4.272690000
C        5.236370000     -1.793200000      4.324030000
H        5.976290000     -2.252150000      3.654360000
H        5.601120000     -0.778090000      4.531900000
C        5.172600000     -2.589320000      5.634350000
H        4.844710000     -3.620510000      5.456360000
H        6.151830000     -2.631910000      6.124580000
H        4.466820000     -2.135300000      6.340330000
O       -2.516410000     -3.728960000     -0.734940000
C       -2.363150000     -5.149900000     -0.976420000
H       -1.928670000     -5.324740000     -1.963870000
H       -1.729660000     -5.604240000     -0.210180000
H       -3.366290000     -5.576520000     -0.929720000
O       -0.198470000     -3.459600000      0.330460000
C       -0.495950000     -3.447750000      1.744300000
H       -0.529460000     -2.425420000      2.128420000
H       -1.447180000     -3.951120000      1.947200000
H        0.314320000     -3.996420000      2.226820000
O       -0.363780000     -3.142570000     -2.022090000
C       -0.711500000     -2.560560000     -3.297910000
H       -1.689720000     -2.918500000     -3.635480000
H       -0.717630000     -1.468290000     -3.236750000
H        0.057380000     -2.887390000     -3.999820000
79                   
INT3d, CsRhC27PNH41O6F                                           
C        5.010990000      0.975420000     -0.416860000
C        4.301990000     -1.206880000      0.000350000
C        5.643320000     -1.658290000      0.201990000
C        6.678490000     -0.693060000      0.081290000
C        6.363350000      0.614420000     -0.224840000
H        4.739050000      1.994270000     -0.668300000
C        3.189600000     -2.114870000      0.108940000
C        5.883390000     -3.024610000      0.507000000
H        7.713470000     -0.996300000      0.230680000
H        7.132460000      1.375560000     -0.325020000
C        4.808260000     -3.893330000      0.599550000
C        3.480290000     -3.455030000      0.403590000
H        6.903200000     -3.369380000      0.659670000
H        4.983180000     -4.943140000      0.828090000
H        2.656780000     -4.162390000      0.476930000
N        4.009710000      0.104000000     -0.308650000
O        1.956720000     -1.672170000     -0.068210000
Rh       1.858990000      0.395440000     -0.559490000
F        1.117890000      0.321800000      2.463730000
Cs      -0.446000000     -2.659880000      1.803110000
P        1.678780000      2.567910000     -1.145240000
C       -2.508560000      0.644810000     -0.165950000
C       -1.305420000      0.090380000     -0.900630000
H       -3.099840000     -0.209780000      0.186800000
C       -0.044410000      0.319800000     -0.716140000
H        1.326920000      0.412760000      1.517490000
H       -3.145440000      1.149030000     -0.906240000
C       -5.770700000     -1.950600000     -1.473180000
H       -6.065870000     -2.857330000     -2.014930000
H       -5.910520000     -2.151800000     -0.402960000
C       -3.458000000     -2.642580000     -1.423000000
C       -2.125320000     -2.266750000     -1.638820000
C       -1.649170000     -0.947120000     -2.101470000
H       -2.402540000     -0.410810000     -2.688100000
O       -4.395530000     -1.644090000     -1.737700000
O       -3.877320000     -3.763280000     -1.014650000
H       -1.384050000     -3.038110000     -1.440790000
H       -0.750060000     -1.033110000     -2.714400000
C       -6.615670000     -0.758820000     -1.912430000
H       -6.438860000     -0.569310000     -2.979430000
H       -6.279920000      0.136880000     -1.373870000
C       -8.115600000     -0.979120000     -1.667740000
H       -8.444070000     -1.881120000     -2.201410000
H       -8.286570000     -1.175600000     -0.600710000
C       -8.975900000      0.212730000     -2.108320000
H       -8.855940000      0.413570000     -3.179540000
H      -10.039490000      0.027020000     -1.921400000
H       -8.696720000      1.124630000     -1.567240000
C       -2.207180000      1.604710000      0.992740000
H       -1.633400000      2.459910000      0.615330000
H       -1.564920000      1.103870000      1.728660000
C       -3.482900000      2.108130000      1.683920000
H       -4.126290000      2.603710000      0.943000000
H       -4.056480000      1.249110000      2.060500000
C       -3.208250000      3.078370000      2.842060000
H       -2.634920000      3.938110000      2.466560000
H       -2.565730000      2.584560000      3.585080000
C       -4.481300000      3.586410000      3.534340000
H       -5.123910000      4.079780000      2.792570000
H       -5.054350000      2.728930000      3.912510000
C       -4.197320000      4.557670000      4.687990000
H       -3.656040000      5.444070000      4.335960000
H       -5.125150000      4.900560000      5.159770000
H       -3.585080000      4.083280000      5.464360000
O        3.122460000      3.309990000     -1.350070000
C        3.220680000      4.689280000     -1.790920000
H        2.788800000      4.801030000     -2.788380000
H        2.708950000      5.353730000     -1.090260000
H        4.285680000      4.923660000     -1.816760000
O        0.854470000      2.935090000     -2.506230000
C        1.089080000      2.146820000     -3.695650000
H        2.107690000      2.298560000     -4.066930000
H        0.920940000      1.084960000     -3.495050000
H        0.373000000      2.500920000     -4.438490000
O        0.833200000      3.620330000     -0.223610000
C        1.171890000      3.747370000      1.176990000
H        0.470430000      4.472860000      1.590940000
H        1.060150000      2.791260000      1.694790000
H        2.194680000      4.119030000      1.297200000
79                    
TS4d, CsRhC27PNH41O6F                                           
C       -3.952080000     -2.222080000      0.280340000
C       -2.436640000     -2.353380000     -1.486920000
C       -3.196350000     -3.382230000     -2.126160000
C       -4.381080000     -3.815450000     -1.474540000
C       -4.753410000     -3.242430000     -0.275860000
H       -4.239570000     -1.749650000      1.213760000
C       -1.210120000     -1.869340000     -2.066550000
C       -2.745100000     -3.921510000     -3.360320000
H       -4.986220000     -4.598610000     -1.928270000
H       -5.653000000     -3.553060000      0.248440000
C       -1.572460000     -3.439360000     -3.918210000
C       -0.810880000     -2.430370000     -3.288560000
H       -3.324450000     -4.701150000     -3.848790000
H       -1.221150000     -3.844490000     -4.865420000
H        0.108130000     -2.071250000     -3.747260000
N       -2.833660000     -1.783920000     -0.296320000
O       -0.500100000     -0.949500000     -1.438300000
Rh      -1.428800000     -0.217910000      0.331160000
F       -3.009000000      1.738410000     -1.507560000
Cs       1.953650000     -2.871410000     -0.320820000
P       -2.452120000      0.534590000      2.209840000
C        1.061940000      3.228170000      0.059980000
C        0.985410000      1.836310000      0.683070000
H        1.893920000      3.217570000     -0.658500000
C       -0.046980000      1.049110000      0.579420000
H       -2.435140000      1.239710000     -0.906860000
H        1.369070000      3.918450000      0.859220000
C        5.981800000     -0.255920000      0.458890000
H        6.487710000     -0.736950000      1.305160000
H        5.791150000     -1.036290000     -0.289880000
C        3.804810000     -0.544630000      1.479820000
C        2.585650000      0.036990000      1.793150000
C        2.231720000      1.468810000      1.570670000
H        3.078140000      1.981100000      1.104150000
O        4.748510000      0.331380000      0.887970000
O        4.145890000     -1.762570000      1.647870000
H        1.867800000     -0.608000000      2.297040000
H        2.031740000      2.008280000      2.512890000
C        6.853770000      0.848820000     -0.130950000
H        7.010560000      1.625100000      0.629740000
H        6.315940000      1.326150000     -0.960910000
C        8.211090000      0.328700000     -0.626110000
H        8.741990000     -0.154830000      0.205000000
H        8.049370000     -0.452200000     -1.381470000
C        9.096230000      1.432830000     -1.219670000
H        9.307190000      2.212870000     -0.478510000
H       10.056310000      1.032260000     -1.563940000
H        8.609260000      1.913500000     -2.076480000
C       -0.204080000      3.761410000     -0.620830000
H       -1.031270000      3.769750000      0.099840000
H       -0.505780000      3.080930000     -1.426040000
C       -0.006160000      5.173540000     -1.191600000
H        0.302340000      5.852380000     -0.383740000
H        0.822750000      5.160930000     -1.913510000
C       -1.261010000      5.738030000     -1.873170000
H       -2.090600000      5.750840000     -1.152100000
H       -1.570940000      5.060520000     -2.681150000
C       -1.066570000      7.150230000     -2.443900000
H       -0.757000000      7.827680000     -1.636490000
H       -0.239060000      7.138130000     -3.166200000
C       -2.325510000      7.707910000     -3.121410000
H       -3.162810000      7.766300000     -2.415640000
H       -2.153820000      8.715250000     -3.517450000
H       -2.641350000      7.071450000     -3.956690000
O       -4.076950000      0.348590000      2.250970000
C       -4.930780000      1.128990000      1.376810000
H       -4.918100000      2.177010000      1.686990000
H       -4.614670000      1.045110000      0.333420000
H       -5.935400000      0.719830000      1.492740000
O       -2.361810000      2.090790000      2.667930000
C       -1.288150000      2.625130000      3.478810000
H       -1.258470000      2.115990000      4.444650000
H       -0.330160000      2.522630000      2.966160000
H       -1.520850000      3.681610000      3.620590000
O       -2.071170000     -0.202580000      3.612190000
C       -1.548270000     -1.550480000      3.649450000
H       -2.364680000     -2.272580000      3.558380000
H       -0.817310000     -1.708970000      2.851200000
H       -1.063740000     -1.662610000      4.620420000
79                   
INT4d, CsRhC27PNH41O6F                                           
C       -4.257700000     -0.274160000      1.267150000
C       -2.857370000      1.582440000      1.336130000
C       -3.807660000      2.337990000      2.092680000
C       -5.030400000      1.694290000      2.427830000
C       -5.251640000      0.396510000      2.018040000
H       -4.409750000     -1.293740000      0.928350000
C       -1.584960000      2.157140000      0.954500000
C       -3.503780000      3.674030000      2.470830000
H       -5.780170000      2.234200000      3.003980000
H       -6.175650000     -0.123900000      2.257170000
C       -2.287430000      4.221080000      2.093870000
C       -1.340320000      3.485200000      1.349410000
H       -4.228030000      4.248040000      3.044090000
H       -2.049500000      5.246010000      2.374490000
H       -0.396470000      3.944480000      1.061050000
N       -3.099310000      0.289730000      0.932990000
O       -0.710870000      1.440140000      0.284530000
Rh      -1.444890000     -0.511890000     -0.308040000
F       -0.099070000     -1.455450000      2.187960000
Cs       1.560580000      1.181930000      2.621930000
P       -2.157590000     -2.492110000     -0.971420000
C        2.167680000     -2.319190000     -0.573220000
C        1.401630000     -1.445280000     -1.522090000
H        2.161920000     -3.355930000     -0.947550000
C        0.178330000     -0.848960000     -1.501060000
H       -0.568970000     -1.237810000      1.315690000
H        1.653200000     -2.335480000      0.394380000
C        1.282720000      3.269290000     -3.071000000
H        1.024780000      3.488720000     -4.111950000
H        0.485730000      3.666060000     -2.433800000
C        0.235050000      1.127370000     -3.225290000
C        0.355750000     -0.351400000     -2.987010000
C        1.763150000     -1.025050000     -2.940270000
H        2.610420000     -0.339680000     -3.052470000
O        1.344750000      1.828680000     -2.897570000
O       -0.778470000      1.671660000     -3.658010000
H       -0.341190000     -0.837240000     -3.677230000
H        1.874940000     -1.842040000     -3.668830000
C        2.641200000      3.845420000     -2.697180000
H        3.411480000      3.387130000     -3.330320000
H        2.875590000      3.570090000     -1.661030000
C        2.683310000      5.373170000     -2.851270000
H        2.440050000      5.642390000     -3.887580000
H        1.903250000      5.825360000     -2.224640000
C        4.046190000      5.970440000     -2.477320000
H        4.844110000      5.564320000     -3.109940000
H        4.047390000      7.059310000     -2.596950000
H        4.303500000      5.749080000     -1.434800000
C        3.635070000     -1.891960000     -0.372060000
H        3.661920000     -0.866070000      0.021760000
H        4.141110000     -1.857740000     -1.346530000
C        4.414370000     -2.821790000      0.568820000
H        3.907880000     -2.858260000      1.544120000
H        4.382400000     -3.846410000      0.171370000
C        5.878030000     -2.405660000      0.774390000
H        5.912040000     -1.380820000      1.171620000
H        6.385510000     -2.370910000     -0.200360000
C        6.657580000     -3.336200000      1.715040000
H        6.152310000     -3.371070000      2.689910000
H        6.626030000     -4.360110000      1.318450000
C        8.119040000     -2.912610000      1.914250000
H        8.185150000     -1.905450000      2.343210000
H        8.645640000     -3.596550000      2.589540000
H        8.662220000     -2.902180000      0.961650000
O       -3.580860000     -2.972980000     -0.276720000
C       -4.267310000     -4.172650000     -0.698560000
H       -4.617020000     -4.075060000     -1.730130000
H       -3.613840000     -5.046100000     -0.620400000
H       -5.121820000     -4.290790000     -0.029150000
O       -1.261120000     -3.872130000     -0.893950000
C       -0.824560000     -4.340260000      0.397890000
H       -0.329700000     -3.548820000      0.965430000
H       -1.672800000     -4.726220000      0.974550000
H       -0.118700000     -5.150790000      0.206880000
O       -2.463350000     -2.711610000     -2.581880000
C       -3.246870000     -1.706910000     -3.256410000
H       -4.284480000     -1.719790000     -2.904160000
H       -2.823280000     -0.708720000     -3.106820000
H       -3.223550000     -1.959750000     -4.318400000
2
CsCl, CsCl                                           
Cs       0.000000000      0.000000000      0.829260000
Cl       0.000000000      0.000000000     -2.682900000
40                      
LE-TS1Ba, CsRhC17NH18OCl                                           
C        1.572560000     -0.353610000      2.283380000
C        2.512420000     -0.257080000      0.147860000
C        3.835430000     -0.174500000      0.679340000
C        3.973220000     -0.174550000      2.095480000
C        2.845460000     -0.241550000      2.885670000
H        0.683530000     -0.419820000      2.901940000
C        2.262120000     -0.168890000     -1.266290000
C        4.932850000     -0.073390000     -0.216680000
H        4.964200000     -0.106770000      2.540390000
H        2.909530000     -0.221720000      3.970410000
C        4.691710000     -0.033960000     -1.582740000
C        3.384130000     -0.073410000     -2.110800000
H        5.943990000     -0.017100000      0.179050000
H        5.531070000      0.041450000     -2.272180000
H        3.225080000     -0.023380000     -3.186320000
N        1.399950000     -0.385510000      0.960080000
O        1.019250000     -0.151900000     -1.692750000
Rh      -0.377270000     -0.506620000     -0.063710000
C       -0.940180000     -2.085630000      1.305080000
H       -0.103170000     -2.151700000      1.996630000
C       -1.796250000     -0.975750000      1.521960000
H       -1.523220000     -0.330220000      2.360480000
C       -1.286380000     -3.474370000      0.752390000
H       -0.496780000     -4.157100000      1.087520000
H       -2.201070000     -3.835550000      1.233670000
C       -3.284500000     -0.864560000      1.212390000
H       -3.823740000     -0.925400000      2.170890000
H       -3.480750000      0.136890000      0.814880000
C       -1.388420000     -3.648270000     -0.775600000
H       -0.378120000     -3.564760000     -1.194110000
H       -1.702190000     -4.683450000     -0.982760000
C       -3.918760000     -1.909600000      0.263900000
H       -4.979310000     -1.647060000      0.163920000
H       -3.901830000     -2.894820000      0.734550000
C       -3.314920000     -1.962400000     -1.120380000
H       -3.766010000     -1.289860000     -1.848070000
C       -2.269500000     -2.692540000     -1.545370000
H       -1.996160000     -2.586260000     -2.596630000
Cs       0.795590000      2.821380000     -2.891170000
Cl      -2.002360000      1.255130000     -1.325870000
40                       
LE-INT1Ba, CsRhC17NH18OCl                                           
C       -0.661140000      2.993760000     -0.794280000
C        1.453650000      2.370450000     -0.037200000
C        2.055220000      3.531760000     -0.612950000
C        1.203600000      4.436070000     -1.305290000
C       -0.145150000      4.165070000     -1.392220000
H       -1.723110000      2.780500000     -0.861600000
C        2.240390000      1.403540000      0.684940000
C        3.454380000      3.733480000     -0.471160000
H        1.624410000      5.332320000     -1.757510000
H       -0.827130000      4.833250000     -1.911510000
C        4.205760000      2.799690000      0.225940000
C        3.618570000      1.651690000      0.799080000
H        3.915180000      4.616190000     -0.907960000
H        5.278040000      2.950700000      0.339500000
H        4.231320000      0.937780000      1.345810000
N        0.096480000      2.116300000     -0.137590000
O        1.653050000      0.342840000      1.202180000
Rh      -0.449900000      0.342990000      0.825750000
C       -2.578470000      0.818620000      0.945380000
H       -2.585130000      1.904820000      0.850940000
C       -2.320080000      0.118670000     -0.252350000
H       -2.194890000      0.737650000     -1.143880000
C       -3.359030000      0.369470000      2.179340000
H       -2.669180000      0.184050000      3.009940000
H       -3.979320000      1.222230000      2.488330000
C       -2.737810000     -1.294040000     -0.617360000
H       -2.052070000     -1.659630000     -1.393090000
H       -2.621700000     -1.973550000      0.223910000
C       -4.280920000     -0.864450000      2.044030000
H       -3.673270000     -1.752030000      1.866810000
H       -4.757180000     -1.017130000      3.020750000
C       -4.167110000     -1.362080000     -1.198070000
H       -4.360520000     -2.392080000     -1.536570000
H       -4.203030000     -0.755690000     -2.114810000
C       -5.318430000     -0.921150000     -0.320780000
H       -6.244480000     -0.750530000     -0.874590000
C       -5.375110000     -0.715190000      1.006850000
H       -6.335890000     -0.374070000      1.397580000
Cs       2.707920000     -2.614810000      1.077560000
Cl      -0.623000000     -1.771420000      2.116940000
83                        
LE-TS2Ba, CsRhC38PNH30OClF9                                          
C       -1.062160000     -0.198810000     -3.533530000
C       -1.575460000     -2.031220000     -2.180720000
C       -1.440910000     -2.935140000     -3.283280000
C       -1.099470000     -2.383380000     -4.549120000
C       -0.903840000     -1.025380000     -4.668380000
H       -0.918630000      0.872430000     -3.620970000
C       -1.885400000     -2.515490000     -0.851250000
C       -1.636590000     -4.325780000     -3.078070000
H       -0.989020000     -3.041990000     -5.408820000
H       -0.632490000     -0.569400000     -5.616980000
C       -1.942990000     -4.785310000     -1.804340000
C       -2.062410000     -3.908920000     -0.709050000
H       -1.535160000     -5.010270000     -3.916820000
H       -2.089110000     -5.852050000     -1.640200000
H       -2.288130000     -4.298460000      0.281900000
N       -1.392630000     -0.669240000     -2.331890000
O       -1.974070000     -1.676220000      0.144110000
Rh      -1.717390000      0.438710000     -0.595320000
C       -1.947440000      2.377410000     -1.544820000
H       -1.340590000      2.352450000     -2.450610000
C       -3.157920000      1.619820000     -1.641260000
H       -3.304160000      1.114320000     -2.600160000
C       -1.701010000      3.674120000     -0.766210000
H       -1.128060000      3.470760000      0.143250000
H       -1.058440000      4.308370000     -1.391520000
C       -4.489010000      1.905590000     -0.969540000
H       -5.044740000      0.960880000     -0.896210000
H       -4.351600000      2.249100000      0.053920000
C       -2.932600000      4.518070000     -0.354060000
H       -3.499310000      3.981640000      0.407640000
H       -2.551720000      5.422800000      0.137410000
C       -5.370210000      2.884950000     -1.779090000
H       -6.338570000      2.994070000     -1.265250000
H       -5.616440000      2.413510000     -2.741440000
C       -4.823900000      4.263570000     -2.083260000
H       -5.340670000      4.767170000     -2.903430000
C       -3.819610000      4.943830000     -1.503500000
H       -3.596620000      5.926710000     -1.923900000
Cs      -4.274300000     -1.541470000      2.233910000
P        1.111090000      0.172330000      0.226870000
C        1.989080000      1.804320000      0.183050000
C        1.742550000      2.640460000     -0.921800000
C        2.843970000      2.269450000      1.195670000
C        2.351620000      3.890190000     -1.028750000
H        1.065260000      2.314180000     -1.706480000
C        3.444820000      3.528450000      1.105190000
H        3.054750000      1.654710000      2.065530000
C        3.205900000      4.335490000     -0.011840000
H        2.156590000      4.513610000     -1.897690000
H        4.105660000      3.867790000      1.898740000
C        1.617470000     -0.492010000      1.886670000
C        2.776330000     -1.254800000      2.113280000
C        0.770190000     -0.212150000      2.974500000
C        3.085710000     -1.724460000      3.391980000
H        3.453330000     -1.486060000      1.295850000
C        1.079360000     -0.670010000      4.257190000
H       -0.142050000      0.358730000      2.812220000
C        2.238960000     -1.426280000      4.465940000
H        3.989480000     -2.307940000      3.548410000
H        0.416890000     -0.438030000      5.087540000
C        2.150710000     -0.864340000     -0.907290000
C        1.768170000     -2.211200000     -1.066820000
C        3.241110000     -0.388170000     -1.651960000
C        2.463630000     -3.058850000     -1.926360000
H        0.921330000     -2.607300000     -0.512880000
C        3.936820000     -1.229450000     -2.526720000
H        3.568890000      0.642330000     -1.554390000
C        3.548290000     -2.564590000     -2.664700000
H        2.150130000     -4.094590000     -2.031900000
H        4.778060000     -0.839120000     -3.093170000
Cl      -2.261080000      1.373550000      1.664980000
C        2.544420000     -1.966640000      5.836310000
F        2.096250000     -1.153410000      6.827090000
F        1.959670000     -3.183240000      6.049810000
F        3.874380000     -2.144840000      6.041550000
C        4.308760000     -3.494730000     -3.568590000
F        5.073910000     -2.837270000     -4.474830000
F        5.154250000     -4.311470000     -2.872030000
F        3.485990000     -4.320150000     -4.270220000
C        3.817680000      5.706890000     -0.096570000
F        2.996710000      6.668600000      0.421110000
F        4.986880000      5.798990000      0.586680000
F        4.076400000      6.081140000     -1.376480000
63 
CATBa, CsRhC30PNH18OClF9                                           
C       -1.254740000     -2.897400000      0.215950000
C       -3.280030000     -2.133670000     -0.639340000
C       -3.896940000     -3.409520000     -0.447640000
C       -3.099830000     -4.447050000      0.108820000
C       -1.786840000     -4.187220000      0.435990000
H       -0.223850000     -2.697400000      0.480620000
C       -4.017070000     -1.032210000     -1.202320000
C       -5.256910000     -3.589300000     -0.815370000
H       -3.533450000     -5.432470000      0.269300000
H       -1.143840000     -4.952540000      0.862700000
C       -5.959890000     -2.522730000     -1.355950000
C       -5.359800000     -1.261860000     -1.550940000
H       -5.726530000     -4.559180000     -0.670110000
H       -7.002040000     -2.656330000     -1.641600000
H       -5.931040000     -0.442720000     -1.983100000
N       -1.958130000     -1.889570000     -0.302790000
O       -3.418900000      0.127300000     -1.367650000
Rh      -1.380930000      0.087720000     -0.753170000
Cs      -4.605780000      2.862570000     -0.358940000
P        0.794800000      0.000370000     -0.048180000
C        1.953510000     -1.018430000     -1.094540000
C        1.401350000     -1.898050000     -2.038330000
C        3.354620000     -0.924120000     -1.001630000
C        2.220090000     -2.681440000     -2.857350000
H        0.321580000     -1.957890000     -2.146340000
C        4.179500000     -1.699370000     -1.816650000
H        3.816530000     -0.235530000     -0.298770000
C        3.609520000     -2.584070000     -2.741690000
H        1.772690000     -3.358330000     -3.580280000
H        5.259900000     -1.615500000     -1.726880000
C        1.771360000      1.576010000      0.080430000
C        2.118880000      2.161460000      1.305710000
C        2.136250000      2.233240000     -1.108920000
C        2.823970000      3.369420000      1.349280000
H        1.853540000      1.684740000      2.244240000
C        2.848640000      3.429670000     -1.074520000
H        1.861170000      1.812710000     -2.071720000
C        3.190000000      4.002310000      0.159060000
H        3.084090000      3.806300000      2.309660000
H        3.124390000      3.920300000     -2.004860000
C        1.003310000     -0.707010000      1.664720000
C        0.011840000     -0.379550000      2.607630000
C        2.061050000     -1.537950000      2.066160000
C        0.082570000     -0.849910000      3.919360000
H       -0.831000000      0.238150000      2.305590000
C        2.132780000     -2.025130000      3.374670000
H        2.836210000     -1.830070000      1.365200000
C        1.144080000     -1.679420000      4.301120000
H       -0.694290000     -0.583980000      4.631840000
H        2.953870000     -2.676760000      3.661940000
Cl      -1.213400000      2.422410000     -1.488410000
C        1.241850000     -2.160910000      5.724520000
F        1.925020000     -3.327650000      5.833160000
F        1.888720000     -1.261490000      6.522380000
F        0.023010000     -2.360140000      6.287930000
C        4.507570000     -3.384660000     -3.647320000
F        3.889300000     -4.474530000     -4.164380000
F        4.946790000     -2.649230000     -4.709960000
F        5.621580000     -3.826400000     -3.006990000
C        3.993990000      5.272890000      0.188040000
F        5.327570000      5.040910000      0.000450000
F        3.623640000      6.141950000     -0.789540000
F        3.885230000      5.935030000      1.366960000
43
P(4-CF3C6H4)3, C21PH12F9                                          
P        1.815810000     -0.280620000      0.065100000
C        2.773560000      0.237130000      1.564120000
C        2.289270000      1.355460000      2.268670000
C        3.905480000     -0.431130000      2.058590000
C        2.930150000      1.810530000      3.421490000
H        1.403340000      1.880320000      1.915680000
C        4.545290000      0.010340000      3.220540000
H        4.302380000     -1.300230000      1.541580000
C        4.061400000      1.134960000      3.897160000
H        2.547000000      2.682700000      3.945180000
H        5.423010000     -0.516560000      3.585880000
C        2.506190000     -1.961420000     -0.297480000
C        3.529000000     -2.222380000     -1.223740000
C        1.917240000     -3.045850000      0.380100000
C        3.961270000     -3.530510000     -1.461620000
H        4.001870000     -1.408930000     -1.766770000
C        2.352320000     -4.352740000      0.158410000
H        1.110770000     -2.871890000      1.090270000
C        3.377460000     -4.593940000     -0.765540000
H        4.757280000     -3.712940000     -2.178890000
H        1.891930000     -5.175470000      0.699670000
C        2.560550000      0.760960000     -1.273940000
C        1.877470000      0.791730000     -2.504540000
C        3.712660000      1.550000000     -1.124460000
C        2.345090000      1.566570000     -3.566380000
H        0.969110000      0.207070000     -2.638800000
C        4.180060000      2.339620000     -2.179310000
H        4.258410000      1.557280000     -0.185200000
C        3.496800000      2.346530000     -3.399810000
H        1.804330000      1.574910000     -4.509320000
H        5.071570000      2.946550000     -2.043840000
C        4.024030000      3.155770000     -4.554340000
F        4.733640000      4.238820000     -4.149210000
F        4.860570000      2.425730000     -5.349620000
F        3.033060000      3.610050000     -5.363530000
C        3.806830000     -6.008630000     -1.048310000
F        5.079600000     -6.083360000     -1.511440000
F        3.737930000     -6.799430000      0.053490000
F        3.019430000     -6.602740000     -1.992730000
C        4.719310000      1.589260000      5.172550000
F        4.648730000      2.934870000      5.339630000
F        4.132380000      1.037400000      6.275200000
F        6.031670000      1.250510000      5.230000000
85
INT1Bb, LiRhC38PNH32OF10                                           
C        2.807780000      2.136400000      0.803630000
C        1.722600000      3.934550000     -0.203850000
C        2.738120000      4.845300000      0.225420000
C        3.817160000      4.313880000      0.979960000
C        3.851930000      2.966070000      1.266950000
H        2.832970000      1.074810000      1.024130000
C        0.605400000      4.404060000     -0.971820000
C        2.634150000      6.220750000     -0.112210000
H        4.608200000      4.977900000      1.324090000
H        4.662210000      2.524670000      1.840540000
C        1.550160000      6.657040000     -0.853090000
C        0.542850000      5.763950000     -1.281630000
H        3.407440000      6.911010000      0.215940000
H        1.463080000      7.709440000     -1.115480000
H       -0.301220000      6.130210000     -1.862280000
N        1.775110000      2.586490000      0.096250000
O       -0.324910000      3.534270000     -1.359040000
Rh       0.046690000      1.540860000     -0.709470000
F       -2.709930000      3.916630000     -3.918580000
P        0.526740000     -0.613650000     -0.029640000
C        0.397750000     -0.931270000      1.789150000
C        0.301840000      0.165200000      2.659050000
C        0.370730000     -2.231280000      2.327990000
C        0.203540000     -0.024470000      4.040850000
H        0.285960000      1.175980000      2.260190000
C        0.270250000     -2.427310000      3.704560000
H        0.413070000     -3.102040000      1.678390000
C        0.188580000     -1.320850000      4.560640000
H        0.126200000      0.835980000      4.699680000
H        0.247010000     -3.438180000      4.104590000
C       -0.509430000     -1.974160000     -0.739910000
C       -0.072190000     -2.753370000     -1.820670000
C       -1.804550000     -2.182700000     -0.232960000
C       -0.905220000     -3.726450000     -2.380970000
H        0.922670000     -2.622710000     -2.235340000
C       -2.637980000     -3.154450000     -0.784230000
H       -2.170250000     -1.599110000      0.608300000
C       -2.185720000     -3.929410000     -1.859750000
H       -0.545490000     -4.327620000     -3.211750000
H       -3.631610000     -3.309190000     -0.371200000
C        2.252100000     -1.105860000     -0.496450000
C        2.753530000     -0.606240000     -1.711950000
C        3.071950000     -1.936030000      0.284450000
C        4.036180000     -0.941510000     -2.148020000
H        2.141540000      0.054120000     -2.322530000
C        4.360840000     -2.266140000     -0.141530000
H        2.726670000     -2.328250000      1.235400000
C        4.838900000     -1.773950000     -1.360480000
H        4.403100000     -0.553150000     -3.094540000
H        4.982470000     -2.909530000      0.475810000
C       -3.155630000      1.520640000     -0.023580000
C       -2.076960000      1.217330000     -0.991280000
H       -3.032540000      0.871650000      0.852780000
C       -1.495420000      0.864020000     -2.045580000
H       -1.404630000      0.419290000     -3.025860000
H       -3.027230000      2.546490000      0.343180000
C       -4.567040000      1.339740000     -0.622180000
H       -4.672340000      0.310090000     -0.984860000
H       -4.672190000      1.993200000     -1.496880000
C       -5.673130000      1.650530000      0.395760000
H       -5.555340000      0.997540000      1.271750000
H       -5.552690000      2.680020000      0.760610000
C       -7.086190000      1.477850000     -0.179990000
H       -7.205460000      0.448690000     -0.546980000
H       -7.203210000      2.130610000     -1.056430000
C       -8.199770000      1.785670000      0.831700000
H       -8.083400000      1.133380000      1.707730000
H       -8.081360000      2.814180000      1.198390000
C       -9.609050000      1.611190000      0.250210000
H       -9.771710000      0.582820000     -0.093940000
H       -9.769630000      2.276130000     -0.606790000
H      -10.379290000      1.837980000      0.995940000
Li      -1.672920000      3.420420000     -2.665840000
C       -3.104380000     -4.948520000     -2.481010000
F       -3.932610000     -4.387680000     -3.409190000
F       -2.428990000     -5.936890000     -3.117510000
F       -3.909240000     -5.543170000     -1.563520000
C        0.115780000     -1.548710000      6.049060000
F       -0.312670000     -0.455540000      6.723620000
F       -0.721790000     -2.568870000      6.369450000
F        1.332820000     -1.876190000      6.569300000
C        6.244850000     -2.095640000     -1.798710000
F        7.143470000     -1.185540000     -1.324790000
F        6.658070000     -3.308790000     -1.355170000
F        6.376580000     -2.097980000     -3.148130000
85                      
INT2Bb, LiRhC38PNH32OF10                                           
C       -3.768420000      1.180860000     -0.051350000
C       -3.208050000      3.314880000     -0.782850000
C       -4.572790000      3.740090000     -0.732770000
C       -5.542010000      2.788390000     -0.315270000
C       -5.139340000      1.515280000      0.023420000
H       -3.450020000      0.181130000      0.222630000
C       -2.182040000      4.231530000     -1.195920000
C       -4.907530000      5.072580000     -1.093440000
H       -6.590680000      3.076160000     -0.266510000
H       -5.849370000      0.759770000      0.348900000
C       -3.906020000      5.942570000     -1.487310000
C       -2.555400000      5.532970000     -1.540320000
H       -5.946590000      5.390740000     -1.054000000
H       -4.155720000      6.964930000     -1.764410000
H       -1.782200000      6.231050000     -1.854490000
N       -2.822040000      2.032210000     -0.439400000
O       -0.921960000      3.812540000     -1.240230000
Rh      -0.676770000      1.742510000     -0.657800000
F        2.096350000      4.107870000      0.472650000
P       -0.484460000     -0.434370000     -0.008280000
C       -1.217500000     -1.679550000     -1.181850000
C       -2.063930000     -1.221690000     -2.202980000
C       -0.937080000     -3.056610000     -1.105200000
C       -2.637700000     -2.112990000     -3.114780000
H       -2.261850000     -0.157620000     -2.300030000
C       -1.502260000     -3.952230000     -2.012620000
H       -0.262840000     -3.442280000     -0.344760000
C       -2.355330000     -3.478030000     -3.018070000
H       -3.287260000     -1.738210000     -3.901080000
H       -1.270280000     -5.012150000     -1.940060000
C        1.192120000     -1.180690000      0.268290000
C        1.687260000     -1.490850000      1.541780000
C        2.014450000     -1.405900000     -0.851160000
C        2.972800000     -2.021430000      1.700300000
H        1.079710000     -1.333730000      2.427770000
C        3.289940000     -1.944230000     -0.702500000
H        1.659190000     -1.164540000     -1.849470000
C        3.770520000     -2.254020000      0.578190000
H        3.336620000     -2.261380000      2.695660000
H        3.905670000     -2.123370000     -1.580710000
C       -1.337760000     -0.777470000      1.610710000
C       -1.271860000      0.232710000      2.587890000
C       -2.037580000     -1.956910000      1.909690000
C       -1.870360000      0.063670000      3.836790000
H       -0.757420000      1.164300000      2.362980000
C       -2.651100000     -2.128840000      3.154100000
H       -2.127790000     -2.752300000      1.177060000
C       -2.565820000     -1.118850000      4.117180000
H       -1.807420000      0.856640000      4.577880000
H       -3.197730000     -3.044780000      3.362370000
C        3.914120000      2.013860000     -1.723130000
C        2.499770000      2.002450000     -1.283200000
H        4.070640000      1.158000000     -2.393530000
C        1.296630000      1.844170000     -1.018090000
H        2.217060000      3.178700000      0.136630000
H        4.107200000      2.911090000     -2.325710000
C        4.938490000      1.947990000     -0.570140000
H        4.744220000      1.050450000      0.029060000
H        4.788340000      2.808140000      0.095150000
C        6.388930000      1.935260000     -1.071320000
H        6.535450000      1.072600000     -1.736290000
H        6.569360000      2.829520000     -1.684550000
C        7.422570000      1.881850000      0.062790000
H        7.241990000      0.987820000      0.675760000
H        7.275810000      2.744220000      0.728510000
C        8.875970000      1.869230000     -0.432990000
H        9.024410000      1.006670000     -1.096650000
H        9.056840000      2.761830000     -1.047100000
C        9.903220000      1.818120000      0.705850000
H        9.771460000      0.918370000      1.318700000
H       10.928560000      1.809690000      0.319110000
H        9.804670000      2.686570000      1.368120000
Li       0.836710000      4.231240000     -1.032730000
C        5.165560000     -2.796060000      0.730270000
F        6.109970000     -1.813830000      0.633970000
F        5.365000000     -3.402160000      1.926420000
F        5.472100000     -3.706770000     -0.231670000
C       -3.183570000     -1.314760000      5.476850000
F       -3.667180000     -0.157050000      5.995280000
F       -4.209330000     -2.201350000      5.459450000
F       -2.278980000     -1.789780000      6.381820000
C       -2.988060000     -4.459670000     -3.969340000
F       -3.462670000     -3.867910000     -5.091980000
F       -2.117410000     -5.424580000     -4.366050000
F       -4.042710000     -5.111220000     -3.398870000
85                      
TS2Bb, LiRhC38PNH32OF10                                          
C        2.670410000      2.431550000      0.623990000
C        1.438690000      4.084590000     -0.451110000
C        2.370490000      5.096400000     -0.060100000
C        3.489890000      4.694820000      0.717550000
C        3.635350000      3.367990000      1.057450000
H        2.792640000      1.386600000      0.884380000
C        0.285410000      4.429060000     -1.231830000
C        2.148550000      6.443780000     -0.451880000
H        4.218120000      5.438620000      1.035610000
H        4.476600000      3.019510000      1.650490000
C        1.032330000      6.758360000     -1.206450000
C        0.105240000      5.765750000     -1.594630000
H        2.858480000      7.210190000     -0.150230000
H        0.855280000      7.788980000     -1.507580000
H       -0.771970000      6.034410000     -2.180240000
N        1.603670000      2.754810000     -0.104340000
O       -0.568720000      3.468640000     -1.586750000
Rh      -0.058220000      1.543460000     -0.734650000
F       -1.622940000      1.331650000     -3.716770000
P        0.641150000     -0.498570000      0.012100000
C        0.597450000     -0.760000000      1.852030000
C        0.415180000      0.362660000      2.674430000
C        0.715980000     -2.025930000      2.454950000
C        0.374030000      0.234870000      4.065710000
H        0.286380000      1.343230000      2.223530000
C        0.672120000     -2.162870000      3.842470000
H        0.827270000     -2.920590000      1.847550000
C        0.502060000     -1.029430000      4.647800000
H        0.227260000      1.115610000      4.685240000
H        0.760450000     -3.149710000      4.290030000
C       -0.233460000     -2.018720000     -0.597520000
C        0.251470000     -2.769120000     -1.677690000
C       -1.456110000     -2.392900000     -0.010770000
C       -0.459350000     -3.873020000     -2.160620000
H        1.192020000     -2.511990000     -2.155140000
C       -2.164580000     -3.496870000     -0.479390000
H       -1.861300000     -1.827380000      0.823700000
C       -1.664430000     -4.239930000     -1.557780000
H       -0.062700000     -4.444880000     -2.994950000
H       -3.101460000     -3.777340000     -0.003640000
C        2.405970000     -0.861210000     -0.464230000
C        2.849830000     -0.352670000     -1.698110000
C        3.303570000     -1.606380000      0.317230000
C        4.148090000     -0.594860000     -2.150290000
H        2.175320000      0.246380000     -2.305800000
C        4.608510000     -1.842800000     -0.122480000
H        3.006440000     -2.004120000      1.281900000
C        5.027760000     -1.342790000     -1.359940000
H        4.467740000     -0.200370000     -3.111380000
H        5.288800000     -2.420350000      0.498210000
C       -4.475600000      0.004830000     -0.743500000
C       -3.096840000      0.433040000     -0.991520000
H       -4.795410000     -0.632740000     -1.579910000
C       -1.928830000      0.774860000     -1.235270000
H       -1.731970000      0.957650000     -2.508230000
H       -4.476210000     -0.650250000      0.139550000
C       -5.483730000      1.156630000     -0.544000000
H       -5.152400000      1.778130000      0.296800000
H       -5.469280000      1.798980000     -1.432980000
C       -6.909850000      0.650610000     -0.289630000
H       -7.227860000      0.021540000     -1.132990000
H       -6.912320000     -0.000130000      0.596200000
C       -7.927190000      1.783120000     -0.090030000
H       -7.609550000      2.411980000      0.753660000
H       -7.923000000      2.434790000     -0.975200000
C       -9.357350000      1.283890000      0.162410000
H       -9.362580000      0.632920000      1.047090000
H       -9.675470000      0.656060000     -0.680830000
C      -10.368480000      2.420970000      0.360630000
H      -11.377410000      2.031740000      0.537950000
H      -10.097910000      3.047280000      1.219110000
H      -10.412880000      3.070550000     -0.521730000
Li      -1.147190000      3.001450000     -3.293410000
C       -2.459040000     -5.407330000     -2.077050000
F       -3.537110000     -5.006070000     -2.812210000
F       -1.730420000     -6.223090000     -2.877460000
F       -2.955860000     -6.178340000     -1.072610000
C        0.498040000     -1.177560000      6.147060000
F       -0.155420000     -0.165040000      6.767920000
F       -0.086950000     -2.334760000      6.549200000
F        1.763230000     -1.191240000      6.658480000
C        6.447180000     -1.561580000     -1.814220000
F        7.280820000     -0.576050000     -1.370860000
F        6.961880000     -2.730640000     -1.356600000
F        6.561030000     -1.578680000     -3.165730000
85                      
INT1Bc, NaRhC38PNH32OF10                                           
C        2.962890000      1.743040000      1.113920000
C        2.229430000      3.691880000      0.071650000
C        3.324860000      4.442690000      0.603530000
C        4.252120000      3.751450000      1.427890000
C        4.071980000      2.408500000      1.680910000
H        2.821130000      0.685140000      1.305520000
C        1.251250000      4.322260000     -0.773300000
C        3.443840000      5.823840000      0.295390000
H        5.097800000      4.290350000      1.851650000
H        4.761850000      1.847470000      2.305360000
C        2.494220000      6.419600000     -0.517230000
C        1.410190000      5.686040000     -1.046880000
H        4.276440000      6.392900000      0.701680000
H        2.576900000      7.478030000     -0.756830000
H        0.674830000      6.177510000     -1.680870000
N        2.065320000      2.346920000      0.339660000
O        0.248230000      3.605380000     -1.263230000
Rh       0.249880000      1.583390000     -0.575010000
F       -0.548940000      1.769510000     -4.712930000
P        0.398860000     -0.626280000      0.050570000
C        0.154260000     -1.000290000      1.850260000
C        0.144670000      0.069710000      2.757880000
C       -0.048320000     -2.304840000      2.338890000
C       -0.038650000     -0.151990000      4.126210000
H        0.264060000      1.087380000      2.395580000
C       -0.235100000     -2.533340000      3.701510000
H       -0.078380000     -3.152730000      1.659160000
C       -0.228110000     -1.454090000      4.595350000
H       -0.046820000      0.689520000      4.813490000
H       -0.394330000     -3.547100000      4.061190000
C       -0.768170000     -1.822610000     -0.751920000
C       -0.401810000     -2.564470000     -1.884000000
C       -2.084410000     -1.930630000     -0.269410000
C       -1.323450000     -3.402970000     -2.517850000
H        0.605670000     -2.507180000     -2.284630000
C       -3.007310000     -2.768250000     -0.893640000
H       -2.399260000     -1.374180000      0.609540000
C       -2.624820000     -3.508210000     -2.019670000
H       -1.017570000     -3.976860000     -3.388500000
H       -4.016890000     -2.847040000     -0.497960000
C        2.065040000     -1.333300000     -0.369550000
C        2.685500000     -0.849560000     -1.535390000
C        2.731010000     -2.303750000      0.396050000
C        3.930830000     -1.334340000     -1.938680000
H        2.194800000     -0.083230000     -2.131320000
C        3.982920000     -2.784540000      0.004850000
H        2.293570000     -2.691270000      1.310270000
C        4.578850000     -2.304090000     -1.166180000
H        4.389120000     -0.954610000     -2.848090000
H        4.483970000     -3.534710000      0.611390000
C       -2.964380000      1.786790000      0.036200000
C       -1.904740000      1.487150000     -0.952120000
H       -2.905560000      1.066900000      0.862340000
C       -1.338790000      1.191500000     -2.024960000
H       -1.121760000      1.060620000     -3.090880000
H       -2.766080000      2.770170000      0.480270000
C       -4.379040000      1.763990000     -0.580330000
H       -4.560850000      0.776340000     -1.021390000
H       -4.420640000      2.487260000     -1.404020000
C       -5.471770000      2.084480000      0.448920000
H       -5.417040000      1.361600000      1.274980000
H       -5.276870000      3.071510000      0.891130000
C       -6.886640000      2.066390000     -0.147700000
H       -7.081070000      1.079510000     -0.590960000
H       -6.941120000      2.788580000     -0.974520000
C       -7.986620000      2.385970000      0.875170000
H       -7.933040000      1.664420000      1.701590000
H       -7.793610000      3.372480000      1.317870000
C       -9.397420000      2.365560000      0.271890000
H       -9.634900000      1.380980000     -0.148440000
H       -9.494470000      3.101720000     -0.535030000
H      -10.157740000      2.597110000      1.026340000
Na      -0.230330000      3.438870000     -3.505920000
C        5.948160000     -2.792820000     -1.561900000
F        6.937840000     -2.065290000     -0.967720000
F        6.157480000     -4.084870000     -1.204310000
F        6.161100000     -2.709780000     -2.898300000
C       -0.395930000     -1.720130000      6.069280000
F       -0.744290000     -0.610400000      6.763350000
F       -1.346610000     -2.658740000      6.315160000
F        0.754990000     -2.186580000      6.633140000
C       -3.636950000     -4.379370000     -2.714550000
F       -4.416510000     -3.666510000     -3.578950000
F       -3.061060000     -5.366770000     -3.443880000
F       -4.489210000     -4.976030000     -1.840950000
85                      
INT2Bc, NaRhC38PNH32OF10                                          
C       -3.779860000      1.052160000      0.229750000
C       -3.330420000      3.184080000     -0.579470000
C       -4.699650000      3.576110000     -0.442350000
C       -5.610160000      2.609180000      0.063970000
C       -5.149780000      1.354550000      0.399190000
H       -3.416180000      0.066140000      0.496690000
C       -2.350740000      4.114260000     -1.078640000
C       -5.094450000      4.890770000     -0.807190000
H       -6.660180000      2.870790000      0.182530000
H       -5.814320000      0.589200000      0.791250000
C       -4.142950000      5.774500000     -1.289420000
C       -2.789360000      5.399650000     -1.425640000
H       -6.135950000      5.185070000     -0.702070000
H       -4.438120000      6.783690000     -1.571180000
H       -2.059940000      6.112560000     -1.805390000
N       -2.887500000      1.919480000     -0.243260000
O       -1.090990000      3.732000000     -1.191230000
Rh      -0.750340000      1.687520000     -0.598020000
F        2.001520000      4.137400000      0.460410000
P       -0.478660000     -0.494920000     -0.006450000
C       -1.282170000     -1.730050000     -1.148400000
C       -2.221690000     -1.267320000     -2.082850000
C       -0.969240000     -3.101760000     -1.132120000
C       -2.849680000     -2.148080000     -2.967920000
H       -2.451570000     -0.206480000     -2.131240000
C       -1.588330000     -3.987920000     -2.014290000
H       -0.229820000     -3.491670000     -0.437310000
C       -2.534580000     -3.509630000     -2.929490000
H       -3.576320000     -1.769830000     -3.682200000
H       -1.335650000     -5.044900000     -1.983480000
C        1.222610000     -1.229420000      0.120440000
C        1.821480000     -1.564140000      1.342240000
C        1.958270000     -1.411920000     -1.064830000
C        3.122720000     -2.077520000      1.385370000
H        1.284930000     -1.435860000      2.277370000
C        3.249000000     -1.933700000     -1.031790000
H        1.523850000     -1.145580000     -2.024670000
C        3.835510000     -2.262950000      0.198660000
H        3.570330000     -2.329140000      2.343180000
H        3.799660000     -2.071030000     -1.959160000
C       -1.197170000     -0.901530000      1.664810000
C       -1.063080000      0.077670000      2.665900000
C       -1.858180000     -2.098890000      1.982140000
C       -1.557340000     -0.137240000      3.953170000
H       -0.574880000      1.020940000      2.431120000
C       -2.368340000     -2.316840000      3.265060000
H       -1.995110000     -2.874050000      1.235170000
C       -2.211000000     -1.338550000      4.252110000
H       -1.434230000      0.628910000      4.714460000
H       -2.879220000     -3.249650000      3.489640000
C        3.835780000      1.998100000     -1.672070000
C        2.402190000      1.988280000     -1.305400000
H        4.024600000      1.154080000     -2.349580000
C        1.202990000      1.835700000     -1.026800000
H        1.989030000      3.229340000      0.072220000
H        4.074070000      2.904610000     -2.244640000
C        4.793120000      1.898100000     -0.464620000
H        4.554230000      0.990410000      0.102540000
H        4.611120000      2.745150000      0.208880000
C        6.270140000      1.878300000     -0.880800000
H        6.445140000      1.030400000     -1.557860000
H        6.497460000      2.784920000     -1.459420000
C        7.235380000      1.782440000      0.309570000
H        7.008410000      0.876040000      0.888490000
H        7.060600000      2.629540000      0.988010000
C        8.715170000      1.761640000     -0.100400000
H        8.891210000      0.914700000     -0.777300000
H        8.943270000      2.667300000     -0.678620000
C        9.673090000      1.665940000      1.094640000
H        9.494450000      0.752160000      1.673970000
H       10.719230000      1.653410000      0.768390000
H        9.546600000      2.517770000      1.773570000
Na       0.896520000      4.621300000     -1.566850000
C       -2.797430000     -1.552640000      5.622520000
F       -2.850380000     -2.864650000      5.964340000
F       -2.091820000     -0.917520000      6.592050000
F       -4.076040000     -1.082180000      5.709030000
C       -3.164720000     -4.460030000     -3.913080000
F       -3.356340000     -5.696460000     -3.385730000
F       -4.370860000     -4.025890000     -4.355600000
F       -2.388140000     -4.634590000     -5.022150000
C        5.214670000     -2.862230000      0.226420000
F        5.194020000     -4.208770000     -0.004230000
F        6.028660000     -2.330940000     -0.723630000
F        5.835650000     -2.690300000      1.420170000
85                      
TS2Bc, NaRhC38PNH32OF10                                         
C       -1.953770000     -2.778300000      0.984720000
C       -0.598670000     -4.154050000     -0.313350000
C       -1.219570000     -5.333270000      0.205170000
C       -2.253560000     -5.162930000      1.165440000
C       -2.613810000     -3.890910000      1.552780000
H       -2.247200000     -1.778390000      1.282350000
C        0.462810000     -4.250300000     -1.277440000
C       -0.785520000     -6.608340000     -0.245570000
H       -2.747530000     -6.037570000      1.584730000
H       -3.398090000     -3.718310000      2.284970000
C        0.235490000     -6.687550000     -1.178290000
C        0.857870000     -5.529100000     -1.690980000
H       -1.257850000     -7.504060000      0.150550000
H        0.574290000     -7.662000000     -1.525340000
H        1.663790000     -5.614640000     -2.417260000
N       -0.980320000     -2.883250000      0.081580000
O        1.024310000     -3.141330000     -1.738870000
Rh       0.248800000     -1.378640000     -0.803300000
F        0.808940000     -0.439440000     -3.955460000
P       -0.736820000      0.496620000      0.060120000
C       -0.418430000      0.863970000      1.853640000
C        0.115600000     -0.160860000      2.650080000
C       -0.672510000      2.115580000      2.444310000
C        0.373200000      0.045470000      4.008320000
H        0.346290000     -1.123780000      2.201570000
C       -0.414070000      2.331350000      3.798030000
H       -1.064020000      2.938290000      1.851310000
C        0.103430000      1.291580000      4.581270000
H        0.783440000     -0.761520000      4.609630000
H       -0.620340000      3.303770000      4.238410000
C       -0.318470000      2.120800000     -0.736530000
C       -1.129050000      2.689720000     -1.729790000
C        0.887830000      2.761780000     -0.401760000
C       -0.755190000      3.876580000     -2.367120000
H       -2.064620000      2.220930000     -2.019020000
C        1.263110000      3.949810000     -1.026380000
H        1.543760000      2.338640000      0.353450000
C        0.441230000      4.506980000     -2.014770000
H       -1.397710000      4.301040000     -3.133920000
H        2.197850000      4.431590000     -0.750370000
C       -2.595070000      0.473080000     -0.076040000
C       -3.142890000     -0.170460000     -1.200290000
C       -3.468420000      1.052850000      0.858020000
C       -4.523560000     -0.219060000     -1.398900000
H       -2.482030000     -0.646330000     -1.921310000
C       -4.852400000      0.997730000      0.673070000
H       -3.087590000      1.545300000      1.746630000
C       -5.378870000      0.367960000     -0.459610000
H       -4.925720000     -0.713130000     -2.279680000
H       -5.511910000      1.450940000      1.408700000
C        4.336600000      0.604250000     -0.950520000
C        3.002610000      0.127530000     -1.326660000
H        4.698310000      1.264500000     -1.751830000
C        1.866240000     -0.256300000     -1.630470000
H        1.251550000     -0.309770000     -2.726840000
H        4.250450000      1.241400000     -0.059190000
C        5.369050000     -0.515630000     -0.697780000
H        4.994420000     -1.172350000      0.096930000
H        5.451840000     -1.132810000     -1.600710000
C        6.748760000      0.033950000     -0.311750000
H        7.111710000      0.697490000     -1.109340000
H        6.652690000      0.659170000      0.587120000
C        7.788300000     -1.066490000     -0.055000000
H        7.424640000     -1.730460000      0.741940000
H        7.884050000     -1.692130000     -0.953680000
C        9.171750000     -0.523770000      0.332070000
H        9.076990000      0.100870000      1.230570000
H        9.536030000      0.139470000     -0.464090000
C       10.205290000     -1.629030000      0.586850000
H       11.179830000     -1.209110000      0.860400000
H        9.886930000     -2.289480000      1.402280000
H       10.349400000     -2.250550000     -0.305020000
Na       0.992940000     -2.578710000     -3.952590000
C       -6.871150000      0.270070000     -0.639080000
F       -7.379610000     -0.859790000     -0.066380000
F       -7.529910000      1.313230000     -0.074900000
F       -7.233110000      0.230910000     -1.946050000
C        0.828420000      5.812330000     -2.654830000
F        0.258860000      5.985260000     -3.873580000
F        0.449330000      6.885310000     -1.898810000
F        2.171420000      5.926840000     -2.824430000
C        0.422520000      1.544260000      6.031660000
F        0.437690000      0.405190000      6.766580000
F        1.648870000      2.121800000      6.189480000
F       -0.470550000      2.383330000      6.616430000
85                     
INT1Bd, KRhC38PNH32OF10                                          
C        2.926260000      1.562270000      1.424190000  
C        2.083360000      3.629890000      0.763580000  
C        3.161450000      4.324910000      1.397390000  
C        4.140850000      3.540730000      2.063750000  
C        4.024120000      2.167150000      2.075300000  
H        2.832980000      0.481830000      1.426700000  
C        1.051520000      4.349880000      0.061520000  
C        3.211920000      5.742830000      1.338310000  
H        4.976120000      4.033350000      2.558670000  
H        4.755600000      1.536580000      2.573380000  
C        2.212540000      6.426340000      0.664080000  
C        1.146740000      5.749680000      0.033610000  
H        4.030430000      6.270620000      1.821620000  
H        2.243170000      7.513410000      0.615790000  
H        0.373820000      6.310370000     -0.488140000  
N        1.981900000      2.253250000      0.790940000  
O        0.075130000      3.687550000     -0.529730000  
Rh       0.180920000      1.586350000     -0.219280000  
F       -0.563770000      1.655800000     -4.396520000  
P        0.412180000     -0.687600000      0.032120000  
C        0.237310000     -1.362690000      1.751530000  
C        0.209340000     -0.458230000      2.823780000  
C        0.101330000     -2.737300000      2.021640000  
C        0.072070000     -0.909830000      4.139800000  
H        0.277620000      0.609190000      2.631080000  
C       -0.038900000     -3.195460000      3.331270000  
H        0.087900000     -3.461880000      1.211270000  
C       -0.052020000     -2.278720000      4.390910000  
H        0.047920000     -0.194000000      4.957000000  
H       -0.147070000     -4.260490000      3.521470000  
C       -0.749290000     -1.782360000     -0.913770000  
C       -0.402880000     -2.345170000     -2.149610000  
C       -2.049390000     -1.988590000     -0.417950000  
C       -1.326100000     -3.107140000     -2.872930000  
H        0.590460000     -2.207540000     -2.565250000  
C       -2.973120000     -2.750150000     -1.130650000  
H       -2.349420000     -1.567600000      0.538220000  
C       -2.609200000     -3.313520000     -2.361150000  
H       -1.035130000     -3.542430000     -3.824990000  
H       -3.969580000     -2.907340000     -0.724550000  
C        2.082420000     -1.270460000     -0.539380000  
C        2.626010000     -0.628780000     -1.667910000  
C        2.827650000     -2.283700000      0.082910000  
C        3.870470000     -1.003060000     -2.175110000  
H        2.073850000      0.173960000     -2.151550000  
C        4.081630000     -2.654480000     -0.411450000  
H        2.452200000     -2.791000000      0.965440000  
C        4.598560000     -2.019180000     -1.544290000  
H        4.267490000     -0.502930000     -3.055030000  
H        4.644740000     -3.439810000      0.085730000  
C       -3.041760000      1.656840000      0.362860000  
C       -1.974200000      1.493540000     -0.648300000  
H       -3.000960000      0.822310000      1.074610000  
C       -1.389260000      1.351360000     -1.740510000  
H       -1.118090000      1.304850000     -2.815430000  
H       -2.840410000      2.562400000      0.948660000  
C       -4.449780000      1.741830000     -0.263300000  
H       -4.637550000      0.831970000     -0.846530000  
H       -4.473930000      2.578440000     -0.972530000  
C       -5.551480000      1.922030000      0.790190000  
H       -5.517230000      1.083580000      1.500010000  
H       -5.348880000      2.829110000      1.376760000  
C       -6.958900000      2.015140000      0.183050000  
H       -7.161780000      1.108330000     -0.404130000  
H       -6.992590000      2.852890000     -0.527790000  
C       -8.067350000      2.197040000      1.230240000  
H       -8.035540000      1.359530000      1.940210000  
H       -7.865290000      3.103090000      1.817380000  
C       -9.470320000      2.290820000      0.615700000  
H       -9.717240000      1.384160000      0.050470000  
H       -9.545530000      3.140660000     -0.073230000  
H      -10.236920000      2.420180000      1.388050000  
K        0.061360000      3.898250000     -3.391270000  
C        5.966280000     -2.384140000     -2.059730000  
F        6.931310000     -1.549840000     -1.575020000  
F        6.334910000     -3.640950000     -1.709950000  
F        6.042990000     -2.308420000     -3.412880000  
C       -0.164010000     -2.786080000      5.805340000  
F       -0.608650000     -1.837720000      6.665040000  
F       -1.009870000     -3.843540000      5.906440000  
F        1.039160000     -3.212390000      6.287070000  
C       -3.626670000     -4.105820000     -3.136960000  
F       -4.533460000     -3.300140000     -3.762620000  
F       -3.066320000     -4.875420000     -4.101590000  
F       -4.349460000     -4.935400000     -2.337720000
85                     
INT2Bd, KRhC38PNH32OF10                                          
C       -3.584970000      1.370620000      0.941270000
C       -3.053800000      3.407440000     -0.043580000
C       -4.367120000      3.921750000      0.198530000
C       -5.293490000      3.066760000      0.855630000
C       -4.901430000      1.798320000      1.225090000
H       -3.277880000      0.370230000      1.225310000
C       -2.055950000      4.214730000     -0.703620000
C       -4.695070000      5.238730000     -0.220840000
H       -6.302360000      3.422230000      1.058030000
H       -5.581220000      1.115530000      1.728020000
C       -3.733100000      6.002960000     -0.862460000
C       -2.435220000      5.507020000     -1.105690000
H       -5.694480000      5.626030000     -0.037640000
H       -3.978600000      7.011240000     -1.191910000
H       -1.700810000      6.125950000     -1.618060000
N       -2.679240000      2.132750000      0.331090000
O       -0.845030000      3.734790000     -0.897920000
Rh      -0.640380000      1.674280000     -0.295500000
F        2.785280000      3.180740000      0.601470000
P       -0.486620000     -0.478650000      0.412780000
C       -1.910470000     -1.538590000     -0.162300000
C       -2.391220000     -1.296970000     -1.462250000
C       -2.531070000     -2.536410000      0.605970000
C       -3.447380000     -2.041180000     -1.989400000
H       -1.938740000     -0.510970000     -2.062610000
C       -3.599310000     -3.276980000      0.091540000
H       -2.200430000     -2.745620000      1.618140000
C       -4.052130000     -3.034000000     -1.209140000
H       -3.796130000     -1.844310000     -3.000030000
H       -4.067640000     -4.042990000      0.704290000
C        0.975390000     -1.527290000     -0.050820000
C        2.224610000     -1.210500000      0.513910000
C        0.898890000     -2.591700000     -0.958280000
C        3.358990000     -1.954070000      0.201400000
H        2.315620000     -0.378820000      1.207560000
C        2.038110000     -3.334510000     -1.291130000
H       -0.047930000     -2.866600000     -1.412930000
C        3.265590000     -3.021090000     -0.704670000
H        4.312180000     -1.703390000      0.661100000
H        1.956500000     -4.159380000     -1.993530000
C       -0.478560000     -0.726050000      2.262620000
C       -0.851710000      0.348630000      3.084320000
C       -0.090760000     -1.934110000      2.871760000
C       -0.858260000      0.222580000      4.476640000
H       -1.123090000      1.298480000      2.631450000
C       -0.090880000     -2.068610000      4.260280000
H        0.225940000     -2.780370000      2.267630000
C       -0.481390000     -0.988930000      5.063180000
H       -1.153380000      1.066350000      5.094700000
H        0.208170000     -3.011740000      4.711310000
C        3.488540000      1.689500000     -2.559660000
C        2.253220000      1.655930000     -1.746790000
H        3.357830000      1.023990000     -3.424440000
C        1.179680000      1.594840000     -1.132540000
H        2.404140000      2.579720000     -0.086110000
H        3.630150000      2.696700000     -2.975900000
C        4.769180000      1.276870000     -1.803090000
H        4.634350000      0.265890000     -1.401180000
H        4.905050000      1.940250000     -0.939890000
C        6.019610000      1.320250000     -2.692060000
H        5.870470000      0.663700000     -3.561040000
H        6.144930000      2.335720000     -3.094380000
C        7.303570000      0.904660000     -1.959630000
H        7.179810000     -0.111530000     -1.558980000
H        7.453580000      1.559310000     -1.089280000
C        8.557410000      0.947930000     -2.845340000
H        8.408190000      0.294410000     -3.715520000
H        8.683600000      1.963520000     -3.244480000
C        9.835660000      0.528550000     -2.107050000
H        9.755350000     -0.496640000     -1.726160000
H       10.710260000      0.570640000     -2.766090000
H       10.032620000      1.184740000     -1.250760000
K        1.150100000      5.326330000      0.199760000
C       -5.230140000     -3.799220000     -1.750790000
F       -5.169650000     -3.957210000     -3.097400000
F       -5.336660000     -5.039130000     -1.209900000
F       -6.412190000     -3.166230000     -1.493000000
C       -0.435520000     -1.127510000      6.561770000
F       -1.226880000     -0.225800000      7.193290000
F       -0.828040000     -2.360020000      6.977080000
F        0.825130000     -0.944870000      7.052710000
C        4.507910000     -3.791060000     -1.058030000
F        5.347130000     -3.071500000     -1.860350000
F        5.237770000     -4.123440000      0.041900000
F        4.242720000     -4.945080000     -1.717640000
85                      
TS2Bd, KRhC38PNH32OF10                                           
C       -1.366890000     -2.850390000      1.339440000
C        0.221950000     -4.066850000      0.152830000
C       -0.149010000     -5.282520000      0.808370000
C       -1.190920000     -5.215520000      1.773350000
C       -1.793300000     -4.004220000      2.034670000
H       -1.847890000     -1.900620000      1.541820000
C        1.269230000     -4.051430000     -0.834670000
C        0.526160000     -6.488050000      0.479500000
H       -1.500690000     -6.119550000      2.294560000
H       -2.593110000     -3.911180000      2.764630000
C        1.535140000     -6.462370000     -0.470870000
C        1.908480000     -5.268210000     -1.122180000
H        0.245150000     -7.411970000      0.979210000
H        2.058470000     -7.382760000     -0.724380000
H        2.706990000     -5.272470000     -1.861530000
N       -0.395120000     -2.858930000      0.427640000
O        1.583810000     -2.917430000     -1.430760000
Rh       0.477690000     -1.259550000     -0.685510000
F        0.389420000     -0.381940000     -4.053960000
P       -0.805940000      0.475430000      0.074740000
C       -0.516560000      1.016720000      1.831470000
C        0.206270000      0.161710000      2.677280000
C       -0.970580000      2.246500000      2.343950000
C        0.456230000      0.509490000      4.008250000
H        0.591770000     -0.776970000      2.288170000
C       -0.722410000      2.603220000      3.669180000
H       -1.512980000      2.943360000      1.710010000
C       -0.012750000      1.729100000      4.503480000
H        1.015620000     -0.167580000      4.648110000
H       -1.084520000      3.555860000      4.048520000
C       -0.703020000      2.101010000     -0.818190000
C       -1.670910000      2.512140000     -1.745690000
C        0.423730000      2.917900000     -0.613180000
C       -1.527580000      3.713860000     -2.446630000
H       -2.551920000      1.906360000     -1.934040000
C        0.569710000      4.120840000     -1.300820000
H        1.195710000      2.620770000      0.090950000
C       -0.407170000      4.518310000     -2.223800000
H       -2.289290000      4.014210000     -3.161160000
H        1.446480000      4.739380000     -1.125180000
C       -2.634840000      0.121960000      0.009480000
C       -3.088030000     -0.672650000     -1.058810000
C       -3.573260000      0.590460000      0.942950000
C       -4.442270000     -0.977860000     -1.204110000
H       -2.371510000     -1.063350000     -1.777830000
C       -4.929220000      0.278890000      0.812190000
H       -3.263500000      1.194710000      1.789310000
C       -5.363950000     -0.499390000     -0.265910000
H       -4.772530000     -1.585430000     -2.042770000
H       -5.639680000      0.649520000      1.546720000
C        4.047900000      1.124320000     -1.140460000
C        2.783300000      0.520040000     -1.572350000
H        4.418070000      1.749320000     -1.965770000
C        1.704870000      0.027300000     -1.927340000
H        0.978470000     -0.167300000     -2.958680000
H        3.855590000      1.815000000     -0.307780000
K        1.279110000     -2.838070000     -4.234410000
C        5.137470000      0.107690000     -0.736510000
H        4.754400000     -0.518680000      0.078410000
H        5.328730000     -0.563240000     -1.582930000
C        6.443100000      0.786590000     -0.301790000
H        6.814450000      1.418520000     -1.120940000
H        6.238350000      1.464010000      0.539210000
C        7.537210000     -0.210630000      0.105660000
H        7.165440000     -0.842750000      0.924450000
H        7.741430000     -0.888840000     -0.734940000
C        8.847320000      0.461590000      0.541630000
H        8.644290000      1.138690000      1.382320000
H        9.219610000      1.093170000     -0.276290000
C        9.935890000     -0.541220000      0.946780000
H       10.856060000     -0.030270000      1.251920000
H        9.607620000     -1.165130000      1.786690000
H       10.187260000     -1.211040000      0.115730000
C       -6.818580000     -0.871180000     -0.383680000
F       -7.104890000     -2.026300000      0.285070000
F       -7.639070000      0.079610000      0.130280000
F       -7.199230000     -1.071390000     -1.670380000
C        0.283380000      2.143290000      5.920960000
F        0.620640000      1.095570000      6.711380000
F        1.320280000      3.027990000      5.986880000
F       -0.776640000      2.758730000      6.507650000
C       -0.266050000      5.838280000     -2.931340000
F        1.024940000      6.119190000     -3.249050000
F       -0.978240000      5.892130000     -4.084310000
F       -0.701420000      6.880600000     -2.162610000
16
P(OMe)3, C3PH9O3                                          
P        0.901490000      2.742720000     -0.193120000
O        1.923000000      3.575060000      0.818080000
C        2.488950000      2.837940000      1.921310000
H        1.739430000      2.664410000      2.701040000
H        2.898900000      1.876350000      1.591280000
H        3.295630000      3.451580000      2.326160000
O       -0.546890000      2.812670000      0.599720000
C       -1.076080000      4.045190000      1.148430000
H       -2.034530000      3.793710000      1.605610000
H       -0.399170000      4.450690000      1.905300000
H       -1.225210000      4.785240000      0.357510000
O        0.811030000      4.018840000     -1.252380000
C        0.117410000      3.784470000     -2.495260000
H        0.449640000      2.853520000     -2.969160000
H       -0.965740000      3.744580000     -2.336970000
H        0.355930000      4.624800000     -3.149590000
97
INT3-s1, CsRhC42PNH38O3F10
C        2.871850000      2.782900000     -0.960050000
C        0.910180000      4.025890000     -1.125990000
C        1.627700000      5.187120000     -1.555560000
C        3.038310000      5.074800000     -1.674510000
C        3.657630000      3.879320000     -1.375940000
H        3.351690000      1.838470000     -0.728710000
C       -0.521970000      4.056080000     -0.970390000
C        0.920350000      6.385210000     -1.838060000
H        3.618590000      5.936820000     -1.999340000
H        4.734710000      3.759430000     -1.453940000
C       -0.456290000      6.405400000     -1.685470000
C       -1.171790000      5.266550000     -1.258320000
H        1.466440000      7.266510000     -2.165360000
H       -1.007990000      7.319830000     -1.896030000
H       -2.252140000      5.318690000     -1.141400000
N        1.547680000      2.838260000     -0.837430000
O       -1.169240000      2.977620000     -0.567780000
Rh       0.098270000      1.313600000     -0.179750000
F       -0.758960000      0.406790000     -3.016730000
Cs      -4.357840000      2.547320000     -0.840620000
P        1.531010000     -0.460180000      0.283320000
C        2.474580000     -0.227410000      1.862490000
C        2.559840000      1.060650000      2.414660000
C        3.103490000     -1.293500000      2.530020000
C        3.267590000      1.286310000      3.597750000
H        2.062820000      1.896290000      1.929310000
C        3.808830000     -1.076180000      3.714250000
H        3.044910000     -2.304880000      2.136150000
C        3.894280000      0.216610000      4.244400000
H        3.325210000      2.290960000      4.008600000
H        4.292410000     -1.911220000      4.214470000
C        0.828050000     -2.158380000      0.507710000
C        0.978340000     -3.167210000     -0.453500000
C        0.074500000     -2.429010000      1.664610000
C        0.392550000     -4.423750000     -0.267160000
H        1.558530000     -2.996530000     -1.354830000
C       -0.504470000     -3.681130000      1.859660000
H       -0.056480000     -1.667420000      2.427830000
C       -0.345080000     -4.680760000      0.890500000
H        0.525800000     -5.195510000     -1.020440000
H       -1.073990000     -3.875640000      2.765050000
C        2.841280000     -0.726610000     -1.004840000
C        2.465280000     -0.614130000     -2.355930000
C        4.177070000     -1.032820000     -0.698280000
C        3.397010000     -0.817300000     -3.375380000
H        1.442810000     -0.364160000     -2.624780000
C        5.115940000     -1.226460000     -1.714670000
H        4.508230000     -1.115000000      0.331840000
C        4.723450000     -1.124490000     -3.053050000
H        3.085390000     -0.734810000     -4.413440000
H        6.145540000     -1.461370000     -1.457270000
C       -3.360190000     -1.307310000      0.347170000
C       -2.446560000     -0.247710000      0.928170000
H       -4.390770000     -0.938590000      0.434060000
C       -1.384260000      0.287990000      0.409450000
H       -0.589560000      0.633090000     -2.084540000
H       -3.311690000     -2.181460000      1.012490000
C       -7.616220000      1.241410000      3.063970000
H       -8.004260000      0.529130000      2.327370000
H       -7.676950000      0.778830000      4.055680000
C       -5.316020000      0.617310000      2.723610000
C       -4.027620000      1.108610000      2.487260000
C       -2.827450000      0.245070000      2.412960000
H       -2.972210000     -0.692080000      2.964660000
O       -6.284080000      1.652450000      2.752720000
O       -5.698750000     -0.568560000      2.913180000
H       -3.897680000      2.185280000      2.406160000
H       -1.945560000      0.739180000      2.826110000
C       -3.064980000     -1.746530000     -1.092750000
H       -2.039350000     -2.130500000     -1.153700000
H       -3.104010000     -0.877620000     -1.762380000
C       -4.043690000     -2.820330000     -1.590130000
H       -3.998150000     -3.690820000     -0.920560000
H       -5.071510000     -2.435860000     -1.521860000
C       -3.770530000     -3.276840000     -3.030560000
H       -2.742320000     -3.659370000     -3.100910000
H       -3.818670000     -2.407860000     -3.702350000
C       -4.744540000     -4.354280000     -3.529010000
H       -4.696260000     -5.223300000     -2.858910000
H       -5.772370000     -3.972750000     -3.460270000
C       -4.464380000     -4.805540000     -4.968720000
H       -4.539770000     -3.965430000     -5.669560000
H       -3.455730000     -5.225360000     -5.063530000
H       -5.175770000     -5.573590000     -5.292840000
C       -1.014670000     -6.015120000      1.084100000
F       -0.423930000     -7.003440000      0.367950000
F       -1.011920000     -6.409750000      2.383620000
F       -2.323700000     -5.988910000      0.697250000
C        5.744790000     -1.290410000     -4.148670000
F        6.348530000     -0.107830000     -4.462080000
F        6.737890000     -2.146980000     -3.802670000
F        5.197670000     -1.757640000     -5.298070000
C        4.614710000      0.447320000      5.548050000
F        5.158440000      1.687560000      5.624250000
F        3.777050000      0.327790000      6.617910000
F        5.619670000     -0.441340000      5.747070000
H       -8.221510000      2.151740000      3.047930000
70
INT3-s4, CsRhC33PNH31OF
C       -0.354070000      3.274470000      0.414820000
C       -2.384810000      2.204340000      0.772450000
C       -3.056220000      3.448670000      1.006970000
C       -2.273750000      4.633990000      0.930820000
C       -0.929200000      4.547600000      0.640890000
H        0.700580000      3.192840000      0.171160000
C       -3.105570000      0.947470000      0.853610000
C       -4.445410000      3.459290000      1.303120000
H       -2.746890000      5.599190000      1.104880000
H       -0.302440000      5.433580000      0.578030000
C       -5.129190000      2.254250000      1.366240000
C       -4.481560000      1.021180000      1.149230000
H       -4.950760000      4.406440000      1.477020000
H       -6.194330000      2.252680000      1.593510000
H       -5.041490000      0.090260000      1.215960000
N       -1.045470000      2.142360000      0.472200000
O       -2.488260000     -0.191850000      0.664390000
Rh      -0.375240000     -0.022000000      0.164360000
F       -0.827640000      0.035240000     -2.073430000
Cs      -3.191640000     -1.638190000     -2.057360000
P        1.935540000      0.189090000     -0.125730000
C        2.875430000      0.490840000      1.442460000
C        2.181170000      1.030110000      2.538960000
C        4.251690000      0.232440000      1.578860000
C        2.843520000      1.312900000      3.738900000
H        1.113570000      1.222290000      2.457020000
C        4.914270000      0.508320000      2.779470000
H        4.812800000     -0.192170000      0.750340000
C        4.212680000      1.051400000      3.862950000
H        2.288040000      1.729320000      4.576720000
H        5.978480000      0.299140000      2.867350000
C        2.883630000     -1.198600000     -0.906370000
C        3.332020000     -1.139440000     -2.235780000
C        3.110800000     -2.378030000     -0.172040000
C        3.998790000     -2.226690000     -2.816010000
H        3.170790000     -0.243680000     -2.828130000
C        3.785730000     -3.458050000     -0.746690000
H        2.761860000     -2.455920000      0.853200000
C        4.231470000     -3.388270000     -2.073160000
H        4.340520000     -2.158520000     -3.846920000
H        3.958720000     -4.357270000     -0.158820000
C        2.383260000      1.632450000     -1.199660000
C        1.537500000      1.906300000     -2.292280000
C        3.511960000      2.441700000     -0.984320000
C        1.836310000      2.963880000     -3.159820000
H        0.642550000      1.294600000     -2.435380000
C        3.798080000      3.504830000     -1.849170000
H        4.170360000      2.258190000     -0.140130000
C        2.963560000      3.765810000     -2.942530000
H        1.179690000      3.168190000     -4.003820000
H        4.671700000      4.127460000     -1.666580000
H        3.187230000      4.591950000     -3.614700000
H        4.754900000     -4.230540000     -2.520980000
H        4.728490000      1.264130000      4.797030000
C       -0.131950000     -4.429820000      0.876170000
C       -0.220460000     -2.930710000      1.104320000
H       -1.014560000     -4.955470000      1.265990000
C       -0.163980000     -2.041060000      0.092750000
H       -0.041230000     -2.444260000     -0.921820000
H        0.739380000     -4.860020000      1.392950000
H       -0.039450000     -4.668320000     -0.188290000
C       -1.541940000     -2.998930000      3.286340000
C       -0.317840000     -2.504360000      2.568770000
H        0.577020000     -2.852110000      3.109480000
H       -2.510920000     -2.755730000      2.851710000
H       -0.289180000     -1.402910000      2.593550000
C       -1.482720000     -3.966390000      4.427520000
H       -0.685240000     -3.706860000      5.137810000
H       -2.428210000     -4.007200000      4.979720000
H       -1.264950000     -4.995680000      4.090150000
